# Supplementary material
Source: PubMed Central journal article supplement (PMC6882119)
Supplement: ao9b02845_si_001.pdf [file ao9b02845_si_001.pdf]

**The expression profile of the digestive enzymes of *Manis javanica* reveals its adaptation to diet specialization**

Fuhua Zhang, Na Xu, Yishuang Yu, Shibao Wu<sup>\*¶</sup>, Shaoshan Li<sup>\*¶</sup>, Wenhua Wang

*Key Laboratory of Ecology and Environmental Science in Guangdong Higher Education, Guangzhou Key Laboratory of Subtropical Biodiversity and Biomonitoring, School of Life Science, South China Normal University, Guangzhou, Guangdong Province, PR China*

**\*Corresponding authors:** Tel: +86-20-85211372; Fax: +86-20-85215535

**Address:** No.55, Zhongshan Avenue West, Tianhe District, College of Life Sciences, South China Normal University, Guangzhou 510631, PR China

**E-mail:** [wushibao@163.com](mailto:wushibao@163.com) (Prof. Shibao Wu) and [lishsh@scnu.edu.cn](mailto:lishsh@scnu.edu.cn) (Prof. Shaoshan Li)

¶: These authors contributed equally to this work.

Email addresses for all authors:

Fuhua Zhang, [zhangfuhuahbu@163.com](mailto:zhangfuhuahbu@163.com)

Na Xu, [1024036372@qq.com](mailto:1024036372@qq.com)

Yishuang Yu, [2713329287@qq.com](mailto:2713329287@qq.com)

Wenhua Wang, [1747734342@qq.com](mailto:1747734342@qq.com)

Table S1. The pathways and proteins enriched in saliva of Sunda pangolin HS-04

| No. | Map_ID  | Map_Name                                    | Seqs                                                                                                                                                                                                                                                                          | Seqs_Num |
|-----|---------|---------------------------------------------|-------------------------------------------------------------------------------------------------------------------------------------------------------------------------------------------------------------------------------------------------------------------------------|----------|
| 1   | ko04810 | Regulation of actin cytoskeleton            | A0A2F0AZI2 M3X6F7 G1NYU0 J9NSU4 W5Q9P7 E2RRM2 M3YID7 W5PL19 F1PAG6 L5JWP8 A0A1S3W7C2 L7MS34 U6D230 A0A212CTH4 T0M3Y2 A0A287ALZ4 F7DZ82 K9IRV7 G9KC43 A0A1S3WD21 A0A212CN16 W5PA65 L8II38 A0A2F0BAE6 A0A2I2UPY7 T0MIA6 M3XCV3 P46196 G1LS78 F6YRC5 K9IU88 L5KJW2 L5L5G8 Q38QA2 | 34       |
| 2   | ko04530 | Tight junction                              | F1RYV9 P61157 M3X6F7 Q9XSU1 A0A1S2ZHF9 S7QBL1 W5PL19 L5JXW9 L5LD96 A0A1S3W7C2 A0A2F0BQ66 D2HFK4 P60662 F7DZ82 D7PVJ0 L8II38 D2HXP5 A0A2F0BNX7 A0A2I2UDR0 G1LS78 Q9TV61 G1L395 G1PUH7 K9IU88 K9IVZ8 L5JX50 L5M0R5 Q38QA2 Q8MJV1 S9XGF7 S9Y847 W5PT09                           | 32       |
| 3   | ko04510 | Focal adhesion                              | A0A2F0AZI2 M3X6F7 G1NYU0 A0A286ZU89 M3YID7 W5PL19 A0A1S3W7C2 G9KTH8 U6D230 A0A212CTH4 F7DZ82 G9KC43 F1PCD8 U6DDQ3 D2H8U8 F1MRZ5 B2KIJ4 C0HJN7 C0HJN8 D2H2H6 M3XCV3 P46196 F1SS26 K9IU88 M3WHG4 M3YD12 M3YZL1 Q38QA2 W5QFP0                                                    | 29       |
| 4   | ko05200 | Pathways in cancer                          | A0A077KFB1 S9YK27 A0A2F0AZI2 Q29219 A7E3V7 A0A0D3L3J1 M3YHH7 A0A286ZU89 A0A1S2ZD93 M3YID7 A0A212D1X2 A0A1S3W7C2 A0A212CTH4 A0A1S3WJ55 A0A212CFU6 A0A287A9T4 W5P5I7 F1PCD8 U6DL12 A0A212DH08 K9KAF1 A4IFG0 P46196 E2REA7 M3YKX1 F6WBP0 F6S2I3 S9X7J7                           | 28       |
| 5   | ko04141 | Protein processing in endoplasmic reticulum | A0A077KFB1 S9YK27 A0A212D1X2 A0A212DA06 U6DFE9 U6DIJ0 A0A2F0BNQ9 U6CZT6 L5JPT1 A0A2F0AZ63 A0A1S3AA38 A0A287A9T4 F7B821 A0A212CWI9 A0A287A6R6 M1ET04 Q3ZBT1 A0A287AP11 L8HNW7 A0A2I2V4B0 W5PMM7 B3RF11 W5PQ75 E2RQ08 L8IIA8 L5K0I9 L5KG13 M3VUU7                               | 28       |
| 6   | ko04151 | PI3K-Akt signaling pathway                  | A0A077KFB1 S9YK27 A0A212CM85 D2GY30 F1PKW7 A7E3V7 P68253 A0A287ARU7 A4IE76 A0A212CTH4 P68509 D2HFK4 A0A287A9T4 F1PCD8 M3WHR6 D2HXP5 U6DDQ3 D2H8U8 F1MRZ5 C0HJN7 C0HJN8 D2H2H6 P46196 F1SS26 G1QDJ7 M3WHG4 W5QFP0                                                              | 27       |

|    |         |                                             |                                                                                                                                                                                                                  |    |
|----|---------|---------------------------------------------|------------------------------------------------------------------------------------------------------------------------------------------------------------------------------------------------------------------|----|
| 7  | ko00010 | Glycolysis / Gluconeogenesis                | A0A1S3ALC7 Q06YX7 E2I6M4 A0A1S2ZLY9 A0A2F0BIN9 M3Z028 A0A1S3AMF1 U6DJL2 Q9XSJ4 A0A286ZYX8 S7PLQ5 M3WCP0 B3IVM1 S7QAM2 D2H7H6 I3PVS0 Q9GKX6 E2R2C3 F1PFN3 F1PVW0 F1Q3S9 M3W3A3 G9KEQ1 M3WB78 M3YMB2 Q7YS14 S9WDQ9 | 27 |
| 8  | ko04144 | Endocytosis                                 | S9WFN9 F1PAG6 A0A1S3W7C2 T0NRI6 L7MS34 S7MXD2 L5JPT1 A0A287ALZ4 A0A1S3AA38 A0A2F0BP85 A0A1S3WR90 S7P4L1 K9IRV7 A0A1S3WPH6 L8HNNW7 A0A2F0BHR8 A0A2F0BMU5 F1PJ62 U6DDQ9 L5KJW2 U6DBP3                              | 21 |
| 9  | ko05165 | Human papillomavirus infection              | A0A286ZU89 A0A1S3W7C2 A0A2F0BQ66 A0A212CTH4 D2HFK4 A0A1S3AMF1 F1PCD8 M3WHR6 K9KAF1 D2HXP5 U6DDQ3 D2H8U8 F1MRZ5 B3IVM1 C0HJN7 C0HJN8 D2H2H6 P46196 F1SS26 M3WHG4 W5QFP0                                           | 21 |
| 10 | ko05169 | Epstein-Barr virus infection                | D2GY30 U6DEF6 S9Y4K3 F1PKW7 F7B5C4 P68253 G9KIZ4 A0A287ARU7 L7MS26 A4IE76 E2RM61 L5JPT1 P68509 Q3T054 A0A1S3AA38 K9K2H5 U6DKX6 L8HNNW7 D2HM81 G1QDJ7                                                             | 20 |
| 11 | ko05205 | Proteoglycans in cancer                     | A0A286ZU89 A0A1S3W7C2 U6D230 A0A212CTH4 A0A2F0B3S0 L8II38 U6DDQ3 G9K8Z7 B2KIJ4 D2H6N0 D2I7G0 P46196 G1LS78 F1SS26 F6YRC5 L5L5G8 M3YD12 M3YZL1 Q38QA2 W5QFP0                                                      | 20 |
| 12 | ko00710 | Carbon fixation in photosynthetic organisms | A0A1S3ALC7 Q06YX7 A0A0B4J194 A0A0D3L3M5 M1EP96 A0A1S2ZXM8 A0A286ZYX8 S7PLQ5 F1PFN3 K9K2D2 G9KEQ1 K9IZ11 L5KT65 M3WB78 M3YMB2 S7N064 S9WDQ9 S9X8R2 S9XYV1                                                         | 19 |
| 13 | ko05203 | Viral carcinogenesis                        | D2GY30 F1PKW7 M3X6F7 P68253 A0A287ARU7 A4IE76 A0A1S3W7C2 P68509 S7PCZ7 F7DZ82 A0A1S3AMF1 A0A212CN16 A0A287B646 B3IVM1 T0MIA6 P46196 F7E454 K9IU88 M3Z3Z5                                                         | 19 |
| 14 | ko04915 | Estrogen signaling pathway                  | A0A077KFB1 S9YK27 A0A212CTH4 L5JPT1 A0A212CFU6 A0A1S3AA38 A0A1S3AIT4 A0A287A9T4 W5P5I7 A0A212D793 U6DL12 L8HNNW7 D2HR28 P46196 W5Q494 L7N177 M3VXK4 M3VXQ9                                                       | 18 |
| 15 | ko00230 | Purine metabolism                           | U6D6E9 D2H8I5 M1ECI9 S9WB78 K9J1I9 U6DQ88 F1MCZ0 A0A1S3AMF1 G1LN34 L7MRX7 A0A212CXS3 A0A287AQU3 M1ED73 B3IVM1 D2H7H6 F7AJ54 L5JRN4                                                                               | 17 |
| 16 | ko04217 | Necroptosis                                 | D2H018 S9YK27 L8IK69 D2HUG1 Q864L8 A0A287A9T4 F1Q2N5 A0A2F0B0P2 K9KAF1                                                                                                                                           | 17 |

|    |         |                                        |                                                                                                                                         |    |
|----|---------|----------------------------------------|-----------------------------------------------------------------------------------------------------------------------------------------|----|
|    |         |                                        | F6RV94 M3WGI7 G1MGA9 E2R685 K9KE65 F6UAQ8 F6X6A6 S9YK31                                                                                 |    |
| 17 | ko04666 | Fc gamma R-mediated phagocytosis       | A0A2F0AZI2 W5Q9P7 F1PAG6 A0A1S3W7C2 L7MS34 A0A212CTH4 A0A287ALZ4 K9IRV7 A0A212CN16 W5PA65 A0A2F0BAE6 F1PJ62 T0MIA6 P46196 G1QDJ7 L5KJW2 | 16 |
| 18 | ko04926 | Relaxin signaling pathway              | P63258 A0A287AAR4 A7E3V7 Q3ZC07 A0A212CTH4 A0A212CFU6 W5PZK7 G1LRC6 U6DL12 D2H8U8 A7UDB4 C0HJN7 C0HJN8 P46196 O46546 P84336             | 16 |
| 19 | ko03050 | Proteasome                             | U6DEF6 S9Y4K3 G9KIZ4 J9P849 Q6QT48 L7MS26 A0A212CSP3 E2RM61 E2R4H4 K9J1S8 D2HBR7 K9K2H5 G9KIX5 Q5JC42 U6DKX6 F6TV65                     | 16 |
| 20 | ko03040 | Spliceosome                            | A0A2I2UMT1 M3Z0N6 U6DT89 G9KFB9 A0A1S2ZUH6 L5JPT1 A0A1S3AA38 L8HUB1 S9X714 M3Y9J3 D2HRD5 A0A2F0AUF1 A0A212D2L3 A0A287B646 L8HNW7        | 15 |
| 21 | ko00020 | Citrate cycle (TCA cycle)              | U6DJM0 A0A0D3L3G2 A0A0D3L3J1 A0A0D3L3I9 A0A2F0B9B8 A0A0D3L3M5 U6DJV4 A0A212C3P6 A0A2F0BIN9 P33198 K9K2D2 G9K557 K9J2S6 L5KT65 S9X8R2    | 15 |
| 22 | ko04270 | Vascular smooth muscle contraction     | P63258 A0A287AAR4 Q3ZC07 U6D230 A0A212CTH4 P60662 W5PZK7 G1LRC6 O18960 W5P5I7 U6DL12 A7UDB4 P46196 O46546 P84336                        | 15 |
| 23 | ko05418 | Fluid shear stress and atherosclerosis | A0A077KFB1 S9YK27 A0A286ZU89 U6CVR9 M3YID7 A0A1S3WJ55 A0A287A9T4 W5P5I7 A0A212DH08 A4IFG0 D2H6N0 E2REA7 F6WBP0 F6S2I3 Q38QA2            | 15 |
| 24 | ko05132 | Salmonella infection                   | F1PAG6 L5LD96 L5JWP8 A0A1S3W7C2 L7MS34 A0A287ALZ4 K9IRV7 I1WWX7 B2KIJ4 P46196 L5KJW2 M3YD12 M3YZL1 Q38QA2 W5NYP8                        | 15 |
| 25 | ko04610 | Complement and coagulation cascades    | E2RRM2 A0A1S3WJA6 P34955 U6DDQ3 A0A2I2U1U0 M3WN28 R9QSM8 L5LL13 D2I358 E2RS75 F1Q421 F6RMD0 F7E454 M3YGK4 S9YD43                        | 15 |
| 26 | ko04010 | MAPK signaling pathway                 | A0A2F0AZI2 G1NYU0 M3YID7 A0A1S3W7C2 A0A212CTH4 L5JPT1 A0A1S3AA38 A0A212BZC1 L5KRT7 L8HNW7 D2HM81 B2KIJ4 P46196 M3YD12 M3YZL1            | 15 |
| 27 | ko00030 | Pentose phosphate pathway              | A0A1S2ZXM8 U6D5B9 M3XAY5 A0A286ZYX8 D2H7H6 I3PVS0 F7BA40 E2R2C3 F1Q3S9 F1RIF8 K9IZ11 M3WB78 M3YMB2 S7N064 S9XYV1                        | 15 |
| 28 | ko05100 | Bacterial invasion of epithelial cells | A0A2F0AZI2 A0A286ZU89 A0A1S2ZD93 F1PAG6 A0A1S3W7C2 L7MS34 A0A287ALZ4 K9IRV7 A0A1S3WPH6 M1EEX3 M3XCV3 L5KJW2 Q38QA2 U6DBP3               | 14 |
| 29 | ko04146 | Peroxisome                             | A0A0D3L3I9 K9K2F9 A0A212CXS3 S9XUW6 A0A287AQU3 P33198 Q712P4 O97492 F1PEH9                                                              | 14 |

|    |         |                                       |                                                                                                                          |    |
|----|---------|---------------------------------------|--------------------------------------------------------------------------------------------------------------------------|----|
|    |         |                                       | G1PK52 G9K557 G9KBY0 L5KEH1 L5KNS3                                                                                       |    |
| 30 | ko04520 | Adherens junction                     | M3X6F7 A0A286ZU89 A0A1S2ZD93 M3YID7 L5LD96 A0A1S3W7C2 F7DZ82 A0A2F0B3S0<br>M3XCV3 P46196 F6YRC5 K9IU88 L5L5G8 Q38QA2     | 14 |
| 31 | ko05130 | Pathogenic Escherichia coli infection | F1RYV9 A0A286ZU89 S7QBL1 F1PAG6 A0A1S3W994 A0A1S3W7C2 L7MS34 A0A287ALZ4<br>K9IRV7 A0A2F0BNX7 D2H6T7 G1LS78 L5KJW2 Q38QA2 | 14 |
| 32 | ko04114 | Oocyte meiosis                        | D2GY30 F1PKW7 P68253 A0A212D1X2 A0A287ARU7 A4IE76 U6D230 A0A212CTH4 P68509<br>D2HFK4 A0A212BZC1 W5P5I7 D2HXP5 P46196     | 14 |
| 33 | ko05010 | Alzheimer's disease                   | Q06YX7 U6DJM0 D2H8J8 A0A1S2ZDG4 W5P5I7 Q0QEM6 U6DL12 M3YN60 G9K555 P46196<br>F1PFN3 F6V5A0 G9KEQ1 S9XPD9                 | 14 |
| 34 | ko04145 | Phagosome                             | F1RYV9 S7QBL1 A0A1S3W994 A0A2F0BNQ9 A0A1S3WR90 U6DSW9 A0A2F0BNX7 F1SS26<br>F7E454 G1QDJ7 M3VUU7 Q38QA2 W5NYP8 W5QFP0     | 14 |
| 35 | ko03010 | Ribosome                              | A3QP73 S7PBL4 L8IVX5 G1MPM4 A0A2F0AVS6 A0A2F0AUS8 W5P0I6 S7Q1D8 Q29231<br>W5Q688 K9K4H8 S7NZK0 A0A2F0BAM7 A0A287BNS9     | 14 |
| 36 | ko04015 | Rap1 signaling pathway                | A0A2F0AZI2 A0A286ZU89 M3YID7 L5JWP8 A0A1S3W7C2 G9KTH8 A0A212CTH4<br>A0A212CFU6 W5P5I7 U6DL12 P46196 F1SS26 Q38QA2 W5QFP0 | 14 |
| 37 | ko04371 | Apelin signaling pathway              | P63258 A0A287AAR4 A7E3V7 Q3ZC07 A0A212CTH4 A0A212CFU6 W5PZK7 G1LRC6<br>W5P5I7 U6DL12 A7UDB4 P46196 O46546 P84336         | 14 |
| 38 | ko00480 | Glutathione metabolism                | A0A0D3L3I9 A0A1S3WJ55 A0A212DH08 P33198 A4IFG0 U6D6B6 E2REA7 F1RIF8 F6WBP0<br>F6S2I3 G9K557 I3LD43 U6CRF3 S7MQ22         | 14 |
| 39 | ko04670 | Leukocyte transendothelial migration  | M3X6F7 A0A286ZU89 A0A1S2ZD93 W5PL19 A0A1S3W7C2 A0A212CFU6 F7DZ82 G9KC43<br>L8II38 M3XCV3 G1LS78 K9IU88 Q38QA2            | 13 |
| 40 | ko03013 | RNA transport                         | A0A212CM85 A0A2I2UMT1 U6D3D7 B3EX57 S7Q3I0 U6DIJ0 A6YLM4 T0M9A4 T0M3Y2<br>Q3T054 U6D7A2 E2RER1 L5K2F4                    | 13 |
| 41 | ko00680 | Methane metabolism                    | A0A1S2ZLY9 A0A212CZ82 M3Z028 Q9XSJ4 A0A286ZYX8 M3WCP0 S7QAM2 I3PVS0<br>F1Q3S9 G1M424 M3W3A3 M3WB78 M3YMB2                | 13 |
| 42 | ko05146 | Amoebiasis                            | U6DR03 M3X6F7 A0A1S3WR90 F7DZ82 F1PCD8 U6DL12 D2HM81 D2H8U8 C0HJN7                                                       | 13 |

|    |         |                                        |                                                                                                      |    |
|----|---------|----------------------------------------|------------------------------------------------------------------------------------------------------|----|
|    |         |                                        | C0HJN8 M3XCV3 G1QDJ7 K9IU88                                                                          |    |
| 43 | ko00270 | Cysteine and methionine metabolism     | A0A0B4J194 A0A0D3L3M5 E2I6M4 M1EP96 K9KBH7 U6DQ23 F1PVW0 K9K2D2 G1NT70 K9IIR5 L5KT65 Q7YS14 S9X8R2   | 13 |
| 44 | ko04922 | Glucagon signaling pathway             | E2I6M4 M3Z028 A0A1S3AMF1 W5P5I7 A0A2F0B0P2 U6DL12 B3IVM1 S7QAM2 F6RV94 M3WGGJ7 F1PVW0 Q7YS14         | 12 |
| 45 | ko04910 | Insulin signaling pathway              | A0A212CM85 A0A2F0AZI2 U6D230 F1RV23 A0A212CTH4 W5P5I7 M3WHR6 A0A2F0B0P2 F6RV94 M3WGGJ7 P46196 M3WB78 | 12 |
| 46 | ko05150 | Staphylococcus aureus infection        | A0A1S3WJA6 M3WN28 F6SK75 L5LL13 D2I358 E2RS75 F1Q421 F6RMD0 F7E454 G1QDJ7 M3YGK4 S9YD43              | 12 |
| 47 | ko04261 | Adrenergic signaling in cardiomyocytes | Q29219 F1P916 U6D230 A0A212CFU6 D2HFK4 W5P5I7 A0A2F0BGA7 U6DL12 D2HXP5 P46196 K9IX40 S9X7J7          | 12 |
| 48 | ko04918 | Thyroid hormone synthesis              | A0A077KFB1 P02769 A0A2F0BNQ9 A0A212CWI9 A0A2F0BGA7 U6DL12 P49064 B0JYQ0 B3VHM9 L5K0I9 S7MQ22 X2GM95  | 12 |
| 49 | ko05322 | Systemic lupus erythematosus           | L8IK69 M3X6F7 S7PCZ7 F7DZ82 D2HRD5 D2H4C5 F7E454 G1QDJ7 K9IU88 M3YGK4 M3Z3Z5 S9YD43                  | 12 |
| 50 | ko00620 | Pyruvate metabolism                    | A0A0D3L3J1 A0A0D3L3M5 E2I6M4 A0A2F0BIN9 A0A1S3AMF1 G1Q3U8 B3IVM1 F1PVW0 K9K2D2 L5KT65 Q7YS14 S9X8R2  | 12 |
| 51 | ko04611 | Platelet activation                    | W5PL19 G9KTH8 U6D230 A0A212CFU6 A0A1S3WJA6 U6DL12 M3WN28 D2H8U8 C0HJN7 C0HJN8 P46196 Q38QA2          | 12 |
| 52 | ko04390 | Hippo signaling pathway                | D2GY30 F1PKW7 A0A286ZU89 A0A1S2ZD93 P68253 A0A287ARU7 A4IE76 U6D230 P68509 D2HFK4 D2HXP5 Q38QA2      | 12 |
| 53 | ko05164 | Influenza A                            | A0A2I2UMT1 A0A212CTH4 U6DIJ0 L5JPT1 A0A1S3AA38 K9KAF1 P00761 L8HNW7 I1WWX7 P46196 F1Q421 Q38QA2      | 12 |
| 54 | ko03018 | RNA degradation                        | W5P2C3 A0A2F0AVG7 M3Z0N6 A0A1S2ZLY9 S9X714 A0A2F0BB88 Q9XSJ4 M3WCP0 I3PVS0 K9KGI2 F1Q3S9             | 11 |
| 55 | ko05012 | Parkinson's disease                    | U6DJM0 D2H8J8 A0A212DA06 F7DKB2 A0A212CFU6 K9K1Z6 Q0QEM6 F6WPB4 E2R685                               | 11 |

|    |         |                                             |                                                                                              |    |
|----|---------|---------------------------------------------|----------------------------------------------------------------------------------------------|----|
|    |         |                                             | E2RGH5 S9XPD9                                                                                |    |
| 56 | ko00500 | Starch and sucrose metabolism               | A0A212CX07 A0A2F0B0P2 M3X654 F1SK65 F6RV94 M3WGG7 D2H7H6 D2H9W9 G1P6X0 E2R2C3 S7PZQ3         | 11 |
| 57 | ko04612 | Antigen processing and presentation         | S9YK27 L5JXW9 A0A2F0BNQ9 L5JPT1 A0A1S3AA38 Q5JC42 A0A287A9T4 L8H9W7 W5PMM7 B3RF11 M3VUU7     | 11 |
| 58 | ko04512 | ECM-receptor interaction                    | F1PCD8 U6DDQ3 D2H8U8 F1MRZ5 C0HJN7 C0HJN8 D2H2H6 D2H6N0 F1SS26 M3WHG4 W5QFP0                 | 11 |
| 59 | ko00983 | Drug metabolism - other enzymes             | A0A1S3WJ55 G1LN34 Q3SZM8 A0A212CXS3 A0A212DH08 A0A287AQU3 A4IFG0 E2REA7 F6WBP0 F6S2I3 F7AJ54 | 11 |
| 60 | ko05131 | Shigellosis                                 | A0A2F0AZI2 F1PAG6 L5JWP8 A0A1S3W7C2 L7MS34 A0A287ALZ4 K9IRV7 M3XCV3 P46196 L5KJW2 Q38QA2     | 11 |
| 61 | ko00520 | Amino sugar and nucleotide sugar metabolism | A0A1S2ZRS1 W6FSS0 A0A212CX07 D2H0F5 F6W683 D2H7H6 D2HHV4 E2R2C3 K9KC76 G1LGG0 T0NRJ1         | 11 |
| 62 | ko00630 | Glyoxylate and dicarboxylate metabolism     | A0A0D3L3G2 A0A0D3L3M5 F6QTI9 A0A2F0BIN9 O97492 E2RMT0 K9KE65 K9K2D2 K9J2S6 L5KT65 S9X8R2     | 11 |
| 63 | ko05134 | Legionellosis                               | W5P2C3 B3EX57 A0A1S2ZFR3 L8I358 L5JPT1 A0A1S3AA38 Q3ZBT1 L8H9W7 I1WWX7 E2RER1 F7E454         | 11 |
| 64 | ko05206 | MicroRNAs in cancer                         | A0A2F0AZI2 F7B5C4 F1P916 A0A212CTH4 A0A287B646 F1MRZ5 D2H2H6 G1LS78 F1SS26 F6YDZ0 W5QFP0     | 11 |
| 65 | ko04066 | HIF-1 signaling pathway                     | A0A212CM85 Q06YX7 A0A1S2ZLY9 A0A212CTH4 Q9XSJ4 M3WCP0 P46196 F1PFN3 P27425 G9KEQ1 L5KZX6     | 11 |
| 66 | ko05225 | Hepatocellular carcinoma                    | A0A286ZU89 A0A212CTH4 A0A1S3WJ55 A0A212DH08 A4IFG0 P46196 E2REA7 M3YKX1 F6WBP0 F6S2I3 Q38QA2 | 11 |
| 67 | ko04216 | Ferroptosis                                 | D2HUG1 G9KFB9 L8I5R0 F1PEH9 F6PQ46 F6UAQ8 P27425 G1NW60 L5KZX6 Q9XT27                        | 10 |
| 68 | ko05016 | Huntington's disease                        | U6DJM0 D2H8J8 A0A1S3WPH6 Q0QEM6 U6DL12 Q712P4 E2R685 G1PK52 L5KEH1 S9XPD9                    | 10 |
| 69 | ko04210 | Apoptosis                                   | F1RYV9 A0A286ZR85 S7QBL1 A0A212CTH4 U6DIJ0 A0A2I2UUC6 A0A2F0BNX7 G1MGA9                      | 10 |

|    |         |                                              |                                                                                           |    |
|----|---------|----------------------------------------------|-------------------------------------------------------------------------------------------|----|
|    |         |                                              | P46196 Q38QA2                                                                             |    |
| 70 | ko04621 | NOD-like receptor signaling pathway          | S9YK27 U6CVR9 A0A287A9T4 U6DL12 K9KAF1 A0A287B8G6 I1WWX7 G9KCG8 D2I0Q3 P46196             | 10 |
| 71 | ko04212 | Longevity regulating pathway - worm          | W5P2C3 D2GY30 F1PKW7 A4IE76 A0A212D0T5 O97492 K9KGI2 G1MGA9 G1PK52 L5KEH1                 | 10 |
| 72 | ko04722 | Neurotrophin signaling pathway               | A0A2F0AZI2 A0A287ARU7 A0A1S3W7C2 A0A212CTH4 H2B2M1 A0A212BZC1 W5P5I7 Q29180 P46196 L5KN56 | 10 |
| 73 | ko00330 | Arginine and proline metabolism              | A0A0B4J194 M1EP96 A0A1S3W7D3 A0A1S3WP79 A0A286ZRC9 E2R134 G1MIK9 S7P787 I3LD43            | 9  |
| 74 | ko04540 | Gap junction                                 | F1RYV9 S7QBL1 L5LD96 A0A1S3W994 A0A212CTH4 A0A212CFU6 U6DL12 A0A2F0BNX7 P46196            | 9  |
| 75 | ko04062 | Chemokine signaling pathway                  | A0A2F0AZI2 A7E3V7 A0A1S3W7C2 A0A212CTH4 A0A212CFU6 U6DL12 K9KAF1 P46196 M3YU59            | 9  |
| 76 | ko04110 | Cell cycle                                   | D2GY30 F1PKW7 P68253 A0A212D1X2 A0A287ARU7 A4IE76 P68509 D7PVJ0 S7NAC1                    | 9  |
| 77 | ko04921 | Oxytocin signaling pathway                   | U6D230 A0A287A1E0 A0A212CTH4 A0A212CFU6 P60662 W5P5I7 U6DL12 P46196 Q38QA2                | 9  |
| 78 | ko04970 | Salivary secretion                           | U3L0J5 W5P5I7 A0A2F0BGA7 U6DL12 A0A287BF64 W5PDQ0 F1PRV8 G1L555 G5E5A7                    | 9  |
| 79 | ko04714 | Thermogenesis                                | U6DJM0 D2H8J8 A0A212BZC1 M3WHR6 D2HP68 Q0QEM6 F1PEH9 S9XPD9 Q38QA2                        | 9  |
| 80 | ko05142 | Chagas disease (American trypanosomiasis)    | U6DR03 A0A212CFU6 D2HFK4 U6DL12 D2HXP5 P46196 F7E454 J9PAN1 M3VUU7                        | 9  |
| 81 | ko00980 | Metabolism of xenobiotics by cytochrome P450 | A0A1S3WJ55 A0A212DH08 A4IFG0 E2REA7 F6WBP0 F6S2I3 M3W3A3 K9J596 U6CRF3                    | 9  |
| 82 | ko05152 | Tuberculosis                                 | W5P2C3 A0A1S3WR90 W5P5I7 K9KAF1 I1WWX7 K9KGI2 P46196 F7E454 G1QDJ7                        | 9  |
| 83 | ko00640 | Propanoate metabolism                        | U6DJV4 E2I6M4 A0A212C3P6 A0A2F0BIN9 U6DLA0 L8ISW3 G1LFA1 F1PVW0 Q7YS14                    | 9  |
| 84 | ko04360 | Axon guidance                                | G1NYU0 W5Q9P7 M3YID7 A0A1S3W7C2 A0A212CFU6 W5PA65 A0A287BQR7 A0A2F0BAE6 P46196            | 9  |
| 85 | ko05133 | Pertussis                                    | W5Q9P7 A0A212CFU6 W5P5I7 W5PA65 A0A2F0BAE6 P46196 F7E454 M3YGK4 S9YD43                    | 9  |



|     |         |                                                   |                                                                            |   |
|-----|---------|---------------------------------------------------|----------------------------------------------------------------------------|---|
| 86  | ko04013 | MAPK signaling pathway - fly                      | D2GY30 F1PKW7 L5JWP8 A4IE76 A0A212CTH4 D2HFK4 P46196 G1PK52 L5KEH1         | 9 |
| 87  | ko04022 | cGMP - PKG signaling pathway                      | U6D230 A0A212CTH4 A0A212CFU6 W5P5I7 A0A2F0BGA7 U6DL12 M3YN60 P46196 E2R685 | 9 |
| 88  | ko04120 | Ubiquitin mediated proteolysis                    | U6DT89 A0A212D1X2 A0A212DA06 A0A2F0B5P1 M3W0W9 U6E0X1 M1EL38 K9K1Z6 E2RGH5 | 9 |
| 89  | ko05204 | Chemical carcinogenesis                           | A0A1S3WJ55 A0A212DH08 A4IFG0 E2REA7 F6WBP0 F6S2I3 M3W3A3 S7NS57 U6CRF3     | 9 |
| 90  | ko05034 | Alcoholism                                        | L8IK69 A7E3V7 U6D230 A0A212CTH4 A0A212CFU6 S7PCZ7 W5P5I7 P46196 M3Z3Z5     | 9 |
| 91  | ko00982 | Drug metabolism - cytochrome P450                 | A0A1S3WJ55 A0A212DH08 A4IFG0 E2REA7 F6WBP0 F6S2I3 M3W3A3 U6CRF3 W5Q4K3     | 9 |
| 92  | ko00190 | Oxidative phosphorylation                         | U6DJM0 D2H8J8 U6DSW9 D2HP68 Q0QEM6 G9KHX5 I3LN55 S9XPD9                    | 8 |
| 93  | ko04919 | Thyroid hormone signaling pathway                 | A0A286ZU89 A0A212CTH4 M3WHR6 A0A2F0BGA7 U6DL12 K9KAF1 P46196 Q38QA2        | 8 |
| 94  | ko00280 | Valine, leucine and isoleucine degradation        | A0A1S3W2F0 A0A2F0BIN9 U6DLA0 L8ISW3 S9WTH0 G1LFA1 F6V5A0 W5Q4K3            | 8 |
| 95  | ko00250 | Alanine, aspartate and glutamate metabolism       | A0A0B4J194 M1EP96 U6DQ88 F1Q2N5 L7MRX7 D2H0F5 L8IWU2 K9KE65                | 8 |
| 96  | ko04140 | Autophagy - animal                                | D2H018 A0A212CTH4 U6DIJ0 D2HFK4 U6CY52 M3WHR6 Q6PZ03 P46196                | 8 |
| 97  | ko05167 | Kaposi's sarcoma-associated herpesvirus infection | A7E3V7 A0A286ZU89 A0A212CTH4 U6CY52 W5P5I7 K9KAF1 P46196 F7E454            | 8 |
| 98  | ko05230 | Central carbon metabolism in cancer               | A0A212CTH4 M3Z028 A0A1S3AMF1 B3IVM1 S7QAM2 I3PVS0 P46196 F1Q3S9            | 8 |
| 99  | ko05143 | African trypanosomiasis                           | U6DL12 A0A220IG95 I1WWX7 E2R2V4 G1QDJ7 P01962 P02058 P19645                | 8 |
| 100 | ko05162 | Measles                                           | U6DIJ0 L5JY48 L5JPT1 A0A1S3AA38 K9KAF1 L8II38 L8HNW7 G1QDJ7                | 8 |
| 101 | ko04014 | Ras signaling pathway                             | A7E3V7 G1NYU0 M3YID7 A0A1S3W7C2 A0A212CTH4 A0A1S3WR90 W5P5I7 P46196        | 8 |
| 102 | ko05414 | Dilated cardiomyopathy (DCM)                      | Q29219 F1P916 A0A2I2UUC6 G1L1K0 G1QDJ7 K9IX40 Q38QA2 S9X7J7                | 8 |

|     |         |                                                        |                                                                      |   |
|-----|---------|--------------------------------------------------------|----------------------------------------------------------------------|---|
| 103 | ko04152 | AMPK signaling pathway                                 | A0A287A1E0 D2HFK4 A0A2F0BP85 M3WHR6 D2HXP5 I3PVS0 F1Q3S9 M3WB78      | 8 |
| 104 | ko04350 | TGF-beta signaling pathway                             | A0A212D1X2 D2HFK4 D2HXP5 D2I7G0 P46196 F1SS26 M1EB47 W5QFP0          | 8 |
| 105 | ko05168 | Herpes simplex infection                               | A0A212D1X2 U6D230 U6DIJ0 L8HUB1 K9KAF1 A0A287B646 F7AJM6 F7E454      | 8 |
| 106 | ko05410 | Hypertrophic cardiomyopathy (HCM)                      | Q29219 F1P916 A0A2I2UUC6 G1L1K0 J9PAN1 K9IX40 Q38QA2 S9X7J7          | 8 |
| 107 | ko00052 | Galactose metabolism                                   | A0A212CX07 M3X654 D2H7H6 I3PVS0 Q9GKX6 S7PZQ3 S9X2V0 F1Q3S9          | 8 |
| 108 | ko00051 | Fructose and mannose metabolism                        | A0A1S3ALC7 A0A286ZYX8 F6W683 I3PVS0 F1Q3S9 K9J061 M3WB78 M3YMB2      | 8 |
| 109 | ko05412 | Arrhythmogenic right ventricular cardiomyopathy (ARVC) | M3YHH7 A0A286ZU89 A0A1S2ZD93 A0A2F0BKE6 A0A2I2UFC8 A0A2I2UUC6 Q38QA2 | 7 |
| 110 | ko04071 | Sphingolipid signaling pathway                         | M3YID7 A0A212CTH4 A0A212CFU6 D2HFK4 U6DL12 D2HXP5 P46196             | 7 |
| 111 | ko04391 | Hippo signaling pathway -fly                           | D2GY30 F1PKW7 A0A287ARU7 A4IE76 D2HFK4 D2HXP5 Q38QA2                 | 7 |
| 112 | ko04972 | Pancreatic secretion                                   | U6DGA9 A0A2F0BGA7 U6DL12 M3YN60 P00761 L5K4A2 P00921                 | 7 |
| 113 | ko05161 | Hepatitis B                                            | D2GY30 F1PKW7 A4IE76 A0A212CTH4 D7PVJ0 K9KAF1 P46196                 | 7 |
| 114 | ko04728 | Dopaminergic synapse                                   | A7E3V7 U6D230 A0A212CFU6 D2HFK4 W5P5I7 U6DL12 D2HXP5                 | 7 |
| 115 | ko04024 | cAMP signaling pathway                                 | M3YID7 U6D230 A0A212CTH4 A0A212CFU6 W5P5I7 A0A2F0BGA7 P46196         | 7 |
| 116 | ko04657 | IL-17 signaling pathway                                | A0A077KFB1 S9YK27 A0A287A9T4 A0A287BF64 P46196 G1L555 G5E5A7         | 7 |
| 117 | ko05166 | HTLV-I infection                                       | A0A286ZU89 G9KTH8 A0A2F0BNQ9 Q3T054 D7PVJ0 E2R685 M3VUU7             | 7 |
| 118 | ko03320 | PPAR signaling pathway                                 | A0A212C179 F7D6L7 A0A212CEE6 U6DLA0 A0A2I2UKG9 Q9TQX6 F1PEH9         | 7 |
| 119 | ko01524 | Platinum drug resistance                               | A0A1S3WJ55 A0A212DH08 A4IFG0 P46196 E2REA7 F6WBP0 F6S2I3             | 7 |
| 120 | ko04933 | AGE-RAGE signaling pathway in diabetic complications   | A0A1S3W7C2 U6DL12 K9KAF1 D2H8U8 C0HJN7 C0HJN8 P46196                 | 7 |
| 121 | ko04213 | Longevity regulating pathway - multiple species        | L5JPT1 A0A1S3AA38 L8HNW7 Q712P4 O97492 G1PK52 L5KEH1                 | 7 |
| 122 | ko05144 | Malaria                                                | A0A220IG95 I1WWX7 F1SS26 P01962 P02058 P19645 W5QFP0                 | 7 |

|     |         |                                          |                                                           |   |
|-----|---------|------------------------------------------|-----------------------------------------------------------|---|
| 123 | ko04974 | Protein digestion and absorption         | A0A2F0BGA7 P00761 A0A287BGV6 D2H8U8 C0HJN7 C0HJN8 M3WHG4  | 7 |
| 124 | ko05145 | Toxoplasmosis                            | L5JPT1 A0A212CFU6 A0A1S3AA38 F1PCD8 K9KAF1 L8HNNW7 P46196 | 7 |
| 125 | ko04072 | Phospholipase D signaling pathway        | A0A212CTH4 M3WHR6 U6DL12 P46196 G1QDJ7 U6DBP3             | 6 |
| 126 | ko04720 | Long-term potentiation                   | U6D230 A0A212CTH4 A0A212BZC1 W5P5I7 U6DL12 P46196         | 6 |
| 127 | ko04934 | Cushing's syndrome                       | A0A0D3L3J1 A0A286ZU89 A0A212CTH4 A0A212CFU6 U6DL12 P46196 | 6 |
| 128 | ko04931 | Insulin resistance                       | U6D230 A0A212BZC1 A0A2F0B0P2 D2H0F5 F6RV94 M3WGJ7         | 6 |
| 129 | ko04150 | mTOR signaling pathway                   | A0A212CM85 A0A212CTH4 U6DSW9 A0A212BZC1 M3WHR6 P46196     | 6 |
| 130 | ko05215 | Prostate cancer                          | A0A077KFB1 S9YK27 A0A286ZU89 A0A212CTH4 A0A287A9T4 P46196 | 6 |
| 131 | ko04971 | Gastric acid secretion                   | A0A212CFU6 W5P5I7 A0A2F0BGA7 U6DL12 G1LS78 P00921         | 6 |
| 132 | ko00260 | Glycine, serine and threonine metabolism | F6QTI9 A0A2F0BIN9 A0A212CZ82 M3Z028 S7QAM2 U6DQ23         | 6 |
| 133 | ko00860 | Porphyryn and chlorophyll metabolism     | A7LLN2 L8I5R0 F6PQ46 G1NW60 P52556 Q9XT27                 | 6 |
| 134 | ko04914 | Progesterone-mediated oocyte maturation  | S9YK27 A0A212CTH4 A0A212CFU6 A0A287A9T4 A0A212BZC1 P46196 | 6 |
| 135 | ko04218 | Cellular senescence                      | U6D230 A0A212CTH4 W5P5I7 M3WHR6 P46196 E2R685             | 6 |
| 136 | ko04138 | Autophagy - yeast                        | P61157 U6DIJ0 U6DIL8 D2HFK4 U6CY52 Q6PZ03                 | 6 |
| 137 | ko04978 | Mineral absorption                       | D2HUG1 A0A2F0BGA7 A0A2I2V4N5 F6UAQ8 P27425 L5KZX6         | 6 |
| 138 | ko04020 | Calcium signaling pathway                | U6DR03 W5P5I7 U6DL12 M3YN60 E2R685 G1QDJ7                 | 6 |
| 139 | ko04916 | Melanogenesis                            | A0A286ZU89 A0A212CTH4 A0A212CFU6 W5P5I7 U6DL12 P46196     | 6 |
| 140 | ko04730 | Long-term depression                     | A0A212CTH4 A0A212CFU6 D2HFK4 U6DL12 D2HXP5 P46196         | 6 |
| 141 | ko04626 | Plant-pathogen interaction               | A0A077KFB1 S9YK27 A0A212C179 A0A212CTH4 A0A287A9T4 W5P5I7 | 6 |
| 142 | ko05211 | Renal cell carcinoma                     | A0A2F0AZI2 A0A0D3L3J1 G1NYU0 A0A1S3W7C2 A0A212CTH4 P46196 | 6 |
| 143 | ko04260 | Cardiac muscle contraction               | Q29219 F1P916 A0A2F0BGA7 K9IX40 S9X7J7                    | 5 |

|     |         |                                           |                                                |   |
|-----|---------|-------------------------------------------|------------------------------------------------|---|
| 144 | ko04370 | VEGF signaling pathway                    | M3YID7 A0A1S3W7C2 A0A212CTH4 D2HM81 P46196     | 5 |
| 145 | ko04310 | Wnt signaling pathway                     | A0A286ZU89 M3YID7 A0A212D1X2 T0MHB2 U6DL12     | 5 |
| 146 | ko04725 | Cholinergic synapse                       | A7E3V7 A0A212CTH4 A0A212CFU6 U6DL12 P46196     | 5 |
| 147 | ko04726 | Serotonergic synapse                      | A7E3V7 A0A212CTH4 A0A212CFU6 U6DL12 P46196     | 5 |
| 148 | ko04912 | GnRH signaling pathway                    | A0A1S3W7C2 A0A212CTH4 W5P5I7 U6DL12 P46196     | 5 |
| 149 | ko04650 | Natural killer cell mediated cytotoxicity | M3YID7 A0A212CTH4 A0A2F0B3S0 P46196 G1QDJ7     | 5 |
| 150 | ko05160 | Hepatitis C                               | U6DIJ0 D2HFK4 K9KAF1 D2HXP5 P46196             | 5 |
| 151 | ko00720 | Carbon fixation pathways in prokaryotes   | A0A0D3L3J1 A0A0D3L3I9 P33198 G9K557 K9J2S6     | 5 |
| 152 | ko05212 | Pancreatic cancer                         | M3YID7 A0A1S3W7C2 A0A212CTH4 K9KAF1 P46196     | 5 |
| 153 | ko04068 | FoxO signaling pathway                    | A0A212CTH4 O97492 P46196 G1PK52 L5KEH1         | 5 |
| 154 | ko05020 | Prion diseases                            | Q3ZBZ8 A0A212CTH4 A0A212CW19 Q712P4 P46196     | 5 |
| 155 | ko04211 | Longevity regulating pathway - mammal     | A0A212CM85 M3WHR6 O97492 G1PK52 L5KEH1         | 5 |
| 156 | ko04011 | MAPK signaling pathway - yeast            | A7E3V7 A0A287ARU7 A0A1S3W7C2 O97492 P46196     | 5 |
| 157 | ko00220 | Arginine biosynthesis                     | A0A0B4J194 M1EP96 M1EBT9 F1Q2N5 K9KE65         | 5 |
| 158 | ko04662 | B cell receptor signaling pathway         | M3YID7 A0A212CTH4 A0A2F0B3S0 P46196 G1QDJ7     | 5 |
| 159 | ko04964 | Proximal tubule bicarbonate reclamation   | F1Q2N5 A0A2F0BGA7 K9K2D2 L5KT65 P00921         | 5 |
| 160 | ko00830 | Retinol metabolism                        | A0A287BRG6 M3W3A3 K9IKV2 M1EDX0 W5Q4K3         | 5 |
| 161 | ko05226 | Gastric cancer                            | M3YHH7 A0A286ZU89 A0A1S2ZD93 A0A212CTH4 P46196 | 5 |
| 162 | ko04962 | Vasopressin-regulated water reabsorption  | U6DIL8 A0A1S3WR90 Q29180 L5KN56 W5NYP8         | 5 |

|     |         |                                                           |                                                |   |
|-----|---------|-----------------------------------------------------------|------------------------------------------------|---|
| 163 | ko05216 | Thyroid cancer                                            | Q29219 A0A286ZU89 A0A212CTH4 P46196 S9X7J7     | 5 |
| 164 | ko03015 | mRNA surveillance pathway                                 | A0A2I2UMT1 G9K3I8 U6D230 D2HFK4 D2HXP5         | 5 |
| 165 | ko00071 | Fatty acid degradation                                    | F7D6L7 U6DLA0 L8ISW3 F1PEH9 M3W3A3             | 5 |
| 166 | ko05140 | Leishmaniasis                                             | A0A2F0B3S0 K9KAF1 P46196 F7E454 G1QDJ7         | 5 |
| 167 | ko04660 | T cell receptor signaling pathway                         | G1NYU0 A0A1S3W7C2 A0A212CTH4 A0A2F0B3S0 P46196 | 5 |
| 168 | ko00350 | Tyrosine metabolism                                       | A0A0B4J194 D2HRC4 M1EP96 M3W3A3 W5Q4K3         | 5 |
| 169 | ko04724 | Glutamatergic synapse                                     | A7E3V7 A0A212CFU6 U6DL12 P46196 K9KE65         | 5 |
| 170 | ko04713 | Circadian entrainment                                     | A7E3V7 A0A212CFU6 W5P5I7 U6DL12 P46196         | 5 |
| 171 | ko04630 | Jak-STAT signaling pathway                                | S7MXD2 A0A2F0B3S0 K9KAF1 G3MZ95 W5Q4K3         | 5 |
| 172 | ko04721 | Synaptic vesicle cycle                                    | U6DIL8 U6DSW9 A0A1S3WPH6 U6DBP3                | 4 |
| 173 | ko05110 | Vibrio cholerae infection                                 | L5LD96 U6DSW9 L5K0I9 Q38QA2                    | 4 |
| 174 | ko04723 | Retrograde endocannabinoid signaling                      | A7E3V7 A0A212CFU6 U6DL12 P46196                | 4 |
| 175 | ko04924 | Renin secretion                                           | A0A212CFU6 W5P5I7 U6DL12 J9PAN1                | 4 |
| 176 | ko04727 | GABAergic synapse                                         | A7E3V7 A0A212CFU6 U6DIL8 K9KE65                | 4 |
| 177 | ko00970 | Aminoacyl-tRNA biosynthesis                               | M1EP66 L7MR87 A0A212CT48 S7MMV3                | 4 |
| 178 | ko04550 | Signaling pathways regulating pluripotency of stem cells  | A0A286ZU89 A0A212CTH4 P46196 M1EB47            | 4 |
| 179 | ko04012 | ErbB signaling pathway                                    | A0A2F0AZI2 G1NYU0 A0A212CTH4 P46196            | 4 |
| 180 | ko05210 | Colorectal cancer                                         | A0A286ZU89 M3YID7 A0A212CTH4 P46196            | 4 |
| 181 | ko04115 | p53 signaling pathway                                     | F1SS26 F6YDZ0 S7NAC1 W5QFP0                    | 4 |
| 182 | ko00410 | beta-Alanine metabolism                                   | U6DLA0 L8ISW3 G1LFA1 E2R134                    | 4 |
| 183 | ko04961 | Endocrine and other factor-regulated calcium reabsorption | A0A1S3WPH6 A0A2F0BGA7 U6DL12 U6DBP3            | 4 |

|     |         |                                                  |                                         |   |
|-----|---------|--------------------------------------------------|-----------------------------------------|---|
| 184 | ko04142 | Lysosome                                         | H2B2M1 A0A1S3WPH6 S7PZQ3 L5LCL6         | 4 |
| 185 | ko04214 | Apoptosis - fly                                  | U6CXR8 G1MGA9 P46196 L5LKN6             | 4 |
| 186 | ko00040 | Pentose and glucuronate interconversions         | A0A212CX07 U6DJL2 K9KC76 K9J061         | 4 |
| 187 | ko04659 | Th17 cell differentiation                        | S9YK27 A0A287A9T4 K9KAF1 P46196         | 4 |
| 188 | ko04664 | Fc epsilon RI signaling pathway                  | M3YID7 A0A212CTH4 P46196 G1QDJ7         | 4 |
| 189 | ko01051 | Biosynthesis of ansamycins                       | A0A1S2ZXM8 K9IZ11 S7N064 S9XYV1         | 4 |
| 190 | ko05219 | Bladder cancer                                   | A0A212CTH4 P46196 F1SS26 W5QFP0         | 4 |
| 191 | ko05213 | Endometrial cancer                               | A0A286ZU89 A0A1S2ZD93 A0A212CTH4 P46196 | 4 |
| 192 | ko05231 | Choline metabolism in cancer                     | M3YID7 A0A212CTH4 M3WHR6 P46196         | 4 |
| 193 | ko00510 | N-Glycan biosynthesis                            | M1ET04 E2RQ08 S9X2V0                    | 3 |
| 194 | ko00760 | Nicotinate and nicotinamide metabolism           | G9KCG8 J9P673 W5Q4K3                    | 3 |
| 195 | ko01522 | Endocrine resistance                             | A0A212CTH4 P46196 M3WGD4                | 3 |
| 196 | ko00590 | Arachidonic acid metabolism                      | A0A1S2ZPT2 G9K8Y8 U6CRF3                | 3 |
| 197 | ko04930 | Type II diabetes mellitus                        | A0A1S3AMF1 B3IVM1 P46196                | 3 |
| 198 | ko04620 | Toll-like receptor signaling pathway             | A0A212CTH4 K9KAF1 P46196                | 3 |
| 199 | ko05214 | Glioma                                           | A0A212CTH4 W5P5I7 P46196                | 3 |
| 200 | ko00360 | Phenylalanine metabolism                         | A0A0B4J194 D2HRC4 M1EP96                | 3 |
| 201 | ko01521 | EGFR tyrosine kinase inhibitor resistance        | A0A212CM85 A0A212CTH4 P46196            | 3 |
| 202 | ko03410 | Base excision repair                             | D2H018 D7PVJ0 G1MGA9                    | 3 |
| 203 | ko01503 | Cationic antimicrobial peptide (CAMP) resistance | Q864L8 F6X6A6 S9YK31                    | 3 |

|     |         |                                                            |                              |   |
|-----|---------|------------------------------------------------------------|------------------------------|---|
| 204 | ko04113 | Meiosis - yeast                                            | U6D230 D2HFK4 D2HXP5         | 3 |
| 205 | ko04614 | Renin-angiotensin system                                   | M3W3E3 E2R2V4 J9PAN1         | 3 |
| 206 | ko04925 | Aldosterone synthesis and secretion                        | W5P5I7 A0A2F0BGA7 U6DL12     | 3 |
| 207 | ko04136 | Autophagy - other eukaryotes                               | D2HFK4 U6CY52 Q6PZ03         | 3 |
| 208 | ko00910 | Nitrogen metabolism                                        | F1Q2N5 K9KE65 P00921         | 3 |
| 209 | ko04745 | Phototransduction - fly                                    | W5P5I7 U6DL12 Q38QA2         | 3 |
| 210 | ko05221 | Acute myeloid leukemia                                     | M3YHH7 A0A212CTH4 P46196     | 3 |
| 211 | ko02026 | Biofilm formation - Escherichia coli                       | A0A2F0B0P2 F6RV94 M3WGI7     | 3 |
| 212 | ko05416 | Viral myocarditis                                          | M3YID7 G1QDJ7 Q38QA2         | 3 |
| 213 | ko05220 | Chronic myeloid leukemia                                   | A0A2F0AZI2 A0A212CTH4 P46196 | 3 |
| 214 | ko04625 | C-type lectin receptor signaling pathway                   | W5P5I7 K9KAF1 P46196         | 3 |
| 215 | ko05120 | Epithelial cell signaling in Helicobacter pylori infection | L5LD96 A0A1S3W7C2 U6DSW9     | 3 |
| 216 | ko00380 | Tryptophan metabolism                                      | L8ISW3 O97492 W5Q4K3         | 3 |
| 217 | ko04932 | Non-alcoholic fatty liver disease (NAFLD)                  | U6DJM0 A0A1S3W7C2 U6DIJ0     | 3 |
| 218 | ko04111 | Cell cycle - yeast                                         | A0A212D1X2 D2HFK4 D2HXP5     | 3 |
| 219 | ko04750 | Inflammatory mediator regulation of TRP channels           | U6D230 W5P5I7 U6DL12         | 3 |
| 220 | ko04016 | MAPK signaling pathway - plant                             | G1LN34 W5P5I7 O97492         | 3 |
| 221 | ko04080 | Neuroactive ligand-receptor interaction                    | E2RRM2 P00761 F1Q421         | 3 |

|     |         |                                           |                              |   |
|-----|---------|-------------------------------------------|------------------------------|---|
| 222 | ko05014 | Amyotrophic lateral sclerosis (ALS)       | Q712P4 O97492 S9XF58         | 3 |
| 223 | ko04380 | Osteoclast differentiation                | A0A212CTH4 K9KAF1 P46196     | 3 |
| 224 | ko05224 | Breast cancer                             | A0A286ZU89 A0A212CTH4 P46196 | 3 |
| 225 | ko04960 | Aldosterone-regulated sodium reabsorption | A0A2F0BGA7 P46196 S7NAC1     | 3 |
| 226 | ko05323 | Rheumatoid arthritis                      | U6DSW9 I1WWX7 G1QDJ7         | 3 |
| 227 | ko04917 | Prolactin signaling pathway               | A0A212CTH4 K9KAF1 P46196     | 3 |
| 228 | ko04514 | Cell adhesion molecules (CAMs)            | M1ET43 D2H6N0                | 2 |
| 229 | ko04740 | Olfactory transduction                    | A7E3V7 W5P5I7                | 2 |
| 230 | ko04668 | TNF signaling pathway                     | A0A212CTH4 P46196            | 2 |
| 231 | ko04966 | Collecting duct acid secretion            | U6DSW9 P00921                | 2 |
| 232 | ko04911 | Insulin secretion                         | A0A2F0BGA7 U6DL12            | 2 |
| 233 | ko05031 | Amphetamine addiction                     | U6D230 W5P5I7                | 2 |
| 234 | ko00561 | Glycerolipid metabolism                   | A0A212C179 U6DJL2            | 2 |
| 235 | ko04973 | Carbohydrate digestion and absorption     | A0A2F0BGA7 M3X654            | 2 |
| 236 | ko00340 | Histidine metabolism                      | A0A2F0BMN6 E2R134            | 2 |
| 237 | ko04658 | Th1 and Th2 cell differentiation          | K9KAF1 P46196                | 2 |
| 238 | ko00565 | Ether lipid metabolism                    | K9K2F8 S9XK88                | 2 |
| 239 | ko05223 | Non-small cell lung cancer                | A0A212CTH4 P46196            | 2 |
| 240 | ko00450 | Selenocompound metabolism                 | U6DQ23 M3YKX1                | 2 |
| 241 | ko00920 | Sulfur metabolism                         | E2R864 G1NT70                | 2 |
| 242 | ko04320 | Dorso-ventral axis formation              | A0A212CTH4 P46196            | 2 |



|     |         |                                                        |                       |   |
|-----|---------|--------------------------------------------------------|-----------------------|---|
| 243 | ko04060 | Cytokine-cytokine receptor interaction                 | I1WWX7 M3YU59         | 2 |
| 244 | ko04070 | Phosphatidylinositol signaling system                  | W5P5I7 U6DL12         | 2 |
| 245 | ko00513 | Various types of N-glycan biosynthesis                 | E2RQ08 S9X2V0         | 2 |
| 246 | ko00232 | Caffeine metabolism                                    | A0A212CXS3 A0A287AQU3 | 2 |
| 247 | ko00960 | Tropane, piperidine and pyridine alkaloid biosynthesis | A0A0B4J194 M1EP96     | 2 |
| 248 | ko00950 | Isoquinoline alkaloid biosynthesis                     | A0A0B4J194 M1EP96     | 2 |
| 249 | ko00512 | Mucin type O-glycan biosynthesis                       | D2HHE3 F1RZ66         | 2 |
| 250 | ko00562 | Inositol phosphate metabolism                          | A0A1S3ALC7 U6DL12     | 2 |
| 251 | ko00400 | Phenylalanine, tyrosine and tryptophan biosynthesis    | A0A0B4J194 M1EP96     | 2 |
| 252 | ko00670 | One carbon pool by folate                              | M1ECI9 A0A212C5Z2     | 2 |
| 253 | ko05032 | Morphine addiction                                     | A7E3V7 A0A212CFU6     | 2 |
| 254 | ko00730 | Thiamine metabolism                                    | K9J1I9 L5JRN4         | 2 |
| 255 | ko05202 | Transcriptional misregulation in cancers               | M3YHH7 G1QDJ7         | 2 |
| 256 | ko04976 | Bile secretion                                         | A0A2F0BGA7 P00921     | 2 |
| 257 | ko00940 | Phenylpropanoid biosynthesis                           | O77834 F7AXI9         | 2 |
| 258 | ko05218 | Melanoma                                               | A0A212CTH4 P46196     | 2 |
| 259 | ko00930 | Caprolactam degradation                                | U6DJL2 L8ISW3         | 2 |
| 260 | ko05321 | Inflammatory bowel disease                             | K9KAF1 I1WWX7         | 2 |

|     |         |                                       |               |   |
|-----|---------|---------------------------------------|---------------|---|
|     |         | (IBD)                                 |               |   |
| 261 | ko04744 | Phototransduction                     | A7E3V7 W5P5I7 | 2 |
| 262 | ko03420 | Nucleotide excision repair            | D7PVJ0        | 1 |
| 263 | ko04979 | Cholesterol metabolism                | H2B2M1        | 1 |
| 264 | ko04940 | Type I diabetes mellitus              | W5P2C3        | 1 |
| 265 | ko04622 | RIG-I-like receptor signaling pathway | M3WBB6        | 1 |
| 266 | ko02020 | Two-component system                  | K9KE65        | 1 |
| 267 | ko03060 | Protein export                        | A0A212CWI9    | 1 |
| 268 | ko05030 | Cocaine addiction                     | A0A212CFU6    | 1 |
| 269 | ko05310 | Asthma                                | G1QDJ7        | 1 |
| 270 | ko05330 | Allograft rejection                   | G1QDJ7        | 1 |
| 271 | ko00750 | Vitamin B6 metabolism                 | W5Q4K3        | 1 |
| 272 | ko00627 | Aminobenzoate degradation             | L8ISW3        | 1 |
| 273 | ko00053 | Ascorbate and aldarate metabolism     | K9KC76        | 1 |
| 274 | ko04139 | Mitophagy - yeast                     | D2HRD5        | 1 |
| 275 | ko05320 | Autoimmune thyroid disease            | G1QDJ7        | 1 |
| 276 | ko00310 | Lysine degradation                    | L8ISW3        | 1 |
| 277 | ko00515 | Mannose type O-glycan biosynthesis    | S9X2V0        | 1 |
| 278 | ko04975 | Fat digestion and absorption          | A0A0B4J194    | 1 |
| 279 | ko00062 | Fatty acid elongation                 | L8ISW3        | 1 |
| 280 | ko04341 | Hedgehog signaling pathway - fly      | A0A212D1X2    | 1 |
| 281 | ko04624 | Toll and Imd signaling pathway        | A0A1S3WNB6    | 1 |

|     |         |                                                            |        |   |
|-----|---------|------------------------------------------------------------|--------|---|
| 282 | ko00533 | Glycosaminoglycan biosynthesis - keratan sulfate           | S9X2V0 | 1 |
| 283 | ko00471 | D-Glutamine and D-glutamate metabolism                     | F1Q2N5 | 1 |
| 284 | ko04640 | Hematopoietic cell lineage                                 | G1QDJ7 | 1 |
| 285 | ko01523 | Antifolate resistance                                      | M1ECI9 | 1 |
| 286 | ko03008 | Ribosome biogenesis in eukaryotes                          | Q3T054 | 1 |
| 287 | ko04920 | Adipocytokine signaling pathway                            | F1PEH9 | 1 |
| 288 | ko00521 | Streptomycin biosynthesis                                  | D2H7H6 | 1 |
| 289 | ko00601 | Glycosphingolipid biosynthesis - lacto and neolacto series | S9X2V0 | 1 |
| 290 | ko00650 | Butanoate metabolism                                       | L8ISW3 | 1 |
| 291 | ko05340 | Primary immunodeficiency                                   | G1QDJ7 | 1 |
| 292 | ko00770 | Pantothenate and CoA biosynthesis                          | K9IKX5 | 1 |
| 293 | ko00061 | Fatty acid biosynthesis                                    | F1PEH9 | 1 |
| 294 | ko04623 | Cytosolic DNA-sensing pathway                              | I1WWX7 | 1 |
| 295 | ko00514 | Other types of O-glycan biosynthesis                       | S9X2V0 | 1 |
| 296 | ko04672 | Intestinal immune network for IgA production               | G1QDJ7 | 1 |
| 297 | ko04122 | Sulfur relay system                                        | G1NT70 | 1 |
| 298 | ko04927 | Cortisol synthesis and secretion                           | U6DL12 | 1 |

|     |         |                                           |            |   |
|-----|---------|-------------------------------------------|------------|---|
| 299 | ko00626 | Naphthalene degradation                   | M3W3A3     | 1 |
| 300 | ko04064 | NF-kappa B signaling pathway              | G1QDJ7     | 1 |
| 301 | ko03030 | DNA replication                           | D7PVJ0     | 1 |
| 302 | ko00740 | Riboflavin metabolism                     | P52556     | 1 |
| 303 | ko02010 | ABC transporters                          | F1PWW4     | 1 |
| 304 | ko04710 | Circadian rhythm                          | A0A212D1X2 | 1 |
| 305 | ko05217 | Basal cell carcinoma                      | A0A286ZU89 | 1 |
| 306 | ko03430 | Mismatch repair                           | D7PVJ0     | 1 |
| 307 | ko00240 | Pyrimidine metabolism                     | G1LN34     | 1 |
| 308 | ko00511 | Other glycan degradation                  | L5LCL6     | 1 |
| 309 | ko00790 | Folate biosynthesis                       | G9KJL9     | 1 |
| 310 | ko00900 | Terpenoid backbone biosynthesis           | G9KBY0     | 1 |
| 311 | ko00600 | Sphingolipid metabolism                   | L5LCL6     | 1 |
| 312 | ko04923 | Regulation of lipolysis in adipocyte      | A0A212CFU6 | 1 |
| 313 | ko05222 | Small cell lung cancer                    | F1PCD8     | 1 |
| 314 | ko04112 | Cell cycle - Caulobacter                  | A0A212D0T5 | 1 |
| 315 | ko02024 | Quorum sensing                            | F1PEH9     | 1 |
| 316 | ko00625 | Chloroalkane and chloroalkene degradation | M3W3A3     | 1 |

Table S2. The pathways and proteins enriched in intestinal juice of Sunda pangolin HS-04

| No. | Map_ID  | Map_Name                                    | Seqs                                                                                                                                                                                                                                                                                                                                                                                                                                                                                                                                                                                                                                                                                                                                                                                                                                                                                                  | Seqs_Num |
|-----|---------|---------------------------------------------|-------------------------------------------------------------------------------------------------------------------------------------------------------------------------------------------------------------------------------------------------------------------------------------------------------------------------------------------------------------------------------------------------------------------------------------------------------------------------------------------------------------------------------------------------------------------------------------------------------------------------------------------------------------------------------------------------------------------------------------------------------------------------------------------------------------------------------------------------------------------------------------------------------|----------|
| 1   | ko04141 | Protein processing in endoplasmic reticulum | Q2A135 Q9GKX7 D2H0R2 A0A212CLX0 Q9MZS6 A0A212CEB3 G9KMU6 Q04967 U6DL70 G9KRR7 A0A1S2ZFP2 L5JQ86 K9K2M0 M3X2J2 G9KRR6 G9L5J1 J9P906 Q32PD3 A0A1S2ZRZ8 F6Q638 M1EMG4 G1QFK7 L5JPT1 A0A1S3AA38 L5K1J6 L8J0X7 A0A1S3ADV1 A0A1S3AGT9 A0A212C0H4 S7MDX7 A0A287BELO M1EK42 A0A287A9T4 K7GPK2 G9KMU7 G1NUT2 A0A2F0BAG6 S9WMM0 A0A212C4A3 G9KMW0 A0A212C9D9 F7E2S8 A0A212CKY6 A0A212CT24 D2GVJ6 G9KIK4 A0A287A6X0 A0A212D1Q1 A0A212DB37 A0A287A6R6 L8IC82 G1PN32 A0A287B0H0 F1SAD9 A0A2F0AX35 A0A2I2UPQ6 A0A2I2UM04 A0A2I2UR06 A0A2I2V2Q8 Q9N0M7 S7PSE0 W5PMM7 M3Z7F7 B2KIQ0 B3RF11 D2HGC1 M3XTA2 M3Y7C5 L5M4P9 E1CAJ6 F7D6B3 E2RQ08 E2RR16 S4VA54 F1MWU9 L8I1A8 K9J3P9 G9KMS8 U6DPC1 F2Z5S3 F6PGW8 L5KA45 F6WGL8 F6WQI9 F6YG82 F6Z9A2 K9K284 F7C4D4 G1QGG2 G1P9V8 S7PUU6 G9K9U9 K9IL36 K9K2J3 L5JX99 L5K0I9 L5KG13 L5KIH3 L5KLP0 L5M3T4 L8IEQ9 L8IGR8 M3W668 M3WDP6 M3XE28 M3YQN2 S7Q8R8 S9XK10 S9YH06 W5PSK1 | 110      |
| 2   | ko05200 | Pathways in cancer                          | Q2A135 Q9GKX7 L5KX73 K9K3J6 Q9MZS6 A0A2F0AZI2 Q3S2Z6 Q6QA25 A7E3V7 A0A287AGH7 G1Q569 A0A287BBE2 U6DM87 Q2XTG2 M3YHH7 U6CT58 A0A1S2ZAZ4 L5LGV5 F6YQC6 F7DYP5 F1SMF4 M3X2J2 K9K296 M1EMM3 A0A1S3W7C2 A0A1S2ZUU4 A0A212C632 A0A1S3A4U9 S9YL01 L5K1J6 Q2KJA7 P61585 U6E0K5 Q1JPH2 L5KWL7 A0A287A9T4 J9NTH6 F6Y0D9 A0A1S3WW49 L5LNB4 M3YYR6 W5PP04 W5P5I7 A0A1S3WM25 M1ESH1 U6D317 A0A1S3WVF1 A0A212C3U9 A0A212C4F6 A0A212CB56 A0A212CGK0 W5PIJ4 M3WK78 J9P8M2 A0A212D7R3 U6D7Z2 A0A286ZY95 F1S4U9 A0A2F0B0W0 A0A2F0B4X1 A0A2F0B545 A5D9F0 L8IUW5 U6DFK3 A4IFG0 A5GFU4 C5I WV1 D2H4T8 F6ZBH0 D2H9H6 S9WYG5 F1MNT4 W5NUF2 K9J3P9 Q6Q2K4 M3YKX1 F1S663 F1Q0I8 F6WBP0 F6S2I3 F7BKK5 F7BU09 F7CBR0 M1ET54 S7NJT7 S7MQD4 L5KIE0 Q3T0E8 K9J6G7 G9K3K1 G9K7T4 W5PVT7 K9J536 L5KIH3 L5KW11 L8IEQ9 L8IMA9                                                                                                           | 102      |

|   |         |                      |                                                                                                                                                                                                                                                                                                                                                                                                                                                                                                                                                                                                                                                                                                                                                        |    |
|---|---------|----------------------|--------------------------------------------------------------------------------------------------------------------------------------------------------------------------------------------------------------------------------------------------------------------------------------------------------------------------------------------------------------------------------------------------------------------------------------------------------------------------------------------------------------------------------------------------------------------------------------------------------------------------------------------------------------------------------------------------------------------------------------------------------|----|
|   |         |                      | M3VUW7 S7Q8R8 S9WE42 S9X7J7 W5Q1C8                                                                                                                                                                                                                                                                                                                                                                                                                                                                                                                                                                                                                                                                                                                     |    |
| 3 | ko05016 | Huntington's disease | D2HIW8 Q6QRN9 Q2A135 B5LMI3 Q3S2Z6 G1Q569 G3LSY3 G3LSY2 W5NY50<br>A0A1S2ZBX7 A0A1S2ZJV1 U6DXX1 A0A1S2ZIQ2 U6D8A3 A0A1S2ZT41 A0A2F0BAA5<br>F1PT38 S9WVD5 G1PYC4 Q95283 G9KWP4 D7NXZ5 U6E0K5 K9KD93 F7DCS5 W5PJ73<br>K9K2M3 A0A1S3WT54 A0A212CB56 D7NY87 A0A212CHM0 D7NYC4 Q9N114 A0A212CVJ2<br>A0A212D011 Q02368 M3W7I2 F1SHD7 Q9TR28 B0LPM4 D2H766 A0A287AWV1<br>A0A287A8A8 F7BXM5 L5KJ87 A0A287BPW8 Q712P4 M3VZI9 A0A2F0BGR2 W5PW62<br>G9KCX4 Q8SQH5 M1EKI6 D2H4T8 D2HMD6 D2HU05 D2I0T0 D7NY18 D7NY71 D7NY90<br>L5LIQ8 M3Y083 U6CRD9 L5LYM4 Q0QEY2 Q0QEM6 F6QA35 F6SD71 G9KCX5 S7N665<br>K9K3E6 M3XPJ4 S7MQD4 G1PK52 U6DEP8 J9P1J9 K9IKF8 S9WQ82 Q0QF05 L5KBI4<br>L5KEH1 L8IXE8 M1F5E9 M3VUW7 M3W8B7 M3X1A3 Q0QEM7 S9WWE2                             | 88 |
| 4 | ko03010 | Ribosome             | L5JNM2 L8HU39 F6XNY6 D2H3Y2 Q6BDL8 Q8MKB9 A0A212DCS6 G8Z0E6 A0A0X7YBW5<br>A0A140GI28 F1PAJ4 S7QBD2 G1MPM4 M3Z606 F4YD27 P62866 L8IC36 A0A1S2ZIJ2<br>D2H1D2 A0A2F0AUS8 T0MGE2 G1MDE7 G9KLS2 A0A2F0AYL8 F6ZWW8 A0A2I2UQK1<br>W5PHJ8 Q861U5 O18789 Q3T087 F6QF58 W5P0I6 G1L2Q8 A0A287B2M3 Q30B77 L5LPX1<br>W5Q688 F6K453 A0A1S3ADS0 L5MFX6 A0A2F0BEP8 W5QF03 Q0QEW3 K9IQW1 S9YJF6<br>B3V273 F4YD28 S9XWJ3 A0A2F0BAM7 F1SMQ1 Q862D6 A0A2F0B3Y0 A0A212CWM6<br>F6YPU8 F1SJK6 A0A287AEG8 W5P114 W5IDB8 F1S935 A0A287B929 A0A287BG57<br>A0A287BNS9 A0A2F0B5K2 A0A2F0BNL7 A0A2F0BPD7 S9XEY5 A5YBN0 M3YFQ8<br>A0A2I2V2S7 D2HGN1 D2HNC8 L5M4P4 L8I8T5 E2R546 P82919 S9XN98 F7AKA4 S7Q1D8<br>S7PMI5 K9IIB4 L5KXQ3 L5LZ44 L5MDD1 S7NHL5 U6CXI3 M3Z8J1 S9YYT0 W5P0H3 | 88 |
| 5 | ko03040 | Spliceosome          | A0A287APY0 A0A286ZHW0 M1EME8 Q04967 G9L574 U6DW71 G9KSR1 U6DY96 M3Z0N6<br>D2GYU7 A0A212DGL1 U6DE26 M3YP72 G1PN55 M1ED81 A0A1S2ZPQ9 D2I291<br>A0A287AI22 D2HZR3 D2HDN1 A0A2F0BC73 U6D984 K9KA06 S7N570 L5JS34 A0A2F0B8R7<br>D2HX95 U6D7K2 K9KB22 M3W561 S7QAR2 L5JPT1 A0A1S3A4R2 J9P5Z8 L5MCV7<br>A0A1S3AA38 U6DXP8 L8HUB1 K9KAI8 L7MRW5 D2I575 U6E197 D2H2D9 S9Y6X1<br>A0A1S3AI50 D2HCW6 S9X714 U6D9S5 A0A2F0AUF1 A0A212DDH7 U6DQI2 A0A2I2V431                                                                                                                                                                                                                                                                                                         | 87 |

|   |         |                              |                                                                                                                                                                                                                                                                                                                                                                                                                                                                                                                                                                                                                                                                           |    |
|---|---------|------------------------------|---------------------------------------------------------------------------------------------------------------------------------------------------------------------------------------------------------------------------------------------------------------------------------------------------------------------------------------------------------------------------------------------------------------------------------------------------------------------------------------------------------------------------------------------------------------------------------------------------------------------------------------------------------------------------|----|
|   |         |                              | M3WCS4 A0A1S3W928 U6D6L2 D2HRD5 U6DR21 K9J6N8 G9KIQ7 A0A212CGM3 U6CQD8 U6D479 W5P1D8 A0A286ZK74 W5P4I9 B7TYH8 A0A2F0BNW8 A0A2I2UGS4 G1LB91 A0A2I2UM04 A0A2I2UYV3 M3Z7F7 D2HWP2 L8IC78 S4VA54 F1MWU9 F1S9D1 F7CNK0 G1Q3Z3 K9IHY2 K9IUZ3 K9J428 K9K2J3 L5K9T0 M3Z2Z0 S7NJI8 S9YAT6                                                                                                                                                                                                                                                                                                                                                                                          |    |
| 6 | ko05010 | Alzheimer's disease          | M1EDY4 B5LMI3 K9KFA1 Q3S2Z6 A0A212CU32 G1Q569 G3LSY3 G3LSY2 W5NY50 A0A1S2ZDG4 A0A1S2ZFP2 A0A1S2ZFP1 U6DXX1 F6QPD5 A9ZTJ9 A0A2I2V1R9 A0A1S3A1J4 Q95283 G9KWP4 D7NXZ5 L5KWL7 W5PJ73 W5P5I7 A0A212CB56 D7NY87 A0A212CHM0 D7NYC4 W5PIJ4 Q9N114 A0A212CVJ2 M3WK78 A0A212D011 Q02368 F1SHD7 Q9TR28 D2H766 F7BXM5 L5KJ87 K9IWW5 A0A287BPW8 M3VZI9 A0A2F0BGR2 G9KCX4 Q9N0M7 W5Q3Y4 U6DIX4 D2H4T8 D2HMD6 D2HU05 D2I0T0 M3YZM6 D7NY18 D7NY71 D7NY90 S7NE46 L8IHS5 L5LIQ8 M3Y083 U6CRD9 F5C3N2 L5LYM4 Q0QEY2 Q0QEM6 F6PGW8 F6QA35 F6SD71 G9KCX5 F6V5A0 S7N665 K9K3E6 M3XPJ4 S7MQD4 Q3T0E8 U6DEP8 G9KEQ1 J9P1J9 K9IKF8 Q0QF05 L8IXE8 M1F5E9 M3VUW7 M3W8B7 M3WDP6 M3X1A3 Q0QEM7 S9WWE2 | 86 |
| 7 | ko04510 | Focal adhesion               | K9K3J6 A0A2F0AZI2 K9IP89 Q2XTG2 G1NYU0 L5LGV5 M3WNL4 F1SMF4 W5PL19 A0A1S2ZLK7 C0HJN6 A0A1S3W7C2 G9KI46 U6DXA9 A0A212C632 D2H942 G9KI47 A0A1S3A810 Q2KJA7 P61585 L5KWL7 M3YYR6 A0A1S3WM25 A0A212C4F6 Q28194 M3WK78 J9P8M2 A0A212D7R3 A0A212DIT6 C6FGL2 F1SGJ3 A0A286ZY95 A0A287A0A6 A0A287A9P3 F7D2Z3 A0A291L897 A0A2F0B1P3 A0A2I2U654 L5KNC7 U6DLA9 U6DFK3 A0A2I2V2A4 M3WF12 B2KIJ4 C0HJN7 Q3ZBS7 G1LEN3 D2GX06 D2H2H6 F1PSC2 W5NZK9 E2R0F2 F1MNT4 L8I7T7 F1S663 F1PWW0 F6PGW8 F6QAT0 F6ZSZ5 F7CGV8 G1NW78 S7NJT7 S7MWU2 G1PQY9 G1Q555 G9K7T4 I3LUR7 J9P328 K9IQG3 K9IU88 K9IVD6 L5KBH6 L5LZ49 S7QGB7 L8HPL3 M3WDP6 M3WHG4 U6DT71 M3YZL1 S9WE42 S9XSM0 W5PTE9             | 82 |
| 8 | ko00010 | Glycolysis / Gluconeogenesis | A0A0B5GZG6 A0A0B5H3N2 A0A0D3L3N6 J9NU05 I3PVT3 U6D9C3 M3Z4A6 A0A1S3A1J4 M3Z028 I3RM61 A0A1S3AM12 K9IZ37 A0A1S3AMF1 A0A1S3AQK2 K9K3W3 A0A1S3WFI0 A0A1S3WSJ0 W5NUN8 K9KCM0 W5PPG3 A0A287BJI2 A0A287A1G6 D0G7F6 A0A2F0BG18                                                                                                                                                                                                                                                                                                                                                                                                                                                   | 79 |

|    |         |                                |                                                                                                                                                                                                                                                                                                                                                                                                                                                                                                                                                                                                                    |    |
|----|---------|--------------------------------|--------------------------------------------------------------------------------------------------------------------------------------------------------------------------------------------------------------------------------------------------------------------------------------------------------------------------------------------------------------------------------------------------------------------------------------------------------------------------------------------------------------------------------------------------------------------------------------------------------------------|----|
|    |         |                                | M3W1X4 A3RF36 W5P9I9 A6QPB5 B3IVM1 Q3T0P6 W5P323 D2H7H6 D2HFN2 S7MR26 D2HU88 M3YZM6 J9P208 E2R2C3 M3VXP7 F1PHR2 F1PUA2 F1PVW0 F1Q3S9 F6PXA5 F6U4P2 K9KB11 F7CZV6 F7D1R1 G1LHU6 M3YNR9 K9IUE2 G1PUD8 G9KEQ1 G9KFI3 I3LK50 I3LK68 K9IKY8 K9IM80 K9IMU0 K9J2H0 K9J5C1 L5KDF2 L5KQG7 L5KTT6 L5KU76 L5KYR8 L5LC88 W5P448 M1ED65 M3W3S8 M3W4B3 M3WB78 M3YMB2 M3WYA9 S9W8P0 S9WD75 S9WDQ9 T0NQQ8 W5QDD4                                                                                                                                                                                                                   |    |
| 9  | ko04714 | Thermogenesis                  | B5LMI3 K9K3J6 L5LH84 A0A287AGH7 G3LSY3 G3LSY2 A0A1C7A7L5 A0A2F0BFT8 W5NY50 F7DYP5 A0A1S2ZV1 U6DXX1 K4P0T7 Q95283 G9KWP4 D7NXZ5 W5QF03 D2HIV0 W5PJ73 A0A2F0BMA1 A0A212C888 D7NY87 A0A212CHM0 M1EFR9 D7NYC4 Q9N114 A0A212CVJ2 A0A212D011 Q02368 F1SHD7 Q9TR28 B0LPM4 D2H766 F7BXM5 A0A287AQX2 L5KJ87 A0A287BPW8 M3VZI9 A0A2F0BGR2 G9KCX4 A5GFU4 G1MAJ7 D2HMD6 D2HU05 D2I0T0 D2I296 D7NY18 D7NY71 D7NY90 L5LIQ8 M3Y083 U6CRD9 F1Q0U3 L5LYM4 Q0QEY2 Q0QEM6 F6QA35 Q68Y62 F6SD71 G9KCX5 S7N665 F6XKH9 K9K3E6 M3XPJ4 U6DEP8 J9P1J9 K9IKF8 K9IMX4 L5JZV3 Q0QF05 L8IXE8 M1F5E9 M3W8B7 M3X1A3 M3XZ84 Q0QEM7 S9WWE2 S9XSM0   | 78 |
| 10 | ko04151 | PI3K-Akt signaling pathway     | Q9GKX7 A0A212CM85 D2GY30 K9K3J6 F1PKW7 A7E3V7 Q2XTG2 F7DYP5 F1SMF4 P62262 M1EMM3 C0HJN6 A0A212C632 A0A1S3A810 U6DAZ5 G9KI77 Q2KJA7 A0A212CQB7 L5KA87 W5QF03 L5KWL7 K9KDB9 A0A287A9T4 M3YYR6 W5PP04 A0A1S3WM25 M1ESH1 A0A212C4F6 A0A212C888 Q28194 M3WK78 J9P8M2 A0A212D7R3 A0A286ZIM1 B0LPM4 A0A286ZY95 A0A287A0A6 D2HXP5 A0A291L897 M3X4B4 A0A2F0B4X1 L5KNC7 U6DFK3 J9NRH5 D2HLL8 P68509 D6MZW9 B5SRK4 C0HJN7 Q3ZBS7 D2H2H6 F1MNT4 L8I7T7 K9J3P9 F1S663 F6QAT0 F7CGV8 G1NW78 S7NJT7 G1PQY9 G1QDJ7 G1PZ23 G1PZY6 S7QHA4 G9K7T4 G9KFI3 G9KYF2 I3LUR7 K9IQG3 L5KIH3 L8IEQ9 L8IMA9 M3W4B3 M3WHG4 S7Q8R8 S9WE42 W5PTE9 | 77 |
| 11 | ko05165 | Human papillomavirus infection | Q2A135 K9K3J6 Q9MZS6 Q3S2Z6 A0A287AGH7 A0A0R4QSR6 Q2XTG2 C6F103 K9K4J3 L5LGV5 F7DYP5 F1SMF4 M1EMM3 C0HJN6 A0A1S3W7C2 A0A1S2ZUA8 B2KIF4 A0A2F0B0G2 A0A212C632 A0A1S3A810 U6DAZ5 G9KI77 Q2KJA7 A0A212CQB7 U6E0K5                                                                                                                                                                                                                                                                                                                                                                                                     | 76 |



|    |         |                     |                                                                                                                                                                                                                                                                                                                                                                                                                                                                                                                                                                                                                                      |    |
|----|---------|---------------------|--------------------------------------------------------------------------------------------------------------------------------------------------------------------------------------------------------------------------------------------------------------------------------------------------------------------------------------------------------------------------------------------------------------------------------------------------------------------------------------------------------------------------------------------------------------------------------------------------------------------------------------|----|
|    |         |                     | A0A212C0H4 F1S0R1 L5KA87 L5KWL7 A0A1S3AMF1 F6YBH2 A0A1S3WM25 A0A1S6Q3A1 A0A212C4F6 Q28194 M3WK78 J9P8M2 B0LPM4 A0A286ZY95 A0A287A0A6 D2HXP5 F7D2Z3 A0A291L897 A0A2F0B0W0 A0A2F0B1P3 A0A2F0B4X1 F2VYZ3 L5KNC7 U6DFK3 A5GFU4 B3IVM1 C0HJN7 Q3ZBS7 D2H2H6 F6ZBH0 G1L8B1 F1MNT4 L8I7T7 F1S663 F1PHR2 F6QAT0 F7CGV8 G1JRQ0 G1LHU6 G1NW78 S7NJT7 G1PHV0 G1PQY9 G9K7T4 I3LUR7 K9IQG3 M3XDB7 M3WHG4 M3WYA9 S9WE42 W5PTE9                                                                                                                                                                                                                     |    |
| 12 | ko04144 | Endocytosis         | Q04967 A0A0R4QSR6 A0A1S2ZBX7 F1PSK6 M3VYD8 K9K296 A0A1S3W7C2 A0A212CBE3 U6CU86 M3YK01 A0A1S2ZT41 A0A1S3WCL7 K9KB14 S7MXD2 A0A212DCY6 U6D4I7 F7C9B0 M1ED94 L5JPT1 E2R8A2 A0A287ALZ4 G1PYC4 G9KJV2 A0A1S3AA38 L8HXB6 P61585 U6DUF8 S9WJ12 A0A1S3WR90 U6DQ93 U6DN56 F7DCS5 A0A1S3AQU5 S9Y3X0 A0A1S3ASD9 K9KE00 U6DVI4 L5M5G5 A0A2I2UNJ1 A0A1S3WS17 A0A1S3WT54 K9KB53 A0A1S6Q3A1 A0A2F0AY65 A0A2F0BB02 A0A212D9M3 M1ER65 M3WCJ8 A0A2F0BHR8 F2VYZ3 A0A2I2U501 A0A2I2UM04 W5Q1R1 L8J1U4 W5QAY5 M3Z7F7 F7D301 U6DDQ9 U6DSG3 M1EKI6 M3YDR2 L8IEQ0 G9K7B3 S4VA54 F1MWU9 F1RWC5 T0NRI6 M3YJ42 K9J208 L5LKE3 K9K2J3 L5KJW2 L8IBW7 T0NJM7 U6DS89 | 75 |
| 13 | ko05012 | Parkinson's disease | D2HIW8 Q6QRN9 B5LMI3 Q3S2Z6 A0A287AGH7 G1Q569 G3LSY3 G3LSY2 A0A1C7A7L5 W5NY50 A0A1S2ZFV1 U6DXX1 A0A1S2ZIQ2 F7DKB2 S9YL01 Q95283 G9KWP4 D7NXZ5 W5PJ73 K9K2M3 D7NY87 A0A212CHM0 D7NYC4 Q9N114 A0A212CVJ2 A0A287A6X5 A0A212D011 Q02368 F1SHD7 K9K1Z6 Q9TR28 D2H766 F7BXM5 L5KJ87 A0A287BPW8 M3VZI9 A0A2F0B5C1 A0A2F0BAR8 A0A2F0BGR2 W5PW62 L8IUW5 G9KCX4 Q8SQH5 Q5E946 D2HMD6 D2HU05 D2I0T0 D7NY18 D7NY71 D7NY90 L5LIQ8 M3Y083 U6CRD9 L5LYM4 Q0QEY2 Q0QEM6 F6QA35 F6SD71 G9KCX5 S7N665 K9K3E6 M3VVK3 M3XPJ4 U6DEP8 J9P1J9 K9IKF8 Q0QF05 L5KBI4 L5L0T6 L8IXE8 M1F5E9 M3W8B7 M3X1A3 Q0QEM7 S9WWE2                                         | 75 |
| 14 | ko03013 | RNA transport       | A0A212CM85 G9KEC4 M3YMT1 A7E394 S9XBU4 B3EX57 A0A287ASR7 A0A212C8H7 K9K242 M3XW44 S9YB89 M3WR50 A0A2F0B9H9 U6D984 D2HA56 K9KA06 A0A2F0BML0 M1EMG4 A6YLM4 U6D0E4 D2HA67 U6CY59 A0A2F0AVY1 Q3T054 S9X9J7 F7DTB6                                                                                                                                                                                                                                                                                                                                                                                                                        | 73 |

|    |         |                              |                                                                                                                                                                                                                                                                                                                                                                                                                                                                                                                                                         |    |
|----|---------|------------------------------|---------------------------------------------------------------------------------------------------------------------------------------------------------------------------------------------------------------------------------------------------------------------------------------------------------------------------------------------------------------------------------------------------------------------------------------------------------------------------------------------------------------------------------------------------------|----|
|    |         |                              | A0A287AP48 K9KAI8 G9KWN2 A0A2I2UP91 D2I575 U6D3I0 S7Q5D5 K9KC79 A0A2I2V431 L5KT76 M3WC43 A0A1S3WBF3 D2HV73 K9J6N8 D2HAI8 S7NUA8 D2HRX3 A0A2F0BBH0 A0A2F0BNW8 A0A2I2UGS4 M3Z2J7 A0A2I2UZT3 D2H292 D2H2A5 S9WYG5 D2I1J7 E2RER1 S7PB61 L5K2Z1 Q7YS39 M3YH60 G9KMS8 M3YV16 F1S9D1 F6SM82 G1PCI7 K9J6G7 L5K2F4 L5KA68 L5KB26 L8IKP2 M3VV16 M3WJN2 S7NJI8 S7PRE6 S9YAT6 T0NNB1                                                                                                                                                                                |    |
| 15 | ko05169 | Epstein-Barr virus infection | D2GY30 F1PKW7 A0A2C9F3D9 U6DMG0 A0A287AGH7 Q04967 A8YXY1 A0A287BBE2 A0A1S2ZGP7 G1NSY2 P62262 U6DJ81 K9K296 U6D8A3 G9KHR5 D2HSA3 A1L5B1 F1PT38 B2KIF4 L5JPT1 Q3T054 S9WVD5 A0A1S3A7R2 F7DG14 A0A1S3AA38 G9KIZ3 A0A2F0BER8 U6E0K5 A0A1S3AIU8 N0E6I4 A0A2I2D9M9 L5KT76 K9KE00 J9NRI0 A0A1S6Q3A1 L5LY32 M3W7I2 A0A286ZIM1 A0A286ZLH1 W5P8Z3 M3X4B4 D2HM81 A0A2F0B4X1 F2VYZ3 A0A2I2UA05 A0A2I2UM04 M3Z7F7 J9NRH5 D2HLL8 P68509 M3YAK7 S4VA54 F1MWU9 W5NUF2 W5Q2N2 P62197 L5LRW2 G1QDJ7 G1PZ23 G1PZY6 S7QHA4 G9KYF2 K9IYH1 K9K2J3 M3XDB7 M3XZZ1 S9WKD7 W5PFU1 | 68 |
| 16 | ko00190 | Oxidative phosphorylation    | B5LMI3 A0A2I2C394 G3LSY3 G3LSY2 A0A1C7A7L5 W5NY50 U6D6R9 A0A1S2ZDV1 A0A2F0B6Q1 U6DXX1 A0A2I2CV04 Q95283 G9KWP4 D7NXZ5 F1S0R1 F6Y4J0 A0A2I2CD21 W5PJ73 D7NY87 A0A2I2CHM0 M1EFS0 D7NYC4 Q9N114 A0A2I2CVJ2 A0A2I2D011 Q02368 F1SHD7 Q9TR28 D2H766 F7BXM5 L5KJ87 A0A287BPW8 M3VZI9 A0A2F0BGR2 G9KCX4 D2HMD6 D2HU05 D2I0T0 D7NY18 D7NY71 D7NY90 L5LIQ8 M3Y083 U6CRD9 L5LYM4 Q0QEY2 Q0QEM6 F6QA35 F6SD71 G9KCX5 S7N665 K9K3E6 G1LJY0 M3XPJ4 U6DEP8 I3LN55 J9P1J9 K9IKF8 K9IZI8 Q0QF05 L8IXE8 M1F5E9 M3W8B7 M3X1A3 Q0QEM7 S7PKS0 S9WWE2                        | 67 |
| 17 | ko00071 | Fatty acid degradation       | A0A0B5GZG6 A0A0B5H3N2 Q52PF6 A0A2F0BFT8 M3Z4A6 A0A1S3AQK2 A0A1S3WFI0 M1EJZ4 K9KAF6 W5PPG3 A0A286ZXI1 U6D0R5 A0A287AQX2 A0A2C9F3C3 A0A2F0B6C5 A0A2I2UME7 Q29554 G1MAJ7 D2GXN9 G1MHF7 U6DPX0 D2HFN2 D2HJA7 G1MDJ2 D2HY86 D2I296 E2QXA3 F1Q0U3 Q08D92 F1PAZ6 F1PIP0 Q68Y62 K9K3H2 F6XKH9 F7C3J5 F7CZV6 M3XEK3 G1LTX1 L5LN07 K9IJL5 K9IKY8 K9IM30 K9IMX4 K9K2H8 L5JZV3                                                                                                                                                                                      | 65 |

|    |         |                                  |                                                                                                                                                                                                                                                                                                                                                                                                                                                                                                                     |    |
|----|---------|----------------------------------|---------------------------------------------------------------------------------------------------------------------------------------------------------------------------------------------------------------------------------------------------------------------------------------------------------------------------------------------------------------------------------------------------------------------------------------------------------------------------------------------------------------------|----|
|    |         |                                  | L5K4I7 L5KTT6 L5KYR8 L5LC88 L5MDE3 M1ECB8 M1ED65 M1EFG8 M3W762 M3WGX6 M3WMB8 M3XZ84 P79274 S7N9Y3 S9WD75 S9XGB2 S9XZR9 S9YMJ8 T0MCJ9 T0MFV8                                                                                                                                                                                                                                                                                                                                                                         |    |
| 18 | ko04810 | Regulation of actin cytoskeleton | A0A2F0AZI2 K9IP89 Q2XTG2 G1NYU0 J9NSU4 F7DYP5 M3WNL4 A0A1S2ZFJ0 W5Q9P7 F1SMF4 W5PL19 M3VYD8 K9J1H5 A0A1S3W7C2 M3YK01 G9KI46 G9KI47 A0A287ALZ4 A0A1S3ABM4 P61585 A0A1S3AH28 L5KWL7 A0A1S3AQS0 S9Y3X0 U6DVI4 M3YYR6 W5PP04 U6D317 K9K4N2 M3WK78 J9P8M2 C6FGL2 A0A286ZY95 A0A287A9P3 L8IJT7 F7D2Z3 A0A2F0B1P3 A0A2F0BAE6 L5KNC7 A0A2I2UPY7 U6DFK3 A0A2I2UZT3 G3X6T2 U6DSG3 T0MIA6 D2H7V0 L5JWP8 L8II38 F6YRC5 F6ZSZ5 S7NJT7 G1Q555 K9ILK2 K9IPA6 K9IQG3 K9IU88 K9IVD6 L5KJW2 S7QGB7 L8HPL3 M3W3G0 S7NKD6 S7PRE6 S9XSM0 | 64 |
| 19 | ko04146 | Peroxisome                       | U6CZF8 A0A0D3L3I9 A0A0D3L3J9 A0A2F0BFT8 A0A1S2ZMZ9 E2RHG2 Q32L71 A0A1S3AFE9 A0A2F0BE96 A0A1S3AKG6 A0A1S3WG49 G1NXQ4 L8IL33 A0A287A8A8 A0A287AQX2 Q712P4 M3VXR8 A0A2I2UME7 D2H159 W5PMT0 C6KGS5 G1MAJ7 G1MHF7 U6DPX0 D2H2E7 G9L1A3 F1Q0U3 E2RQL6 F1RS83 R4HZ39 F6Q4C8 F6R7L1 G1LCL2 G1LTX1 S7NT98 S7NIK8 G1P5H8 S7P8I2 G1PK52 G1PRH7 M3XP30 G9K557 U6DX53 K9IM30 K9IMX4 L5JZV3 L5K352 M3VY35 L5KEH1 L5L3G1 L5M5A2 L5MDE3 L8IU61 M1ECB8 M3W762 M3WMB8 M3YZN5 O97492 Q6RFZ6 T0MFV8 T0NUA4 T1QFY4 U6CSC4                | 63 |
| 20 | ko05203 | Viral carcinogenesis             | Q2A135 D2GY30 K9K3J6 Q9MZS6 Q3S2Z6 F1PKW7 A0A287AGH7 K9IP89 A0A0K0QRG9 A0A287BBE2 U6D6R9 F7DYP5 P62262 M1EMM3 A0A1S3W7C2 B2KIF4 A0A2F0B0G2 P61585 A0A2I2UQ03 U6E0K5 A0A1S3AH28 L5KWL7 A0A1S3AMF1 M3YYR6 A0A1S6Q3A1 U6D6D8 M3WK78 L5LY32 A0A2F0BKC4 A0A287BA60 B0LPM4 F7D2Z3 A0A2F0B1P3 A0A2F0B4X1 F2VYZ3 A0A2I2UA05 G1LB91 G3X6T2 J9NRH5 D2HLL8 P68509 B3IVM1 T0MIA6 G1L8B1 F1MUU9 F1PHR2 I3LTB8 F7BLE3 F7E454 G1LHU6 G5E6I9 G9KYF2 K9IU88 K9IVD6 L5KBI4 L5L7S9 L8HPL3 L7N1L3 L8IS77 M3W3G0 M3WYA9 M3Z3Z5           | 62 |
| 21 | ko04145 | Phagosome                        | W5NPE8 A0A287A4A5 A0A212C394 Q2XTG2 U6D6R9 A0A2F0B6Q1 F1SMF4 L5L1N0 G1MD73 F6SMP0 A0A212CV04 A0A1S3A1Q0 G9KJV2 U6D3G3 A0A1S3WR90 F1S0R1 S7MDX7 F7BYV5 F6Y4J0 A0A212CD21 L5M5G5 M3YYR6 G1NUT2 A0A1S3WH34 G9KVY5 L8ITP8 A0A1S6Q3A1 M1EFS0 Q28194 A0A286ZIM1 M3X4B4 A0A2F0BIM6 A0A2F0BNX7                                                                                                                                                                                                                              | 62 |

|    |         |                                            |                                                                                                                                                                                                                                                                                                                                                                                                                                                                                                |    |
|----|---------|--------------------------------------------|------------------------------------------------------------------------------------------------------------------------------------------------------------------------------------------------------------------------------------------------------------------------------------------------------------------------------------------------------------------------------------------------------------------------------------------------------------------------------------------------|----|
|    |         |                                            | F2VYZ3 F6XCF2 D2HBT8 D2HGC1 E1BDX8 H8ZYZ4 F1RRP1 I3LTB8 F2Z5S3 F7BLE3 F7E454 G1QDJ7 G1PZ23 G1PZY6 S7QHA4 L5LWP7 M3YJ42 L5L7S9 L7N0G4 L7N1L3 L8IXT8 M3VV17 M3WFX6 M3XUR8 S7PKS0 S7PWQ4 S9XK10 S9XSM0 U6DS89                                                                                                                                                                                                                                                                                     |    |
| 22 | ko05205 | Proteoglycans in cancer                    | A0A287APY0 K9K3J6 Q3S2Z6 A0A287AGH7 A0A287BBE2 Q2XTG2 L5LGV5 F7DYP5 F1SMF4 K9J1H5 A0A1S2ZLK7 A0A1S3W7C2 G9KI46 A0A2I2V1R9 A0A212D8Q1 G9KI47 A0A1S3A810 P61585 W5QF03 L5KWL7 A0A1S3AQS0 D7NPV5 M3YYR6 U6D317 Q28194 M3WK78 J9P8M2 A0A212D7R3 C6FGL2 F1SGJ3 A0A286ZY95 S9XDR3 F7D2Z3 A0A2F0B0W0 A0A2F0B1P3 A5D9F0 M3WF12 G9K8Z7 B2KIJ4 Q3ZBS7 G1LEN3 D2GX06 D2H7V0 D2HCA8 W5NZK9 E2R0F2 F1MER7 W5NUF2 F1PWW0 L8II38 F6YRC5 S7NJT7 S7MWU2 G1PNM3 K9ILK2 L5KE51 S7QGB7 M3W1X6 M3YZL1 S7MI38 S9XSM0 | 61 |
| 23 | ko04530 | Tight junction                             | A0A286ZUS1 P61157 A0A287AGH7 K9IP89 A0A0R4QSR6 Q2XTG2 Q9XSU1 L5L1N0 W5PL19 L5LOU4 A0A1S2ZML6 A0A1S3W7C2 A0A1S2ZUA8 K4P0T7 G9KI77 P60662 P61585 L5KA87 D7PVJ0 M3Y473 K9KE00 F6YBH2 M3YYR6 A0A2I2U7T2 A0A212C888 A0A212CET4 W5PMF3 D2HXP5 A0A2F0B3B4 A0A2F0BNX7 A0A2I2U5G3 S7PF41 F1MM57 Q258K2 L8II38 M3YFX2 G1Q555 I3LIE3 J9NU82 J9P328 K9ILK2 K9IU88 K9IV43 K9IVD6 K9IVZ8 K9IW00 L5LM48 L5LVS0 L8HPL3 L7N0G4 L8IXT8 L8J4S1 M3VV17 M3WFX6 U6DT71 S7PWQ4 S9W5G9 S9XHY8 S9XSM0 W5Q4J3            | 60 |
| 24 | ko00230 | Purine metabolism                          | O18730 S7NNG3 A0A287AR68 A0A2F0B2S3 U6D8A3 G9KHR5 A0A1S2ZSK5 F1PT38 A0A212C7R2 S9WVD5 A0A212CC90 A0A1S3AMF1 A0A1S3ANF8 A0A212D6G6 A0A212C536 A0A212CKW4 M3W7I2 U6DX68 A0A212D6Z1 L5KWS6 A4Z6H0 G9KE97 G1L1E2 M1ES58 W5PMT0 L5M996 A6QP5 B3IVM1 D2H7H6 M1EKS2 F1PUU7 F1P797 F1PHR2 U6CSX7 R4HZ39 F1S6K5 F6RYZ0 K9KAF7 F6XLG0 K9KB11 F7AJ54 L5K5T4 G1LCL2 G1LHU6 G1NYN6 K9IUE2 K9J5B5 L5JRN4 L5JXN2 L5JYI0 L5KWC7 M3W2V6 M3WYA9 M3YBU1 Q0VCK0 Q28254 S9WKD7 S9WT32 W5PKN0                        | 59 |
| 25 | ko00280 | Valine, leucine and isoleucine degradation | D2I0N2 A0A0B5H3N2 Q52PF6 A0A287AFU8 A0A1S3W2F0 M3Z4A6 G3X6Y6 A0A1S3AQK2 A0A1S3WFI0 A0A2F0BF15 M3XFH2 A0A1S3WN71 M1EJZ4 L5LE60 K9KAF6 A0A2F0BCV1 A0A286ZMM3 W5PPG3 A0A287A5W1 U6D0R5 A0A2C9F3C3 A0A2I2U3Z6 F6ZEY5 Q29554                                                                                                                                                                                                                                                                        | 58 |

|    |         |                                           |                                                                                                                                                                                                                                                                                                                                                                                                                    |    |
|----|---------|-------------------------------------------|--------------------------------------------------------------------------------------------------------------------------------------------------------------------------------------------------------------------------------------------------------------------------------------------------------------------------------------------------------------------------------------------------------------------|----|
|    |         |                                           | D0G773 D2GXN9 G1MHF7 U6DPX0 D2HCQ9 D2HFN2 D2HY86 G1LFA1 F1PAZ6 F1PBE6 F1PIP0 F6Q4C8 K9K3H2 F6V5A0 F7CZV6 M3XEK3 L5LN07 K9IJL5 K9IKY8 K9K2H8 L5K1H5 L5K4I7 L5KTT6 L5KYR8 L5LN36 M1ED65 M1EFG8 M3W762 M3WGX6 Q2TBR0 S7N9Y3 S9XGB2 S9XZR9 S9YMI8                                                                                                                                                                      |    |
| 26 | ko04932 | Non-alcoholic fatty liver disease (NAFLD) | Q2A135 B5LMI3 Q3S2Z6 G1Q569 G3LSY2 A0A1S2ZVF1 U6DXX1 A0A1S3W7C2 M1EMG4 K4P0T7 Q95283 G9KWP4 W5PJ73 M3YYR6 A0A212C888 D7NY87 A0A212CHM0 D7NYC4 W5PIJ4 Q9N114 A0A212CVJ2 A0A212D011 Q02368 F1SHD7 Q9TR28 D2H766 F7BXM5 L5KJ87 A0A287BPW8 M3VZI9 A0A2F0B4X1 G9KCX4 D2HU05 D2I0T0 D7NY71 D7NY90 L5LIQ8 U6CRD9 L5LYM4 Q0QEY2 F6QA35 F6SD71 G9KCX5 S7N665 U6DEP8 J9P1J9 K9IKF8 Q0QF05 L8IXE8 M1F5E9 M3W8B7 M3X1A3 S9WWE2 | 53 |
| 27 | ko04010 | MAPK signaling pathway                    | K9K3J6 A0A2F0AZI2 Q3S2Z6 U6DMG0 A0A287AGH7 Q04967 K9IRF1 G1NYU0 F7DYP5 F1MYC4 F6QPD5 K9J1H5 A0A1S2ZLK7 A9ZTJ9 K9K296 A0A1S3W7C2 D2H942 L5JPT1 A0A1S3AA38 L5KWL7 A0A2F0BMA1 M3YYR6 W5PP04 U6D317 M3WK78 A0A212D7R3 L5KRT7 U6D7Z2 F1SGJ3 D2HM81 A0A2F0B4X1 A0A2I2UM04 M3WF12 M3Z7F7 B2KIJ4 G1LEN3 D2GX06 D2H7V0 F1PV61 W5NZK9 E2R0F2 S4VA54 F1MWU9 F1PWW0 S7MWU2 H9LBN5 K9J183 K9K2J3 L5KJ27 L8IMA9 M3YZL1           | 51 |
| 28 | ko03320 | PPAR signaling pathway                    | W5Q4A5 A0A2F0BFT8 A0A0N9DRK7 U6DXA9 A0A1S3A1Q0 G1P8V1 A0A287AQX2 A0A2I2U6R0 A0A2I2UME7 K7GLW0 Q30B88 C7E3N6 G1MAJ7 G1MHF7 U6DPX0 D2H2E7 D2HC77 D2HJA7 D2I296 F1Q0U3 Q08D92 U6CRR3 Q9TQX6 F6R7L1 Q68Y62 F6XKH9 F7DYX5 M3XEK3 G1LTX1 J7FAN4 G1P5H8 G9KFI3 K9IM30 K9IMX4 L5JZV3 L5K4I7 M3VY35 L5MDE3 M1ECB8 U6CSA0 M3W4B3 M3W762 M3WMB8 P0DM92 M3XZ84 M3YZN5 P0DMA9 P79274 S9XGB2 T0MFV8                              | 50 |
| 29 | ko00620 | Pyruvate metabolism                       | A0A0B5H3N2 A0A0D3L3M5 A0A0D3L3N6 A0A0F7QHG6 J9NU05 U6D9C3 A0A1S2ZT56 M3Z4A6 A0A2F0B4Q3 K9IZ37 A0A1S3AMF1 A0A1S3AQK2 K9K3W3 A0A1S3WFI0 A0A1S3WSJ0 W5PPG3 U6D0R5 A0A2F0B098 W5P9I9 B3IVM1 C5IWV1 D2H9H6 D2HFN2 D2HU88 Q0QF26 J9P208 F1PHR2 F1PUA2 F1PVW0 F7CZV6 G1LHU6 G1PUD8 G9KFI3 K9IKY8 U6DI20 L5KT65 L5KTT6 L5KYR8 W5QFQ0 M1ED65 M3W4B3 M3W4G8 M3WGX6                                                           | 49 |

|    |         |                                             |                                                                                                                                                                                                                                                                                                                                                                                  |    |
|----|---------|---------------------------------------------|----------------------------------------------------------------------------------------------------------------------------------------------------------------------------------------------------------------------------------------------------------------------------------------------------------------------------------------------------------------------------------|----|
|    |         |                                             | M3WYA9 U6DVI2 Q0QF27 Q29RK2 S9XZR9 S9YMI8                                                                                                                                                                                                                                                                                                                                        |    |
| 30 | ko05168 | Herpes simplex infection                    | W5NPE8 Q3S2Z6 G1Q569 A0A0D5BWD2 L5KJF2 M3X2J2 G1NSY2 K9K296 U6D8A3 D2HSA3 G9KI46 M1EMG4 U6D0E4 A0A212D8Q1 G9KI47 L8HUB1 L5K1J6 A0A212D4P5 U6E197 W5P7J4 S9Y6X1 A0A1S3AI50 N0E6I4 U6D9S5 A0A1S3WH34 A0A1S6Q3A1 L5LY32 A0A287AWP8 C6FGL2 D2HDN5 A0A2F0B4X1 A0A2F0BBU4 A0A2F0BIM6 F2VYZ3 G1LB91 D2H306 F6ZBH0 H8ZYZ4 Q6R757 I3LTB8 F7AJM6 F7BLE3 F7E454 U6D6A6 M3XDB7 L5L7S9 L7N1L3 | 47 |
| 31 | ko00520 | Amino sugar and nucleotide sugar metabolism | L7MRM8 A0A1S2ZRS1 L5M7B1 W6FSS0 M3W4K3 L5LFR5 M3WNV6 W5Q563 A0A212CG51 A0A287B759 A0A286ZIL5 F1MZY2 A0A287A1G6 F6W683 W5NUG3 W5PEK5 D2HVL9 A6QPB5 W5P323 D2H7H6 D2HDQ1 D2HHV4 E2R1D1 E2R2C3 E2R311 L8HRW8 F6PXA5 F6PZ12 K9KB11 M1ESZ8 M1ESY4 G1LGG0 M3VXM4 G1NZF0 G1PBK3 K9IUE2 G9K475 K9IM80 K9IXM9 L5KDF2 L5KEY5 M3W3S8 M3WBQ9 M3YV42 W5P5K7 S9WLV8                            | 46 |
| 32 | ko05146 | Amoebiasis                                  | Q3S2Z6 A0A287AGH7 K9IP89 G9KN52 C0HJN6 A0A1S2ZUU4 A0A212C632 G9KJV2 Q2KJA7 A0A1S3WR90 A0A1S3WM25 A0A1S3WT45 A0A212C4F6 A0A212CB56 J9P8M2 A0A212D7R3 A0A286ZIM1 A0A286ZT61 A0A286ZY95 S9WA76 M3X4B4 D2HM81 A0A2F0B4X1 D2GWX2 A5GFU4 C0HJN7 D2H4T8 F1MNT4 F1S663 F6ZSZ5 M1ET54 G1NW78 S7NJT7 S7MQD4 G1QDJ7 G1PZ23 G1PZY6 S7QHA4 G9K7T4 K9IU88 K9IVD6 L8HPL3 M3VUW7 S9WE42 U6DS89   | 45 |
| 33 | ko00020 | Citrate cycle (TCA cycle)                   | A0A0D3L3C7 A0A0D3L3G0 A0A0D3L3F4 A0A0D3L3I9 A0A0D3L3L8 A0A0D3L3J9 A0A0D3L3M5 A0A0D3L3N6 A0A0D3L3U2 A0A0D3L3W7 A0A2F0B9S3 A0A1S3AHW1 K9IZ37 K9K3W3 D2HL13 A0A212CHM0 L8IL33 K9INM5 M3WCZ2 W5PL67 C5I WV1 D2H9H6 D2HIS1 Q0QF26 G1MJ14 J9P208 Q0QEY2 L5LX72 G9K557 G9KFI3 L5K352 Q0QF05 L5KT65 L5KUZ8 L5L3G1 L5M5A2 W5QFQ0 M3W4B3 U6DVI2 U6CVN2 Q0QEK5 Q0QF27 Q29RK2 T1QFY4 W5QAA9  | 45 |
| 34 | ko04611 | Platelet activation                         | A0A287AGH7 A0A0R4QSR6 Q2XTG2 F1SMF4 W5PL19 C0HJN6 G9KI46 A0A2I2V1R9 D2H942 G9KI47 S9YL01 A0A1S3WJA6 P61585 L5KWL7 A0A1S3WJK5 A0A212CB56 M3WK78 A0A212D8V0 C6FGL2 A0A287A9P3 A0A291L897 A0A2F0BNZ5 M3WN28                                                                                                                                                                         | 45 |

|    |         |                                 |                                                                                                                                                                                                                                                                                                                                                                            |    |
|----|---------|---------------------------------|----------------------------------------------------------------------------------------------------------------------------------------------------------------------------------------------------------------------------------------------------------------------------------------------------------------------------------------------------------------------------|----|
|    |         |                                 | A0A2I2U654 L8IUW5 A0A2I2V2A4 A5GFU4 C0HJN7 D2GXT4 D2H4T8 F1PSC2 F6RUZ6 G1NW78 S7MQD4 G1QCW2 J9P328 L5KBH6 L5LGL2 L5LH50 L5LZ49 M3VUW7 U6DT71 Q6R6M8 S9XGK6 S9XSM0                                                                                                                                                                                                          |    |
| 35 | ko00983 | Drug metabolism - other enzymes | O18730 L5KX73 A0A0H5BMM4 U6CT58 A0A1S2ZAZ4 A0A1S3W5W6 A0A1S3A4U9 A0A212CYP4 A0A1S3WW49 M1EGQ4 A0A212CGK0 A0A212CHU1 A0A212D6Z1 L5KWS6 A0A287BM41 A0A2F0B483 A0A2F0B545 W5PMT0 A4IFG0 D2H837 D2HH20 F1Q0I8 F1RRP1 R4HZ39 F6WBP0 F6S2I3 F6TPL7 F7AJ54 F7BKK5 F7BU09 F7CBR0 F7CML9 G1LCL2 G1MDR5 G1PWU5 G9K3K1 I1E3A6 H9L6R5 J9JHZ5 W5PVT7 L5KW11 L5MIH7 M3WWX5 M3YBU1 Q28254 | 45 |
| 36 | ko04217 | Necroptosis                     | D2H018 D2HIW8 Q6QRN9 Q2A135 Q9GKX7 L5LUL2 D2HUG1 U6DFP5 A0A287BBE2 U6DM87 L8HNN2 A0A171R279 A0A1S2ZFP2 A0A1S2ZIQ2 A0A212CBE3 U6CU86 A0A2F0B8W8 A0A1S3A9T1 S9WJ12 A0A2I2UFQ4 A0A287A9T4 K9K2M3 F1Q2N5 A0A2I2UNJ1 Q8HZM5 K9KAV0 F1RQQ7 A0A2F0BGN3 W5PW62 A5D9F0 Q9N0M7 Q8SQH5 F6ZBH0 F6PGW8 F6QCV1 F6ZD04 L5KBI4 L5KKR7 L5L4J6 M3WDP6 S7Q8R8 S9XM15 S9YK31 S9Z0D9            | 44 |
| 37 | ko05204 | Chemical carcinogenesis         | L5KX73 A0A0B5GZG6 A0A0H5BMM4 U6CT58 A0A1S2ZAZ4 A0A1S3A4U9 A0A1S3AL43 A0A1S3WW49 A0A212CGK0 I3LDJ0 A0A287BM41 A0A2F0B545 A0A2I2V3F9 A3RF36 A4IFG0 F6W4J7 D2H837 G9KRV3 X5L565 Q2KIF3 F1Q0I8 F6WBP0 F6S2I3 F6TPL7 F7BKK5 F7BU09 F7CBR0 F7CML9 S7NS57 G1PWU5 G1PRH7 G9K3K1 I1E3A6 H9L6R5 I3LK50 J9JHZ5 W5PVT7 K9IKD6 L5KW11 L5LC88 M3XC10 M3WWX5 S9WD75                       | 43 |
| 38 | ko04210 | Apoptosis                       | Q2A135 Q9MZS6 Q3S2Z6 U6DFP5 F1S131 G1Q569 F7DYP5 A0A1S2ZFP2 L5L1N0 M1EMG4 A0A2I2V1R9 A0A1S3AIB3 L5KWL7 W5PIJ4 A0A287A6X5 M3WK78 B7X6D1 A0A2F0B4X1 A0A2F0B5C1 A0A2F0BNX7 Q9N0M7 F1PIF2 L5KM19 L5KQK6 D2HBT8 Q3SZI2 M3W9M0 F6PGW8 F6UPN4 G1PHV0 K9IKG1 L5JWR8 L5KKR7 L5LD97 L7N0G4 L8IXT8 M3VV17 M3WDP6 M3WFX6 M3YV15 S7NI68 S7PWQ4 S9XSM0                                   | 43 |
| 39 | ko03050 | Proteasome                      | A8YXY1 A0A1S2ZGP7 J9P849 U6DJ81 D2HPT0 S7NGZ3 A1L5B1 D2HL18 B2KIF4 Q9XSB0 S7P1E5 A0A1S3A7R2 F7DG14 G9KIZ3 A0A2F0BER8 D2HM13 A0A1S3AIU8 D2HG55                                                                                                                                                                                                                              | 43 |

|    |         |                                   |                                                                                                                                                                                                                                                                                                                                               |    |
|----|---------|-----------------------------------|-----------------------------------------------------------------------------------------------------------------------------------------------------------------------------------------------------------------------------------------------------------------------------------------------------------------------------------------------|----|
|    |         |                                   | A0A2F0B658 A0A212D9M9 J9NRI0 F6TV65 D2HBR7 A7E3D5 A0A286ZLH1 A0A2D0UR87 W5P8Z3 G5E5C3 W5PVU5 M3X375 M3YAK7 W5Q2N2 W5P9U4 P62197 K9KEL6 K9IYH1 L5KFA4 M3XZZ1 M3Y3T3 U6DLB5 Q2TUQ2 S9WWA6 W5PFU1                                                                                                                                                |    |
| 40 | ko05152 | Tuberculosis                      | Q2A135 W5NPE8 Q3S2Z6 G1Q569 A0A1S2ZD99 U6D6R9 F6QPD5 A9ZTJ9 K9K296 G9KJV2 P61585 A0A1S3AFV5 U6D3G3 A0A1S3WR90 F1S0R1 L5KWL7 L5M5G5 W5P5I7 M3WK78 A0A212D522 A0A286ZIM1 M3X4B4 A0A2F0B4X1 A0A2F0BIM6 A5D9F0 L5KQK6 F6ZBH0 D2HBT8 D2HK99 I3LTB8 F7BLE3 F7E454 Q3T0E8 G1QDJ7 G1PZ23 G1PZY6 S7QHA4 L5L7S9 L5LQG7 L7N1L3 M3VX55 U6DS89             | 42 |
| 41 | ko04915 | Estrogen signaling pathway        | Q9GKX7 K9K3J6 A0A287AGH7 Q04967 F7DYP5 A0A2I2V1R9 L5JPT1 S9YL01 A0A1S3AA38 A0A1S3AI72 L5KWL7 A0A287A9T4 W5P5I7 A0A212CB56 A0A212CCD2 M3WK78 A0A212D793 B0LPM4 D2GYE5 A0A2I2UM04 L8IUW5 A5GFU4 M3Z7F7 L5KQK6 D2GYW5 D2H4T8 M3Y4R4 S4VA54 F1MWU9 K9J3P9 J9NWS3 G1LFY5 S7MQD4 Q3T0E8 G1Q8Q9 L5KX82 K9K2J3 L5KIH3 L8IEQ9 M3VUW7 M3YHN4 S7Q8R8     | 42 |
| 42 | ko00030 | Pentose phosphate pathway         | D2HXD8 I3PVT3 A0A1S2ZXM8 A0A212C7R2 A0A1S3AFR7 K9KCM0 A0A287BJI2 Q0P587 F1SEF4 K9KD81 A0A2F0AWA7 A0A2F0BG18 G9KLS1 F7DMG5 A0A2I2UQV4 M3XAY5 A6QPB5 W5P323 D2H7H6 F7BA40 E2R2C3 M3VXP7 G1LVQ8 E2RN31 F1MMK2 F1Q3S9 F6U4P2 K9KB11 F7D917 F7D9J2 K9IUE2 I3LK68 K9IM80 K9IMU0 K9IZ11 K9J2H0 K9J5C1 L5KQG7 M3W3S8 M3WB78 M3YMB2 W5QDD4             | 42 |
| 43 | ko00480 | Glutathione metabolism            | L5KX73 A0A0D3L3I9 A0A0D3L3J9 A0A0U2GQH0 U6CT58 A0A1S2ZAZ4 A0A1S2ZUS7 A0A1S3A4U9 A0A1S3WW49 A0A212C0E7 A0A212CGK0 L8IL33 A0A2F0B545 F7DMG5 A4IFG0 F1MMK2 F1Q0I8 F6WBP0 F6S2I3 F6WSA6 F7BKK5 F7BU09 F7CBR0 F7D917 L8IG93 G1PRH7 G9K3K1 G9K557 U6CTR3 I3LD43 I3Y1C6 W5PVT7 L5K352 L5K7K9 L5KW11 L5L3G1 L5M5A2 M1EEE1 S7MQ22 S7NF54 S9XTJ0 T1QFY4 | 42 |
| 44 | ko00982 | Drug metabolism - cytochrome P450 | L5KX73 A0A0B5GZG6 A0A0H5BMM4 A0A212CR61 U6CT58 A0A1S2ZAZ4 A0A1S3A4U9 A0A1S3WW49 M3XFH2 A0A212CGK0 A0A287BM41 A0A2F0B545 A3RF36 A4IFG0 D2H837 D2HKQ9 D2HKR0 U6CV02 F1Q0I8 F7CMN0 F6WBP0 F6S2I3 F7BKK5 F7BU09 F7CBR0 F7CML9 S7Q0P1 G1PWU5 G1PRH7 G9K3K1 I1E3A6 H9L6R5 I3LK50 J9JHZ5 W5PVT7                                                      | 42 |



|    |         |                                        |                                                                                                                                                                                                                                                                                                                                        |    |
|----|---------|----------------------------------------|----------------------------------------------------------------------------------------------------------------------------------------------------------------------------------------------------------------------------------------------------------------------------------------------------------------------------------------|----|
|    |         |                                        | L5KW11 L5LC88 M3WI35 M3WWX5 P58027 S9WD75 S9XRP2                                                                                                                                                                                                                                                                                       |    |
| 45 | ko04015 | Rap1 signaling pathway                 | A0A2F0AZI2 A0A0R4QSR6 Q2XTG2 L5LGV5 F7DYP5 A0A1S2ZML6 A0A1S3W7C2 D2H942 S9YL01 P61585 Q1JPH2 L5KWL7 F6Y0D9 M3YYR6 W5P5I7 A0A212CB56 Q28194 M3WK78 A0A212D7R3 U6DEN0 A0A2I2U654 L8IUW5 A0A2I2V2A4 A5GFU4 D2H4T8 D2H7V0 F1PSC2 W5NUF2 L5JWP8 S7MQD4 Q3T0E8 J9P328 L5KX82 L5KBH6 L5LZ49 L8IMA9 M3VUW7 U6DT71 S7NKD6 S9XSM0 W5Q4J3         | 41 |
| 46 | ko00330 | Arginine and proline metabolism        | A0A0B4J194 A0A0B4J195 A0A0B5H3N2 P00503 U6DE53 M3Z4A6 A0A1S3WP79 S7QES6 F1SI77 A0A212C0E7 A0A1S3AQK2 A0A1S3WFI0 M1ENI4 W5PPG3 L5K341 D2H267 D2HFN2 D2HKQ9 D2HKR0 E2R134 F6UGK7 F7CZV6 S7Q0P1 G1P0V8 U6CTR3 I3LD43 Q5EA61 K9IKY8 K9IS47 L5K7K9 L5KTT6 L5KYR8 M1ED65 M1EK49 P58027 Q3ZC84 Q9N1C7 S7NF54 S9WR76 S9WRM3 S9XRP2             | 41 |
| 47 | ko05418 | Fluid shear stress and atherosclerosis | Q9GKX7 L5KX73 U6DMG0 U6CT58 A0A1S2ZAZ4 L5LGV5 S9W9T4 M3WR50 A5J2A9 A0A2F0BML0 A0A1S3A4U9 P61585 A0A287A9T4 A0A1S3WW49 M3YYR6 W5P5I7 A0A2I2U7T2 A0A212C888 A0A212CGK0 A0A2F0B4X1 A0A2F0B545 D2GWX2 A4IFG0 K9J3P9 Q6Q2K4 F1Q0I8 F6WBP0 F6S2I3 F7BKK5 F7BU09 F7CBR0 L5KIE0 Q3T0E8 G9K3K1 W5PVT7 K9J536 L5KIH3 L5KW11 L8IEQ9 S7Q8R8 S9XSM0 | 41 |
| 48 | ko00640 | Propanoate metabolism                  | A0A287AFU8 A0A0D3L3U2 J9NU05 U6D9C3 A0A1S3AHW1 G3X6Y6 A0A1S3WN71 A0A1S3WSJ0 M1EJZ4 L5LE60 K9KAF6 A0A286ZMM3 A0A287A5W1 U6D0R5 F6ZEY5 W5P9I9 W5PL67 Q29554 D2GXN9 U6DPX0 D2HCQ9 D2HU88 G1LFA1 F1PAZ6 F1PBE6 F1PIP0 F1PUA2 F1PVW0 M3XEK3 K9ITM9 L5LX72 G1PUD8 L5K4I7 M3W762 M3WGX6 Q2TBR0 S7N9Y3 S9XGB2 S9XZR9 S9YMJ8                    | 40 |
| 49 | ko04022 | cGMP - PKG signaling pathway           | D2HIW8 Q6QRN9 A0A286ZS14 A0A1S2ZIQ2 F6QPD5 A9ZTJ9 G9KI46 A0A1S2ZUU4 A0A2I2V1R9 G9KI47 S9YL01 P61585 L5KWL7 K9K2M3 M1EFM8 W5P5I7 A0A212CB56 M3WK78 B0LPM4 C6FGL2 A0A287A9P3 D2HDN5 W5PW62 L8IUW5 Q8SQH5 B3SI03 W5Q3Y4 D2H4T8 G1L1V3 M1ET54 S7MQD4 G1PF04 Q3T0E8 G1Q555 J9P328 L5K5B0 L5KBI4 M3VUW7 U6DT71 S7P7U1                        | 40 |
| 50 | ko04922 | Glucagon signaling pathway             | A0A287AGH7 A0A0D3L3N6 J9NU05 A0A212CI59 F6QPD5 A9ZTJ9 A0A2I2V1R9 K4P0T7                                                                                                                                                                                                                                                                | 39 |

|    |         |                                              |                                                                                                                                                                                                                                                                                                                          |    |
|----|---------|----------------------------------------------|--------------------------------------------------------------------------------------------------------------------------------------------------------------------------------------------------------------------------------------------------------------------------------------------------------------------------|----|
|    |         |                                              | A0A2I2UKV8 M3Z028 A0A2I2UFQ4 A0A1S3AMF1 U6DP65 K9K3W3 W5P5I7 A0A212C888 A0A212CB56 B0LPM4 F1RQQ7 A5D9F0 A5GFU4 B3IVM1 D2H4T8 D2HU88 D2I296 J9P208 F1PHR2 F1PVW0 Q68Y62 F6ZD04 G1LHU6 S7MQD4 Q3T0E8 G1PUD8 G9KFI3 M3VUW7 M3W4B3 M3WYA9 M3XZ84                                                                             |    |
| 51 | ko05164 | Influenza A                                  | W5NPE8 U6DMG0 Q04967 G1Q569 C6F103 A0A1S2ZIQ2 A0A1S3WBU4 M1EMG4 U6D0E4 L5JPT1 A0A1S3AA38 M1EL55 L5KWL7 M3W419 L5KT76 K9J6N8 A0A212C4A3 M3WK78 A0A287A6X0 A0A212D7R3 P00761 A0A2F0B4X1 A0A2F0BGN3 A0A2F0BIM6 W5PW62 A0A2I2UM04 M3Z7F7 F6ZBH0 S4VA54 F1MWU9 Q6R757 F1Q421 G1JRQ0 U6D6A6 L5LNG8 K9K2J3 M3XDB7 M3WP64 S9XSM0 | 39 |
| 52 | ko00380 | Tryptophan metabolism                        | A0A0B5H3N2 A0A1S2ZMZ9 M3Z4A6 A0A1S3AQK2 A0A1S3WFI0 M3XFH2 M1EJZ4 K9KAF6 W5PPG3 A0A286ZXI1 U6D0R5 L5K341 K9INM5 A0A2C9F3C3 M3VXR8 M3WCZ2 Q29554 C6KGS5 D2GXN9 U6DPX0 D2HFN2 D2HKQ9 D2HKR0 F1PAZ6 F1PIPO F7CZV6 S7Q0P1 K9IKY8 L5KTT6 L5KYR8 M1ED65 M3W762 M3WGX6 O97492 P58027 S7N9Y3 S9XRP2 S9XZR9 S9YMJ8                 | 39 |
| 53 | ko00980 | Metabolism of xenobiotics by cytochrome P450 | L5KX73 A0A0B5GZG6 A0A0H5BMM4 U6CT58 A0A1S2ZAZ4 A0A1S3A4U9 A0A1S3WW49 A0A212CGK0 A0A287BM41 A0A2F0B545 A0A2F0B9R0 A0A2I2V3F9 A3RF36 A4IFG0 L8HU42 D2H837 F1Q0I8 F6WBP0 F6S2I3 F7BKK5 F7BU09 F7CBR0 F7CML9 G1PWU5 G1PRH7 G3MYW0 G9K3K1 I1E3A6 H9L6R5 I3LK50 J9JHZ5 W5PVT7 K9IKD6 L5KW11 L5LC88 L7N0B9 M3XC10 M3WWX5 S9WD75 | 39 |
| 54 | ko04723 | Retrograde endocannabinoid signaling         | A7E3V7 A0A287AGH7 A0A1C7A7L5 A0A1S2ZFV1 U6DXX1 A0A1S2ZLK6 A0A2I2V1R9 S9YL01 L5KWL7 W5PJ73 W5PP04 M1ESH1 A0A212CB56 D7NYC4 A0A212CVJ2 M3WK78 A0A212D011 Q02368 F1SHD7 A0A212D7R3 D2H766 A0A287BPW8 M3VZI9 L8IUW5 G9KCX4 D2H4T8 D2I0T0 L5LIQ8 G9KCX5 S7N665 F7BVL6 S7MQD4 U6DEP8 J9P1J9 L5KX82 L8IXE8 M3VUW7 M3X1A3 S9WWE2 | 39 |
| 55 | ko04261 | Adrenergic signaling in cardiomyocytes       | A0A286ZS14 Q6QA25 A0A287AGH7 G9KC33 G9KI46 G9KI47 S9YL01 U6DAZ5 G9KI77 A0A212CQB7 L5KA87 L5KWL7 M1EFM8 W5P5I7 A0A212CB56 M3W355 M3WK78 A0A212D7R3 B0LPM4 C6FGL2 D2HXP5 A5D9F0 L8IUW5 A5GFU4 B3SI03 P67937 D2H4T8                                                                                                         | 38 |

|    |         |                              |                                                                                                                                                                                                                                                                                                        |    |
|----|---------|------------------------------|--------------------------------------------------------------------------------------------------------------------------------------------------------------------------------------------------------------------------------------------------------------------------------------------------------|----|
|    |         |                              | D2I3N9 G1L1V3 S7MQD4 G1PF04 Q3T0E8 G1PID8 K9IX40 L5K5B0 M3VUW7 S7P7U1 S9X7J7                                                                                                                                                                                                                           |    |
| 56 | ko05322 | Systemic lupus erythematosus | L5LUL2 W5NPE8 K9IP89 G9L574 D2HZR3 A0A2F0B8W8 A0A1S3A9T1 A0A1S3AR39 D2HRD5 A0A286ZIM1 A0A287AWP8 M3X4B4 A0A2F0BIM6 T0NNF3 D2H306 G9KRA3 F1MUU9 M3XZU5 I3LTB8 F6QCV1 F7BLE3 F7BPV6 F7E454 G1L871 G1QDJ7 G1PZ23 G1PZY6 S7QHA4 G5E6I9 K9IU88 K9IVD6 L5L7S9 L8HPL3 L7N1L3 L8IS77 M3WPJ9 M3Z3Z5 S9YD43      | 38 |
| 57 | ko05225 | Hepatocellular carcinoma     | Q2A135 L5KX73 K9K3J6 L5LH84 Q9MZS6 K9K4J3 U6CT58 A0A1S2ZAZ4 L5LGV5 F7DYP5 M1EMM3 A0A1S3A4U9 L5KWL7 A0A1S3WW49 U6D317 A0A212CGK0 M1EFR9 M3WK78 A0A212D7R3 A0A2F0B0W0 A0A2F0B545 A4IFG0 W5NUF2 Q6Q2K4 M3YKX1 F1Q0I8 F6WBP0 F6S2I3 F7BKK5 F7BU09 F7CBR0 L5KIE0 G9K3K1 W5PVT7 K9J536 L5KW11 S9XSM0         | 37 |
| 58 | ko03015 | mRNA surveillance pathway    | K9KB10 U6CQZ4 A0A2F0BJF8 A0A2F0BAK9 A0A2F0B9H9 G9KI46 U6D984 U6CZX2 U6D0E4 M1EH97 G9KI47 S9X9J7 A0A2F0B8N2 U6DAZ5 G9KI77 A0A287AP48 M3WA00 K9KAI8 G9KWN2 D2I575 A0A212CQB7 L5KA87 M1EL55 A0A2I2V431 K9KEI3 D2HV73 K9J6N8 S7NBG7 C6FGL2 S7NJE0 D2HXP5 A0A2F0BNW8 A0A2I2UGS4 L5LYR9 F1S9D1 S7NJI8 S9YAT6 | 37 |
| 59 | ko05166 | HTLV-I infection             | D2HIW8 Q6QRN9 Q2A135 W5NPE8 U6DMG0 A0A287AGH7 L5LGV5 F7DYP5 A0A1S2ZIQ2 F6QPD5 K9J1H5 A9ZTJ9 Q3T054 K9K2M3 L5KT76 D7PVJ0 A0A1S6Q3A1 A0A287BA60 U6DQD0 F1SBU0 A0A2F0B0W0 A0A2F0B4X1 A0A2F0BIM6 F2VYZ3 W5PW62 A0A2I2U654 D2GWX2 A0A2I2V2A4 Q8SQH5 D2H7V0 F1PSC2 D2HGC1 G1PHV0 L5KBH6 L5KBI4 L5LZ49 S9XK10 | 37 |
| 60 | ko04512 | ECM-receptor interaction     | Q2XTG2 F1SMF4 C0HJN6 A0A1S3A1Q0 A0A212C632 A0A1S3A810 Q2KJA7 A0A1S3WM25 A0A212C4F6 Q28194 J9P8M2 A0A286ZY95 A0A287A0A6 A0A291L897 L5KNC7 U6DFK3 C0HJN7 Q3ZBS7 D2H2H6 D2HCA8 F1MER7 F1MNT4 L8I7T7 F1S663 F6QAT0 F7CGV8 G1NW78 S7NJT7 G1PQY9 G9K7T4 I3LUR7 K9IQG3 L5L7Z7 M3WHG4 S7MI38 S9WE42 W5PTE9     | 37 |

|    |         |                                             |                                                                                                                                                                                                                                                                                                         |    |
|----|---------|---------------------------------------------|---------------------------------------------------------------------------------------------------------------------------------------------------------------------------------------------------------------------------------------------------------------------------------------------------------|----|
| 61 | ko04910 | Insulin signaling pathway                   | A0A212CM85 K9K3J6 A0A2F0AZI2 A0A287AGH7 A0A0R4QSR6 F7DYP5 G9KI46 F1RV23 A0A2F0AUZ0 K4P0T7 G9KI47 A0A1S3AEI0 W5QF03 A0A2I2UFQ4 L5KWL7 W5P5I7 U6D317 A0A212C888 M3WK78 C6FGL2 Q71M99 A0A287BJI2 A0A287A1G6 F1RQQ7 A0A2F0BG18 U6DQ39 M3VXP7 F6PXA5 F6ZD04 F7DYX5 Q3T0E8 G9KFI3 L5KDF2 U6D3C6 M3W4B3 M3WB78 | 36 |
| 62 | ko05132 | Salmonella infection                        | F7BSF2 M3VYD8 L5L0U4 A0A1S2ZLK7 A0A1S3W7C2 M3YK01 W6FSW2 A0A287ALZ4 G9KJV2 A0A1S3ABM4 L5KWL7 K9KDB9 S9Y3X0 U6DVI4 M3YYR6 M3WK78 F1SGJ3 A0A2F0B4X1 A0A2F0BGN3 M3WF12 B2KIJ4 U6DSG3 G1LEN3 D2GX06 E1BDX8 W5NZK9 E2R0F2 F1PWW0 L5JWP8 S7MWU2 L5KJW2 M3XUR8 M3YZL1 S7NKD6 S9XSM0 U6DS89                     | 36 |
| 63 | ko00710 | Carbon fixation in photosynthetic organisms | A0A0B4J194 A0A0B4J195 A0A0D3L3M5 A0A0F7QHG6 P00503 A0A1S2ZXM8 A0A1S3A1J4 A0A1S3AM12 J9P7J1 K9KCM0 G9K3A6 A0A287BJI2 D0G7F6 A0A2F0AWA7 A0A2F0BG18 G9KLS1 Q3T0P6 Q0QF26 M3YZM6 M3VXP7 E2RJ62 F7D1R1 F7D9J2 G1P0V8 G9KEQ1 K9IZ11 K9J2H0 K9J5C1 L5KQG7 L5KT65 W5QFQ0 M3WB78 M3YMB2 Q0QF27 S9WDQ9            | 35 |
| 64 | ko04972 | Pancreatic secretion                        | A0A286ZS14 A0A1S2ZFC8 A0A286ZJI7 F7CKV4 U6D7V1 A0A2I2V1R9 D2H942 P61585 M1EFM8 M3YYR6 A0A212CB56 U6DM40 A0A212D7R3 P00761 A0A2F0BJ67 D2H719 A5GFU4 F7D301 B3SI03 W5Q3Y4 D2H4T8 P00591 F1PI75 F6YS25 G1L1V3 L5LNG8 S7MQD4 G1PF04 L5K5B0 L5KB43 M3VUW7 M3WK78 M3WP64 M3WTS2 S7P7U1                        | 35 |
| 65 | ko00410 | beta-Alanine metabolism                     | A0A0B5H3N2 M3Z4A6 A0A212C0E7 A0A1S3AQK2 A0A1S3WFI0 A0A1S3WN71 M1EJZ4 K9KAF6 A0A286ZMM3 W5PPG3 A0A287A5W1 A3RF36 Q29554 D2GXN9 U6DPX0 D2HCQ9 D2HFN2 G1LFA1 E2R134 F1PAZ6 F1PBE6 F1PIP0 F7CZV6 M3XEK3 I3LK50 K9IKY8 L5K4I7 L5KTT6 L5KYR8 M1ED65 M3W762 Q3ZC84 S7N9Y3 S9WRM3 S9XGB2                        | 35 |
| 66 | ko04024 | cAMP signaling pathway                      | A0A286ZS14 A0A287AGH7 K9J1H5 A0A1S2ZML6 G9KI46 D2H942 G9KI47 S9YL01 P61585 L5KWL7 M1EFM8 M3YYR6 W5P5I7 M3WK78 B0LPM4 C6FGL2 A0A2F0B4X1 A5D9F0 A0A2I2UME7 L8IUW5 A5GFU4 B3SI03 D2H7V0 G1L1V3 G1LTX1 G1PF04 Q3T0E8 G1Q555 K9IM30 L5K5B0 L5MDE3 M1ECB8 M3WMB8 S7P7U1 T0MFV8                                | 35 |
| 67 | ko04020 | Calcium signaling pathway                   | D2HIW8 Q6QRN9 A0A287AGH7 A0A1S2ZIQ2 F6QPD5 A9ZTJ9 A0A1S2ZUU4 A0A2I2V1R9 K9K2M3 A0A212CNU7 M1EFM8 W5P5I7 A0A212CB56 G9K6E9 A0A212D7R3 A0A286ZIM1                                                                                                                                                         | 35 |

|    |         |                                     |                                                                                                                                                                                                                                                                                              |    |
|----|---------|-------------------------------------|----------------------------------------------------------------------------------------------------------------------------------------------------------------------------------------------------------------------------------------------------------------------------------------------|----|
|    |         |                                     | A0A287A9P3 M3X4B4 W5PW62 A5D9F0 A5GFU4 Q8SQH5 W5Q3Y4 D2H4T8 W5NUF2 G1L1V3 M1ET54 S7MQD4 Q3T0E8 G1QDJ7 G1PZ23 G1PZY6 S7QHA4 L5KBI4 M3VUW7                                                                                                                                                     |    |
| 68 | ko04728 | Dopaminergic synapse                | A7E3V7 A0A287AGH7 F6QPD5 G9KI46 A0A2I2V1R9 G9KI47 S9YL01 U6DAZ5 G9KI77 A0A212CQB7 L5KA87 A0A1S3AQT8 W5PP04 W5P5I7 M1ESH1 A0A212CB56 A0A212D7R3 B0LPM4 C6FGL2 D2HXP5 A5D9F0 L8IUW5 A5GFU4 D2H4T8 D2HKQ9 D2HKR0 G9K7B3 F1RWC5 S7Q0P1 S7MQD4 Q3T0E8 L5KX82 M3VUW7 P58027 S9XRP2                 | 35 |
| 69 | ko04610 | Complement and coagulation cascades | A0A1S3A0H0 A0A1S3WJ22 A0A1S3WJA6 A0A1S3A810 A0A1S3WJK5 A0A212D8V0 A0A287AWP8 A0A291L897 A0A2F0BNZ5 A0A2I2U1U0 M3WN28 T0NNF3 Q3ZBS7 D2GXT4 U6DVY6 D2H306 E2RS75 F6RUZ6 F1Q421 I3LTB8 F6R942 F6RMD0 F7BLE3 F7E454 G1PHH1 G1PHQ7 L5L7S9 L5LGL2 L5LH50 L5MK20 L7N1L3 M3WPJ9 Q6R6M8 Q7M364 S9YD43 | 35 |
| 70 | ko04621 | NOD-like receptor signaling pathway | Q9GKX7 S9W9T4 A0A1S2ZIQ2 K9K296 A0A1S3WBU4 A5J2A9 A0A2I2V1R9 P61585 L5KWL7 A0A287A9T4 K9K2M3 A0A212CNU7 M1EK55 A0A212CB56 K9KAV0 M3WK78 A0A287B8G6 B7X6D1 A0A2F0B4X1 A0A2F0BGN3 W5PW62 G1LPV1 D2H4T8 F6ZBH0 J9P6U1 Q6R757 U6D6A6 S7MQD4 G9KCG8 M3XDB7 L5KBI4 L5KYI5 M3VUW7 M3WEK9 S7Q8R8     | 35 |
| 71 | ko00500 | Starch and sucrose metabolism       | A0A172ZB06 U6D7J0 A0A1S2ZSM7 A0A2I2UFQ4 M3WNV6 F1SK65 A0A287A042 A0A287A1G6 F1RQQ7 M3WU26 A6QPB5 S7PEU0 W5P323 D2H7H6 D2HHN0 M1EKS2 U6DT09 E1BGH5 E2R2C3 F6ZR94 F6PXA5 F6Z1M4 K9KB11 F6ZD04 F7DGG1 G1NZF0 K9IUE2 G1PWG9 G9L1C1 K9IM80 L5KDF2 S9WDR6 M3W3S8 M3YE08 W5NU90                     | 35 |
| 72 | ko04921 | Oxytocin signaling pathway          | A0A287AGH7 F7DYP5 F6QPD5 A9ZTJ9 G9KI46 S9XMM3 A0A287A1E0 A0A2I2V1R9 K4P0T7 G9KI47 S9YL01 P60662 P61585 L5KWL7 W5P5I7 A0A212C888 A0A212CB56 M3WK78 A0A212D7R3 C6FGL2 A0A287A9P3 A0A2F0B3B4 A5D9F0 L8IUW5 A5GFU4 D2H4T8 S7MQD4 Q3T0E8 G1Q555 L5KX82 S7QGB7 M3VUW7 S7MI30 S9XSM0                | 34 |
| 73 | ko00051 | Fructose and mannose metabolism     | I3PVT3 L5LFR5 G9KG42 A0A1S3AM12 W5Q563 A0A212CXD2 K9KCM0 A0A287AE46 A0A287BJI2 A0A287A1G6 F6W683 D0G7F6 A0A2F0BG18 E2R1D1 M3VXP7 F1PNB8 F1Q3S9 F6PXA5 F6U4P2 M1ESY4 G1PBK3 I3LK68 K9IMU0 K9J061 K9J2H0 K9J5C1 L5KDF2 L5KQG7 L5KQY1 M3WB78 M3YMB2 W5P5K7 S9WLV8 W5QDD4                        | 34 |

|    |         |                                     |                                                                                                                                                                                                                                                                                       |    |
|----|---------|-------------------------------------|---------------------------------------------------------------------------------------------------------------------------------------------------------------------------------------------------------------------------------------------------------------------------------------|----|
| 74 | ko04612 | Antigen processing and presentation | Q9GKX7 W5NPE8 Q04967 L5JPT1 A0A1S3AA38 A0A1S3ADV1 D2HG55 A0A2F0B658 A0A287A9T4 A0A1S3WH34 A0A1S6Q3A1 A0A212CT24 A0A212D522 B7X6D1 A0A2F0BIM6 F2VYZ3 A0A2I2UM04 W5PMM7 M3Z7F7 B2KIQ0 B3RF11 D2HBT8 D2HGC1 S4VA54 F1MWU9 H8ZYZ4 M3YFX2 S7PUU6 G1PPY6 K9K2J3 M3W668 M3Y3T3 S7Q8R8 S9XK10 | 34 |
| 75 | ko00680 | Methane metabolism                  | A0A0B5GZG6 I3PVT3 U6D9C3 M3Z028 I3RM61 A0A1S3WSJ0 A0A212CZ82 K9KCM0 A0A212DF69 A0A287AE46 A0A287BJI2 A0A2F0BG18 M3XAF3 M3W1X4 W5P9I9 G9KGC8 M3VXP7 E2RN31 F1PUA2 F1Q3S9 F6U4P2 G1M424 I3LK68 K9IMU0 K9J2H0 K9J5C1 L5KQG7 L5LC88 M3WB78 M3YMB2 S9W8P0 S9WD75 T0NQQ8 W5QDD4             | 34 |
| 76 | ko04270 | Vascular smooth muscle contraction  | P63258 A0A287AAR4 A0A287AGH7 A0A287AVS8 M1EB39 G9KI46 A0A1S2ZUU4 A0A2I2V1R9 G9KI47 P60662 P61585 L5KWL7 A0A1S3WFX8 W5P5I7 U6D317 A0A212CB56 U6DM40 M3WK78 A0A212D7R3 C6FGL2 A0A287A9P3 A0A2F0B3B4 A5GFU4 A7UDB4 D2H4T8 M1ET54 S7MQD4 Q3T0E8 G1Q555 S7QGB7 M1EGW5 M3VUW7 O46546 P84336 | 34 |
| 77 | ko05034 | Alcoholism                          | L5LUL2 K9K3J6 A7E3V7 F7DYP5 G9KI46 A0A2F0B8W8 G9KI47 S9YL01 A0A1S3A9T1 U6E0K5 L5KWL7 W5PP04 W5P5I7 M1ESH1 U6D317 M3XP31 M3WK78 B0LPM4 C6FGL2 L8IUW5 A5GFU4 D2HKQ9 D2HKR0 F1MUU9 F6QCV1 S7Q0P1 Q3T0E8 G5E6I9 L5KX82 L8IS77 M3Z3Z5 P58027 S9XRP2                                        | 33 |
| 78 | ko05134 | Legionellosis                       | A0A287A4A5 Q3S2Z6 Q04967 G1Q569 B3EX57 A0A287B013 A0A1S2ZY37 L5JPT1 A0A1S3AA38 A0A1S3AFV5 C5IJ85 W5PIJ4 D2GVJ6 L8IC82 U6DEL0 A0A2F0B4X1 A0A2F0BGN3 A0A2I2UM04 M3Z7F7 E2RER1 S4VA54 K9J0X4 F1MWU9 I3LTB8 F7BLE3 F7E454 L5LWP7 K9K2J3 L5KB26 L5L7S9 L5LQG7 L5M3T4 L7N1L3                | 33 |
| 79 | ko00052 | Galactose metabolism                | A0A172ZB06 I3PVT3 M3WNV6 A0A287A042 A0A287A1G6 M3WU26 A6QPB5 S7PEU0 D2H7H6 D2HHN0 S7MR26 M3XST3 E1BGH5 F1PNB8 F1Q3S9 F6PXA5 F6U4P2 F6Z1M4 K9KB11 F7DGG1 M1ESZ8 G1NZF0 K9IUE2 G1PWG9 I3LK68 K9IMU0 L5KDF2 L5KEY5 L5KQY1 L5KU76 M3YE08 W5NU90 W5QDD4                                    | 33 |
| 80 | ko04218 | Cellular senescence                 | D2HIW8 Q6QRN9 F7DYP5 A0A1S2ZFP2 A0A1S2ZIQ2 S9X2K9 F6QPD5 K9J1H5 A9ZTJ9 M1EMM3 A0A2F0AZR5 G9KI46 A0A2I2V1R9 G9KI47 L5KWL7 K9K2M3 A0A212CNU7 W5P5I7 A0A1S6Q3A1 M3WK78 C6FGL2 A0A2F0B4X1 A0A2F0BD37 F2VYZ3 W5PW62                                                                        | 33 |

|    |         |                                  |                                                                                                                                                                                                                                                                        |    |
|----|---------|----------------------------------|------------------------------------------------------------------------------------------------------------------------------------------------------------------------------------------------------------------------------------------------------------------------|----|
|    |         |                                  | Q9N0M7 Q8SQH5 D2H7V0 F6PGW8 Q3T0E8 G1PHV0 L5KBI4 M3WDP6                                                                                                                                                                                                                |    |
| 81 | ko04152 | AMPK signaling pathway           | F6RPZ5 I3PVT3 A0A287A1E0 A0A1S3A1Q0 K4P0T7 U6DAZ5 G9KG42 G9KI77 A0A212CQB7 L5KA87 A0A2F0B6M3 U6DJ93 A0A212C888 B0LPM4 A0A287BJI2 D2HXP5 A0A2F0BG18 U6DK05 W5QAY5 D2I296 M3VXP7 F1Q3S9 Q68Y62 F6U4P2 G9KFI3 I3LK68 K9IMU0 U6D3C6 M3W4B3 M3WB78 M3XZ84 S7MI30 W5QDD4     | 33 |
| 82 | ko04666 | Fc gamma R-mediated phagocytosis | A0A2F0AZI2 W5Q9P7 M3VYD8 A0A1S3W7C2 M3YK01 A0A287ALZ4 A0A1S3ABM4 U6DUF8 A0A1S3AH28 U6DQ93 L5KWL7 S9Y3X0 W5QDG3 U6DVI4 M3YYR6 K9K4N2 M3WK78 A0A212D7R3 A0A286ZIM1 M3X4B4 A0A2F0BAE6 G3X6T2 U6DSG3 T0MIA6 W5NUF2 G1QDJ7 G1PZ23 G1PZY6 S7QHA4 J9P328 L5KJW2 M3W3G0 U6DT71 | 33 |
| 83 | ko04974 | Protein digestion and absorption | A0A212C1I6 L5JZX8 A0A286ZS14 E2DHI6 A0A1S2ZY73 C0HJN6 M1EP37 A0A212C4F6 F6XHX6 A0A287A0A6 P00761 B3SI03 C0HJN7 L8IHS5 F5C3N2 F1PI75 F6QAT0 F6QD89 F7CGV8 L5LNG8 G1NW78 G1PF04 G9KPP9 I3LUR7 L5JN10 L5K5B0 L5KB43 M3WHG4 M3WKB7 M3WLC0 M3WP64 S7P7U1 W5PTE9             | 33 |
| 84 | ko05206 | MicroRNAs in cancer              | K9K3J6 Q9MZS6 A0A2F0AZI2 Q3S2Z6 A0A2C9F3D9 A0A0E3MY68 A0A287BBE2 F7DYP5 M1EMM3 P61585 A0A1S3WP72 A4FV69 A0A212CKB0 M3W355 Q28194 A0A212D7R3 G1LB91 D6MZW9 B5SRK4 D2H2H6 D2I3N9 L8I7T7 W5NUF2 Q6Q2K4 L5KIE0 G1PHV0 G1PNM3 G1PQY9 L5LRW2 K9ILK2 L5JS44 M3Z3M9            | 32 |
| 85 | ko04142 | Lysosome                         | M1EBW1 U6D6R9 Q1JQ98 U6D1P2 A0A1S2ZT41 U6DEQ4 S7NI61 A0A212CYP4 A0A287A8E1 F1S0R1 K9KFQ9 U6DEW7 A0A212D105 M3WY66 A6QM01 B7X6D1 A0A2F0BEU1 F1PIF2 L5KQK6 M1EKI6 D2HBT8 D2HIT7 F6QVW1 M3XST3 M3W9M0 K9KAA1 G9K475 I1WYE1 K9IKG1 L5LCL6 L5LD97 S9XCV8                    | 32 |
| 86 | ko04260 | Cardiac muscle contraction       | B5LMI3 A0A286ZS14 Q6QA25 G3LSY2 G9KC33 Q95283 G9KWP4 D7NY87 Q9N114 M3W355 Q9TR28 F7BXM5 L5KJ87 B3SI03 P67937 D2HU05 D2I3N9 D7NY71 D7NY90 U6CRD9 L5LYM4 F6QA35 F6SD71 G1PF04 G1PID8 K9IKF8 K9IX40 L5K5B0 M1F5E9 M3W8B7 S7P7U1 S9X7J7                                    | 32 |
| 87 | ko00310 | Lysine degradation               | A0A0B5H3N2 A0A0D3L3G0 M3Z4A6 M1EF26 A0A1S3AQK2 A0A1S3WFI0 A0A1S3WQ02                                                                                                                                                                                                   | 32 |

|    |         |                                                   |                                                                                                                                                                                                                                                                     |    |
|----|---------|---------------------------------------------------|---------------------------------------------------------------------------------------------------------------------------------------------------------------------------------------------------------------------------------------------------------------------|----|
|    |         |                                                   | M1EJZ4 K9KAF6 W5PPG3 A0A286ZXI1 U6D0R5 K9INM5 A0A2C9F3C3 M3WCZ2 Q29554 D2GXN9 U6DPX0 D2HFN2 G1MJ14 F1PAZ6 F1PIP0 F7CZV6 K9IKY8 L5KTT6 L5KYR8 M1ED65 M3W762 M3WGX6 S7N9Y3 S9XZR9 S9YMJ8                                                                              |    |
| 88 | ko00630 | Glyoxylate and dicarboxylate metabolism           | A0A0D3L3C7 A0A287AFU8 A0A0D3L3F4 A0A0D3L3M5 A0A0D3L3W7 A0A1S2ZMZ9 A0A1S2ZT56 Q8HZM5 L5LE60 A0A212DF69 U6D0R5 F6QTI9 A0A287BHL2 M3VXR8 F6ZEY5 C6KGS5 U6DGJ5 Q0QF26 E2RN31 L5KT65 L5KUZ8 W5QFQ0 M3WGX6 U6CVN2 O97492 Q0QEK5 Q0QF27 Q2TBR0 S9WR76 S9XZR9 S9YMJ8 W5QAA9 | 32 |
| 89 | ko04918 | Thyroid hormone synthesis                         | A0A286ZS14 A0A287AGH7 P02769 A0A1S2ZRW6 A0A2I2V1R9 A0A212CB56 A0A212CKY6 A0A212D7R3 B0LPM4 F1SAD9 P49064 A5GFU4 B3SI03 D2H4T8 D2HGC1 D2I061 K9J3P9 F6WGL8 F6YG82 L8IG93 S7MQD4 G1PF04 L5K0I9 L5K5B0 L5KIH3 L8IEQ9 M3VUW7 P14639 P50390 S7MQ22 S7P7U1 X2GM95         | 32 |
| 90 | ko05100 | Bacterial invasion of epithelial cells            | A0A2F0AZI2 Q2XTG2 F1RYS5 B3RF63 L5LGV5 F6YQC6 M3VYD8 A0A1S3W7C2 M3YK01 A0A1S2ZT41 W6FSW2 U6DXA9 A0A287ALZ4 A0A1S3ABM4 P61585 F6Y0D9 S9Y3X0 U6DVI4 M3YYR6 J9P8M2 A0A286ZY95 M1ER65 F7D2Z3 A0A2F0B1P3 L5KLY8 U6DSG3 M1EKI6 S9X7B9 F6ZSZ5 S7NJT7 L5KJW2 S9XSM0         | 32 |
| 91 | ko00970 | Aminoacyl-tRNA biosynthesis                       | G9KME6 A0A1S2ZV56 A0A2F0B574 B0LRP3 A0A1S3AF38 S9XNC5 A0A1S3AMB0 G9K3U0 A0A212D335 F1S9K5 K9K2D7 A0A287AKI9 M3WA40 S7MN09 U6DD42 M1EP66 M1EL37 D2I7G7 W5P929 K9IVV5 F6PNS7 F6Y0H4 G1M4C5 G1PJ70 G9KX46 K9IKW3 L5KVH4 M3VYT4 M3XYH1 S9WZL5 S9XPG2                    | 31 |
| 92 | ko04670 | Leukocyte transendothelial migration              | K9IP89 Q2XTG2 L5LGV5 F6YQC6 M3WNL4 W5PL19 A0A1S2ZML6 A0A1S3W7C2 D2H942 A0A212D8Q1 S9YL01 P61585 M3YYR6 A0A212CET4 A0A212D7R3 W5PMF3 U6DEN0 F7D2Z3 A0A2F0B1P3 L8IUW5 W5NUF2 L8II38 F6ZSZ5 G1Q555 J9P328 K9ILK2 K9IU88 K9IVD6 L8HPL3 U6DT71 S9XSM0                    | 31 |
| 93 | ko05167 | Kaposi's sarcoma-associated herpesvirus infection | Q2A135 Q9MZS6 Q3S2Z6 U6DMG0 A7E3V7 G1Q569 A0A287BBE2 L5LGV5 F7DYP5 F6QPD5 A9ZTJ9 M1EMM3 A0A2I2V1R9 L5KWL7 M3YYR6 W5PP04 W5P5I7 M1ESH1 A0A1S6Q3A1 M3WK78 A0A2F0B4X1 F2VYZ3 F6ZBH0 W5NUF2 I3LTB8 F7BLE3 F7E454 Q3T0E8 M3XDB7 L5L7S9 L7N1L3                            | 31 |



|     |         |                           |                                                                                                                                                                                                                                                              |    |
|-----|---------|---------------------------|--------------------------------------------------------------------------------------------------------------------------------------------------------------------------------------------------------------------------------------------------------------|----|
| 94  | ko05162 | Measles                   | Q04967 A0A287BBE2 C6F103 G1NSY2 K9K296 M1EMM3 D2HSA3 M1EMG4 S4TZR5 L5JPT1 A0A1S3AA38 N0E6I4 A0A286ZIM1 M3X4B4 A0A2F0B4X1 A0A2I2UM04 M3Z7F7 F6ZBH0 S4VA54 F1MWU9 Q6R757 L8II38 G1JRQ0 U6D6A6 G1QDJ7 G1PZ23 G1PZY6 S7QHA4 K9K2J3 M3XDB7 L5KA68                 | 31 |
| 95  | ko04926 | Relaxin signaling pathway | K9K3J6 P63258 A0A287AAR4 U6DMG0 A7E3V7 A0A287AGH7 F7DYP5 A0A287AVS8 M1EB39 C0HJN6 S9YL01 L5KWL7 W5PP04 M1ESH1 A0A212C4F6 A0A212CB56 M3WK78 A0A212D7R3 B0LPM4 A0A2F0B4X1 L8IUW5 A5GFU4 A7UDB4 C0HJN7 D2H4T8 G1NW78 S7MQD4 L5KX82 M3VUW7 O46546 P84336         | 31 |
| 96  | ko04216 | Ferroptosis               | D2HUG1 A0A2F0BFT8 A0A0U2GQH0 A0A1S2ZUS7 K9K2M3 A0A287AQX2 P09571 L8I5R0 G1MAJ7 D2HIZ8 F1Q0U3 Q6Q2K4 F6PQ46 F6V1W9 F6WSA6 P27425 G1NW60 G1P4I2 L5KIE0 G9KPP9 I3VKE6 I3Y1C6 K9IMX4 K9IXE5 L5JZV3 L5KBI4 L5L4J6 M3WLC0 S9WS78 S9XM15 S9Z0D9                     | 31 |
| 97  | ko04371 | Apelin signaling pathway  | P63258 A0A287AAR4 A7E3V7 A0A287AGH7 G9KC33 F7DYP5 A0A287AVS8 K9J1H5 M1EB39 A0A2I2V1R9 K4P0T7 S9YL01 W5QF03 L5KWL7 F6Y0D9 W5PP04 W5P5I7 M1ESH1 A0A212C888 A0A212CB56 M3WK78 A0A287A9P3 L8IUW5 A7UDB4 D2H4T8 D2H7V0 S7MQD4 Q3T0E8 M3VUW7 O46546 P84336         | 31 |
| 98  | ko04066 | HIF-1 signaling pathway   | A0A212CM85 A0A0D3L3N6 A0A0D3L3Q9 A0A287BBE2 A0A1S3A1J4 W5QF03 L5KWL7 I3RM61 L5LNB4 K9K3W3 A0A1S3WVF1 M3WK78 A0A212D7R3 A0A287A1G6 P09571 A0A2F0B4X1 A5D9F0 M3W1X4 M3YZM6 J9P208 W5NUF2 Q6Q2K4 F6PXA5 F6V1W9 P27425 G1P4I2 L5KIE0 G9KEQ1 L5KDF2 S9W8P0 T0NQQ8 | 31 |
| 99  | ko00830 | Retinol metabolism        | A0A0B5GZG6 A0A0H5BMM4 A0A2F0BE96 A0A1S3AKG6 A0A1S3AL43 M3XFH2 A0A212C5A0 G9KKN7 A0A287BLC6 I3LDJ0 A0A287BM41 F6W4J7 D2H837 X5L565 Q2KIF3 G1Q406 F6UJ79 F7CKH3 F7CML9 G1PWU5 I1E3A6 H9L6R5 I3LRS5 J9JHZ5 K9IKV2 L5LC88 L8I5I5 M1EDX0 M3WXX5 S9WC43 S9WD75     | 31 |
| 100 | ko03018 | RNA degradation           | A0A212DE46 A0A212CED5 I3PVT3 A0A2F0B644 M3Z0N6 A0A1S2ZD99 K9KA18 A0A287AZJ4 U6E164 S7QAR2 J9P5Z8 A0A287AP48 A0A1S3AFV5 S9X714 I3RM61 A0A2F0AZD6 U6CQD8 M3W1X4 K9KEM7 Q8MJJ7 D2HK99 F1Q3S9 F6U4P2 I3LK68                                                      | 31 |

|     |         |                                    |                                                                                                                                                                                                                                                   |    |
|-----|---------|------------------------------------|---------------------------------------------------------------------------------------------------------------------------------------------------------------------------------------------------------------------------------------------------|----|
|     |         |                                    | K9IMU0 L5JYN3 L5LQG7 M3VX55 S9W8P0 T0NQQ8 W5QDD4                                                                                                                                                                                                  |    |
| 101 | ko05145 | Toxoplasmosis                      | W5NPE8 Q3S2Z6 Q04967 G1Q569 A0A287BBE2 Q2XTG2 K9K296 A0A212C632 L5JPT1 S9YL01 A0A1S3AA38 Q2KJA7 L5KWL7 A0A1S3WM25 M3WK78 A0A2F0B4X1 A0A2F0BIM6 A0A2I2UM04 L8IUW5 U6DFK3 M3Z7F7 F6ZBH0 S4VA54 F1MNT4 F1MWU9 F1S663 G9K7T4 L5KX82 K9K2J3 S9WE42     | 30 |
| 102 | ko04014 | Ras signaling pathway              | K9K3J6 A7E3V7 A0A287AGH7 G1NYU0 F7DYP5 K9J1H5 A0A1S2ZML6 A0A1S3W7C2 D2H942 A0A212D8Q1 P61585 A0A1S3WR90 Q1JPH2 U6DQ93 L5KWL7 M3YYR6 W5PP04 W5P5I7 M1ESH1 U6DM40 M3WK78 A0A212D4N0 A0A212D7R3 U6D7Z2 A0A2F0B4X1 D2H7V0 W5NUF2 Q3T0E8 M3XDB7 L8IMA9 | 30 |
| 103 | ko04114 | Oocyte meiosis                     | D2GY30 F1PKW7 A0A287AGH7 M3X2J2 F6QPD5 P62262 A9ZTJ9 G9KI46 A0A2I2V1R9 G9KI47 U6DAZ5 L5JXN5 G9KI77 L5K1J6 A0A212CQB7 L5KWL7 A0A2F0BMA1 W5P5I7 A0A212CNA6 M3WK78 C6FGL2 D2HXP5 A5D9F0 A0A2I2UZP4 J9NRH5 D2HLL8 P68509 Q3T0E8 G9KYF2                | 29 |
| 104 | ko05143 | African trypanosomiasis            | P04237 P14392 S9WA55 A0A212C632 A0A212CB56 A0A212D7R3 A0A220IG95 A0A286ZIM1 M3X4B4 P24660 G3MZ21 D2H4T8 D2HC77 D2HMF7 F1RII5 S7MQD4 G1QDJ7 G1PZ23 G1PZY6 S7QHA4 M3VUW7 P0DM92 Q9XSN3 P01962 S9X3Z7 P02058 P0DMA9 Q28743 Q95MA1                    | 29 |
| 105 | ko01524 | Platinum drug resistance           | Q2A135 L5KX73 Q9MZS6 Q3S2Z6 G1Q569 U6CT58 A0A1S2ZAZ4 G9KUN4 A0A1S3A4U9 L5KWL7 A0A1S3WW49 A0A212CGK0 M3WK78 A0A2F0B545 A4IFG0 D6MZW9 B5SRK4 F1Q0I8 F6WBP0 F6S2I3 F6VW89 F7BKK5 F7BU09 F7CBR0 G1PHV0 G9K3K1 W5PVT7 L5KW11 M3YZW9                    | 29 |
| 106 | ko00270 | Cysteine and methionine metabolism | A0A0B4J194 A0A0B4J195 A0A0D3L3M5 A0A0U2GQH0 J9NU05 P00503 K9KBH7 M1ED90 K9KEY6 A0A287ABT4 A0A212C0E7 A0A212CDD0 A0A212CHA3 A0A286ZTN2 F6ULU1 D2HU88 Q0QF26 M3Z294 E2RDY8 F1PVW0 F6WH85 F6WSA6 G1P0V8 G1PUD8 K9IIR5 L5KT65 W5QFQ0 Q0QF27 S9XY13    | 29 |
| 107 | ko04540 | Gap junction                       | K9K3J6 A0A287AGH7 F7DYP5 L5L1N0 L5L0U4 G1MD73 A0A1S2ZUU4 A0A2I2V1R9                                                                                                                                                                               | 28 |

|     |         |                                         |                                                                                                                                                                                                                                                 |    |
|-----|---------|-----------------------------------------|-------------------------------------------------------------------------------------------------------------------------------------------------------------------------------------------------------------------------------------------------|----|
|     |         |                                         | S9YL01 L5KWL7 G9KVY5 A0A212CB56 M3WK78 A0A212D7R3 A0A2F0BNX7 F6XCF2 L8IUW5 A5GFU4 D2H4T8 M1ET54 S7MQD4 L5KJ27 L7N0G4 L8IXT8 M3VUW7 M3VV17 M3WFX6 S7PWQ4                                                                                         |    |
| 108 | ko04150 | mTOR signaling pathway                  | A0A212CM85 K9K3J6 A0A212C394 K9IRF1 F7DYP5 A0A2F0B6Q1 A0A212CV04 A0A2F0B503 U6CW76 Q66X52 P61585 A0A2F0AZL6 W5QF03 F6Y4J0 L5KWL7 A0A212CD21 A0A2F0BMA1 A0A212C888 M1EFS0 M3WK78 G1M9M5 A0A212D7R3 A0A2F0B0W0 U6DK05 G9KMS8 G9KPP9 M3WLC0 S7PKS0 | 28 |
| 109 | ko00860 | Porphyrin and chlorophyll metabolism    | A0A0H5BMM4 A0A212CYP4 A0A2F0B968 A0A1S3WU17 F1S9K5 A0A287BM41 U6DRU6 L8I5R0 D2H837 Q6Q2K4 F6PNS7 F6PQ46 F6ZR32 F7CML9 F7D2D9 G1NW60 L5KIE0 G1PWU5 I1E3A6 H9L6R5 I3VKE6 J9JHZ5 M3VVW0 M3WWX5 M3XYH1 P52556 S9WS78 W5Q8F8                         | 28 |
| 110 | ko04726 | Serotonergic synapse                    | M1EDY4 Q3S2Z6 A7E3V7 A0A287AGH7 F7DYP5 A0A2I2V1R9 S9YL01 L5KWL7 W5PP04 M1ESH1 U6D317 A0A212CB56 M3WK78 A0A212D7R3 L8IUW5 A5GFU4 F6W4J7 D2H4T8 D2HKQ9 D2HKR0 L8HWC3 F6YT02 S7Q0P1 S7MQD4 L5KX82 M3VUW7 P58027 S9XRP2                             | 28 |
| 111 | ko00720 | Carbon fixation pathways in prokaryotes | A0A0D3L3C7 A0A287AFU8 A0A0D3L3F4 A0A0D3L3I9 A0A0D3L3J9 A0A0D3L3W7 U6D9C3 A0A1S3WSJ0 L5LE60 L8IL33 U6D0R5 W5P9I9 C5IWW1 D2H9H6 D2HIS1 F1PUA2 G9K557 L5K352 L5L3G1 L5M5A2 M3WGX6 U6DVI2 U6CVN2 Q29RK2 S9XZR9 S9YMJ8 T1QFY4 W5QAA9                 | 28 |
| 112 | ko04120 | Ubiquitin mediated proteolysis          | A0A212CLX0 A0A1S3A715 A0A212DGL1 M3X2J2 K9K296 F7DFC6 G9KW56 A0A1S3WCM2 A0A1S3WGM7 G9KWA3 S9W5Z5 W5QGT1 L5K1J6 G9KW92 L5LNB4 G9KW55 K9KBQ8 K9KE00 A0A1S3WVF1 K9K1Z6 A0A2F0BKC4 D2HVP3 A0A2F0BAR8 D6MZW9 B5SRK4 M3VWK3 L5L0T6                    | 27 |
| 113 | ko05161 | Hepatitis B                             | Q2A135 D2GY30 K9K3J6 Q3S2Z6 F1PKW7 U6DMG0 G1Q569 A0A0K0QRG9 A0A287BBE2 U6DM87 F7DYP5 M1EMM3 Q66X52 L5KWL7 D7PVJ0 M3WK78 A0A212D7R3 A0A2F0BKC4 B0LPM4 A0A2F0B4X1 D2HLL8 F6ZBH0 D2HCA8 F1MER7 M3XDB7 L5KBI4 S7MI38                                | 27 |
| 114 | ko04975 | Fat digestion and absorption            | A0A0B4J194 W5Q4A5 A0A0N9DRK7 A0A1S2ZBH9 A0A1S2ZFC8 M3W2J6 A0A1S2ZQP1                                                                                                                                                                            | 27 |

|     |         |                                             |                                                                                                                                                                                                                          |    |
|-----|---------|---------------------------------------------|--------------------------------------------------------------------------------------------------------------------------------------------------------------------------------------------------------------------------|----|
|     |         |                                             | A0A1S3A1Q0 U6DM40 A0A2F0BCM3 A0A2F0BDW1 D2H719 D2HC77 P00591 E2QXN6 F1P8Z5 U6CRR3 Q865F1 F6TIW7 G1P0V8 G1PHS4 M3W955 P0DM92 M3WWJ5 M3XYH5 P0DMA9 W5PZC8                                                                  |    |
| 115 | ko04520 | Adherens junction                           | K9IP89 L5LGV5 F6YQC6 U6DPS0 G1NSY2 L5L0U4 A0A1S2ZML6 A0A1S3W7C2 D2HSA3 A0A1S3ABM4 P61585 L5KWL7 N0E6I4 F6Y0D9 A0A1S3AQS0 M3YYR6 M3WK78 Q71M99 U6DEN0 F6YRC5 F6ZSZ5 F7DYX5 K9IU88 K9IVD6 L8HPL3 M3W1X6 S9XSM0             | 27 |
| 116 | ko05130 | Pathogenic Escherichia coli infection       | Q2XTG2 L5LGV5 L5L1N0 M3VYD8 G1MD73 A0A1S3W7C2 M3YK01 A0A287ALZ4 P61585 F6Y0D9 S9Y3X0 U6DVI4 G9KVY5 A0A2I2U7T2 A0A212D7R3 A0A2F0BNX7 F6XCF2 U6DSG3 F6X3K0 K9ILK2 L5KJW2 L7N0G4 L8IXT8 M3VV17 M3WFX6 S7PWQ4 S9XSM0         | 27 |
| 117 | ko00250 | Alanine, aspartate and glutamate metabolism | A0A0B4J194 A0A0B4J195 L8HNN2 P00503 J9P7J1 F1Q2N5 A0A1S3WN71 A0A1S3WP72 Q8HZM5 A0A1W2JPN4 A1L588 A0A286ZMM3 G9K3A6 F1MZY2 F6U841 A4Z6H0 L5M996 U6D6A9 D2H267 D2HCQ9 J9P266 E2RJ62 L8IWU2 F1SKY2 F6VPL4 G1P0V8 M3W2V6     | 27 |
| 118 | ko05150 | Staphylococcus aureus infection             | W5NPE8 A0A1S3A0H0 A0A1S3WJA6 A0A212D8V0 A0A286ZIM1 A0A287AWP8 M3X4B4 A0A2F0BIM6 A0A2F0BNZ5 M3WN28 D2H306 E2RS75 F1Q421 I3LTB8 F6RMD0 F7BLE3 F7E454 G1QDJ7 G1PZ23 G1PZY6 S7QHA4 L5L7S9 L5LH50 L7N1L3 M3WPJ9 Q6R6M8 S9YD43 | 27 |
| 119 | ko05414 | Dilated cardiomyopathy (DCM)                | Q6QA25 A0A287AGH7 G9KC33 Q2XTG2 F1SMF4 A0A1S3AIB3 M3W355 A0A286ZIM1 M3YYW2 M3X4B4 L5KNC7 U6DFK3 A5GFU4 P67937 D2I3N9 Q3SZI2 G1PID8 G1QDJ7 G1PZ23 G1PZY6 S7QHA4 K9IQG3 K9IX40 L5JWR8 S9X7J7 S9XSM0                        | 26 |
| 120 | ko04931 | Insulin resistance                          | A0A287BBE2 A0A212CI59 G9KI46 U6D6M3 A0A1S3A1Q0 K4P0T7 A0A212D8Q1 G9KI47 K9KCE2 A0A2I2UFQ4 A0A2F0BMA1 A0A212C888 G1P8V1 B0LPM4 C6FGL2 Q71M99 F1MZY2 F1RQQ7 A0A2F0B4X1 D2I296 Q68Y62 F6ZD04 G1P5H8 G9KFI3 M3W4B3 M3XZ84    | 26 |
| 121 | ko00561 | Glycerolipid metabolism 甘油脂类代谢              | A0A0B5H3N2 A0A1S2ZFC8 M3W2J6 G1LHI8 M3Z4A6 M1EDJ8 A0A1S3AQK2 A0A1S3WFI0 W5NUN8 W5PPG3 A0A287AE46 A0A2I2UG45 D2H719 K7GLW0 D2HFN2 M3XST3 P00591 F1PNB8 E2RN31 F7CZV6 M3YNR9 K9IKY8 L5KQY1 L5KTT6 L5KYR8 M1ED65            | 26 |
| 122 | ko04360 | Axon guidance                               | A0A0D3L3Q9 Q2XTG2 G1NYU0 F7DYP5 W5Q9P7 F6QPD5 A9ZTJ9 A0A1S3W7C2 U6DXA9                                                                                                                                                   | 26 |

|     |         |                                           |                                                                                                                                                                                                               |    |
|-----|---------|-------------------------------------------|---------------------------------------------------------------------------------------------------------------------------------------------------------------------------------------------------------------|----|
|     |         |                                           | A0A212D8Q1 S9YL01 P61585 L5KWL7 M3YYR6 K9K4N2 M3WK78 A0A212D7R3 A0A2F0BAE6 A5D9F0 L8IUW5 B2KIK2 F7BUK0 D2H7V0 W5NUF2 F7B320 L5KWD7                                                                            |    |
| 123 | ko05230 | Central carbon metabolism in cancer       | A0A0D3L3N6 A0A0D3L3Q9 I3PVT3 A0A212CI59 F7DYP5 M3Z028 L5KWL7 A0A1S3AMF1 K9K3W3 A0A1S3WP72 M3WK78 A0A287A1G6 F7DMG5 B3IVM1 J9P208 F1MMK2 F1PHR2 F1Q3S9 F6PXA5 F6U4P2 G1LHU6 I3LK68 K9IMU0 L5KDF2 M3WYA9 W5QDD4 | 26 |
| 124 | ko05133 | Pertussis                                 | Q3S2Z6 Q2XTG2 W5Q9P7 K9K296 S9YL01 P61585 L5KWL7 W5P5I7 W5PIJ4 K9K4N2 M3WK78 A0A287AWP8 A0A2F0B4X1 A0A2F0BAE6 A0A2F0BGN3 L8IUW5 D2H306 I3LTB8 F7BLE3 F7E454 Q3T0E8 L5L7S9 L7N1L3 M3WPJ9 S9YD43                | 25 |
| 125 | ko04310 | Wnt signaling pathway                     | A0A287AGH7 K9K4J3 L5LGV5 S9XBP1 M3X2J2 G1NSY2 F6QPD5 A9ZTJ9 D2HSA3 L5K1J6 P61585 N0E6I4 J9NTH6 M3YYR6 A0A212CB56 A0A212CQS7 A0A212D7R3 A0A2F0B0W0 A5D9F0 D2H292 D2H4T8 M3Z0W9 S7MQD4 Q3T168 M3VUW7            | 25 |
| 126 | ko04072 | Phospholipase D signaling pathway         | K9K3J6 F7DYP5 K9J1H5 A0A212D8Q1 P61585 Q1JPH2 U6DQ93 L5KWL7 A0A212CB56 M3WK78 A0A212D7R3 A0A212D9M3 A0A286ZIM1 M1ER65 M3X4B4 A5GFU4 D2H4T8 D2H7V0 W5NUF2 S7MQD4 G1QDJ7 G1PZ23 G1PZY6 S7QHA4 M3VUW7            | 25 |
| 127 | ko05142 | Chagas disease (American trypanosomiasis) | U6DMG0 K9K296 A0A1S2ZUU4 S9YL01 G9KI77 L5KA87 L5KWL7 A0A212CB56 M3WK78 U5L196 D2HXP5 A0A2F0B4X1 L8IUW5 A5GFU4 D2H4T8 I3LTB8 F7BLE3 F7E454 M1ET54 S7MQD4 L5KX82 L5L7S9 L7N1L3 M3VUW7 S9XK10                    | 25 |
| 128 | ko04062 | Chemokine signaling pathway               | K9K3J6 A0A2F0AZI2 A7E3V7 A0A287AGH7 A0A287BBE2 F7DYP5 A0A1S3W7C2 D2H942 S9YL01 P61585 L5KWL7 M3YYR6 W5PP04 M1ESH1 A0A212CB56 M3WK78 F7D2Z3 A0A2F0B1P3 A0A2F0B4X1 L8IUW5 D2H4T8 F6ZBH0 S7MQD4 M3VUW7           | 24 |
| 129 | ko00040 | Pentose and glucuronate interconversions  | A0A0H5BMM4 A0A212CYP4 M3WNV6 W5NUN8 A0A287BM41 A0A2F0B958 D2GZQ2 D2H837 D2I263 E2R311 F1PNB8 F7CML9 M3YNR9 G1NZF0 G1PWU5 I1E3A6 H9L6R5 J9JHZ5 K9IX95 K9J061 L5KQY1 M3WBQ9 M3WWX5 U6CRC7                       | 24 |
| 130 | ko05110 | Vibrio cholerae infection                 | A0A287AGH7 A0A212C394 U6D6R9 A0A2F0B6Q1 L5L0U4 A0A212CV04 F1S0R1 S7MDX7 A0A287BEL0 F6Y4J0 A0A212CD21 G1NUT2 M1EFS0 A0A212CKY6 A0A212D7R3 F1SAD9 A5GFU4 S7PF41 W5NUF2 F2Z5S3 F6WGL8 L5K0I9 S7PKS0 S9XSM0       | 24 |

|     |         |                                                      |                                                                                                                                                                                              |    |
|-----|---------|------------------------------------------------------|----------------------------------------------------------------------------------------------------------------------------------------------------------------------------------------------|----|
| 131 | ko04110 | Cell cycle                                           | D2GY30 F1PKW7 L7MRQ5 M3X2J2 P62262 A0A212C000 M1EMM3 G1PW70 L5JXN5 L5K1J6 U6E0K5 D7PVJ0 U6DQD0 U6CWI2 A0A2F0B4D5 A0A2I2UZP4 J9NRH5 D2HLL8 P68509 S7NAC1 G1PHV0 G9KYF2 S9XHT1 T0M662          | 24 |
| 132 | ko05202 | Transcriptional misregulation in cancers             | Q2A135 A0A287APY0 Q9MZS6 M3YHH7 A0A2F0BAA5 U6E0K5 U6CXG9 A0A286ZIM1 A0A291L6D8 M3X4B4 A0A2F0B4X1 D2GWX2 G1LKT4 F1RRP1 G1L871 G1PHV0 G1QDJ7 G1PZ23 G1PZY6 S7QHA4 L8I2L7 L8IMA9 M3YI75 W5Q1C8  | 24 |
| 133 | ko04013 | MAPK signaling pathway - fly                         | D2GY30 A0A212CLX0 K9K3J6 F1PKW7 U6DMG0 F7DYP5 S9XBP1 K9K296 A0A212D8Q1 A0A212DI01 G9KI77 L5KWL7 L5KT76 M3YYR6 M3WK78 A0A287A8A8 U6DVA9 D2HLL8 L5JWP8 G1PK52 H9LBN5 K9J183 L5KEH1 S7NKD6      | 24 |
| 134 | ko04933 | AGE-RAGE signaling pathway in diabetic complications | Q2A135 Q3S2Z6 A0A287BBE2 F7DYP5 C0HJN6 A0A1S3W7C2 L5KWL7 M3YYR6 A0A212C4F6 A0A212CB56 M3WK78 J9P8M2 A0A212D7R3 A0A286ZY95 A0A2F0B4X1 C0HJN7 D2H4T8 F6ZBH0 W5NUF2 G1NW78 S7NJT7 S7MQD4 M3VUW7 | 23 |
| 135 | ko04071 | Sphingolipid signaling pathway                       | Q2A135 F7DYP5 S9YL01 U6DAZ5 G9KI77 P61585 A0A212CQB7 L5KA87 L5KWL7 A0A1S3ASL0 M3YYR6 A0A212CB56 M3WK78 A0A212D7R3 D2HXP5 A0A287BEZ7 A0A2F0B4X1 L8IUW5 L5KQK6 D2H4T8 S7MQD4 M3VUW7 M3XG91     | 23 |
| 136 | ko00240 | Pyrimidine metabolism                                | A0A2F0B2S3 U6D8A3 G9KHR5 M3VYG7 F1PT38 S9WVD5 A0A1S3ANF8 M1EGQ4 A0A212CHU1 A0A212CKW4 M3W7I2 A0A212D6Z1 M1ES58 D2HH20 M1EKS2 J9P266 K9KAF7 F6XLG0 L5KWC7 L5MIH7 S9WKD7 S9WT32 W5PKN0         | 23 |
| 137 | ko04970 | Salivary secretion                                   | Q29431 A0A286ZS14 A0A287AGH7 A0A2I2V1R9 M1EFM8 W5P5I7 A0A212CB56 A0A212D7R3 A5GFU4 B3SI03 D2H4T8 W5PDQ0 F1PRV8 G1L1V3 G1L555 G1LDG5 S7MQD4 G1PF04 Q3T0E8 G1QEY3 L5K5B0 M3VUW7 S7P7U1         | 23 |
| 138 | ko04973 | Carbohydrate digestion and absorption                | A0A286ZS14 A0A172ZB06 A0A212CI59 U6DB74 A0A287A042 A0A287A1G6 M3WU26 S7PEU0 B3SI03 D2HHN0 E1BGH5 F6PXA5 F6Z1M4 F7DGG1 G1PF04 G1PWG9 G1Q5E2 G9L1C1 L5K5B0 L5KDF2 M3YE08 S7P7U1 W5NU90         | 23 |
| 139 | ko00053 | Ascorbate and aldarate metabolism                    | A0A0B5H3N2 A0A0H5BMM4 D2HXD8 M3Z4A6 A0A1S3AQK2 A0A1S3WFI0 W5PPG3 A0A287BM41 D2H837 D2HFN2 E2R311 F7CML9 F7CZV6 G1PWU5 I1E3A6 H9L6R5 J9JHZ5                                                   | 23 |

|     |         |                                           |                                                                                                                                                                                      |    |
|-----|---------|-------------------------------------------|--------------------------------------------------------------------------------------------------------------------------------------------------------------------------------------|----|
|     |         |                                           | K9IKY8 L5KTT6 L5KYR8 M1ED65 M3WBQ9 M3WWX5                                                                                                                                            |    |
| 140 | ko00650 | Butanoate metabolism                      | D2I0N2 A0A212CJK6 Q52PF6 A0A212CLI9 A0A1S3WN71 M1EJZ4 K9KAF6 A0A286ZMM3 U6D0R5 F6U841 A0A2C9F3C3 Q29554 D2GXN9 U6DPX0 D2HCQ9 F1PAZ6 F1PIP0 F6Q4C8 M3W762 M3WGX6 S7N9Y3 S9XZR9 S9YMJ8 | 23 |
| 141 | ko04722 | Neurotrophin signaling pathway            | Q2A135 K9K3J6 A0A2F0AZI2 F7DYP5 P62262 K9K296 A0A1S3W7C2 D2H942 A0A212D8Q1 P61585 L5KWL7 S7NPB1 A0A2F0BMA1 M3YYR6 W5P5I7 M3WK78 Q29180 A0A2F0B4X1 A5D9F0 E2RAL0 W5NUF2 Q3T0E8 L5KN56 | 23 |
| 142 | ko04925 | Aldosterone synthesis and secretion       | A0A286ZS14 A0A287AGH7 S9XMM3 A0A1S2ZUU4 A0A2I2V1R9 M1EFM8 W5P5I7 A0A212CB56 A0A212D7R3 B0LPM4 A5D9F0 A5GFU4 B3SI03 D2H4T8 G1L1V3 M1ET54 S7MQD4 G1PF04 Q3T0E8 L5K5B0 M3VUW7 S7P7U1    | 22 |
| 143 | ko00340 | Histidine metabolism                      | A0A0B5H3N2 M3Z4A6 A0A1S3AQK2 A0A1S3WFI0 W5PPG3 L5K341 A3RF36 D2HFN2 D2HKQ9 D2HKR0 E2R134 F7CZV6 S7Q0P1 I3LK50 K9IKY8 L5KTT6 L5KYR8 M1ED65 P58027 Q3ZC84 S9WRM3 S9XRP2                | 22 |
| 144 | ko04650 | Natural killer cell mediated cytotoxicity | K9K3J6 Q3S2Z6 F7DYP5 F6QPD5 A9ZTJ9 A0A212D8Q1 L5KWL7 M3YYR6 U6D317 A0A1S6Q3A1 M3WK78 A0A212D7R3 A0A286ZIM1 M3X4B4 F2VYZ3 W5NUF2 G1PPY6 G1QDJ7 G1PZ23 G1PZY6 S7QHA4 M3W1X6            | 22 |
| 145 | ko04934 | Cushing's syndrome                        | A0A287AGH7 L5LGV5 M1EMM3 A0A1S2ZUU4 A0A2I2V1R9 D2H942 S9YL01 L5KWL7 G9KXT2 A0A212CB56 M3WK78 B0LPM4 A0A2F0B0W0 A5D9F0 L8IUW5 A5GFU4 C5I WV1 D2H4T8 D2H9H6 M1ET54 S7MQD4 M3VUW7       | 22 |
| 146 | ko04212 | Longevity regulating pathway - worm       | D2GY30 K0IVJ6 F1PKW7 U6DFP5 A0A0U2GQH0 G9KSR1 A0A1S2ZD99 A0A1S2ZMZ9 A0A1S3AFV5 W5P7J4 U6DP65 U6D5X0 A0A287A8A8 M3VXR8 D2HLL8 C6KGS5 D2HK99 G1PK52 L5KEH1 L5LQG7 M3VX55 O97492        | 22 |
| 147 | ko04919 | Thyroid hormone signaling pathway         | A0A286ZS14 A0A287AGH7 L5LGV5 F7DYP5 A0A2F0BAA5 G9KG42 U6E0K5 L5KWL7 A0A212CB56 M3WK78 A0A212D7R3 B3SI03 D2H4T8 F6ZBH0 W5NUF2 S7MQD4 G1PF04 L5K5B0 M3VUW7 S7P7U1 S9XSM0               | 21 |
| 148 | ko05222 | Small cell lung cancer                    | Q2A135 Q9MZS6 Q3S2Z6 G1Q569 Q2XTG2 F1SMF4 K9K296 M1EMM3 A0A212C632 Q2KJA7                                                                                                            | 21 |

|     |         |                                                 |                                                                                                                                                                                    |    |
|-----|---------|-------------------------------------------------|------------------------------------------------------------------------------------------------------------------------------------------------------------------------------------|----|
|     |         |                                                 | A0A1S3WM25 A0A212C4F6 J9P8M2 A0A286ZY95 A0A2F0B4X1 U6DFK3 F1MNT4 F1S663 S7NJT7 G9K7T4 S9WE42                                                                                       |    |
| 149 | ko04068 | FoxO signaling pathway                          | K9K3J6 A0A287BBE2 F7DYP5 A0A1S2ZMZ9 K4P0T7 A0A2I2UKV8 L5KWL7 U6D317 A0A212C888 M3WK78 L5LY32 U6D7Z2 A0A287A8A8 M3VXR8 C6KGS5 G1PHV0 G1PK52 G9KFI3 L5KEH1 M3W4B3 O97492             | 21 |
| 150 | ko04720 | Long-term potentiation                          | A0A287AGH7 F7DYP5 F6QPD5 A9ZTJ9 G9KI46 A0A2I2V1R9 D2H942 G9KI47 L5KWL7 A0A2F0BMA1 W5P5I7 U6D317 A0A212CB56 M3WK78 A0A212D7R3 C6FGL2 A5D9F0 D2H4T8 S7MQD4 Q3T0E8 M3VUW7             | 21 |
| 151 | ko04721 | Synaptic vesicle cycle                          | A0A212C394 A0A1S2ZBX7 U6D6R9 A0A2F0B6Q1 A0A1S2ZT41 A0A212CV04 J9NUA1 S9XFB8 G1PYC4 A0A1S3AE16 F1S0R1 W5PNM6 F6Y4J0 F7DCS5 A0A212CD21 A0A1S3WT54 M1EFS0 M1ER65 M1EKI6 G9KCH5 S7PKS0 | 21 |
| 152 | ko04390 | Hippo signaling pathway                         | D2GY30 F1PKW7 A0A0R4QSR6 L5LGV5 F6YQC6 A0A212CVT7 P62262 G9KI46 G9KI47 G9KI77 L5KA87 F6Y0D9 F6YBH2 C6FGL2 D2HXP5 A0A2F0B0W0 J9NRH5 D2HLL8 P68509 G9KYF2 S9XSM0                     | 21 |
| 153 | ko05410 | Hypertrophic cardiomyopathy (HCM)               | Q6QA25 G9KC33 Q2XTG2 F1SMF4 K4P0T7 A0A1S3AIB3 A0A212C888 M3W355 U5L196 M3YYW2 L5KNC7 U6DFK3 P67937 D2I3N9 Q3SZI2 G1PID8 K9IQG3 K9IX40 L5JWR8 S9X7J7 S9XSM0                         | 21 |
| 154 | ko04213 | Longevity regulating pathway - multiple species | A0A287AGH7 Q04967 F7DYP5 A0A1S2ZMZ9 K4P0T7 L5JPT1 A0A1S3AA38 U6E0K5 A0A212C888 A0A287A8A8 Q712P4 M3VXR8 A0A2I2UM04 M3Z7F7 C6KGS5 S4VA54 F1MWU9 G1PK52 K9K2J3 L5KEH1 O97492         | 21 |
| 155 | ko05131 | Shigellosis                                     | A0A2F0AZI2 Q2XTG2 M3VYD8 A0A1S3W7C2 M3YK01 W6FSW2 A0A287ALZ4 A0A1S3ABM4 L5KWL7 S9Y3X0 U6DVI4 M3YYR6 M3WK78 B7TYH8 A0A2F0B4X1 U6DSG3 L5JWP8 F6ZSZ5 L5KJW2 S7NKD6 S9XSM0             | 21 |
| 156 | ko04971 | Gastric acid secretion                          | A0A286ZS14 A0A287AGH7 A0A2I2V1R9 S9YL01 W5P5I7 A0A212CB56 A0A212D7R3 A0A287A9P3 A5D9F0 L8IUW5 A5GFU4 B3SI03 D2H4T8 F6YS25 S7MQD4 G1PF04 Q3T0E8 K9ILK2 L5K5B0 M3VUW7 S7P7U1         | 21 |



|     |         |                                                            |                                                                                                                                                                                 |    |
|-----|---------|------------------------------------------------------------|---------------------------------------------------------------------------------------------------------------------------------------------------------------------------------|----|
| 157 | ko00062 | Fatty acid elongation                                      | M1EBQ4 M1EJZ4 K9KAF6 Q3ZCD7 A0A2C9F3C3 L8HZ37 F1SJK6 Q29554 D2GXN9 U6DD63 F6QVW1 D2HY86 F1PAZ6 F1PIP0 K9K3H2 L5LN07 K9IJL5 K9K2H8 M1EFG8 S7N9Y3                                 | 20 |
| 158 | ko04724 | Glutamatergic synapse                                      | A7E3V7 A0A287AGH7 F6QPD5 A9ZTJ9 A0A2I2V1R9 S9YL01 L5KWL7 W5PP04 A0A1S3WP72 M1ESH1 Q8HZM5 A0A212CB56 M3WK78 A0A212D7R3 L8IUW5 A5GFU4 D2H4T8 S7MQD4 L5KX82 M3VUW7                 | 20 |
| 159 | ko04725 | Cholinergic synapse                                        | A7E3V7 A0A287AGH7 F7DYP5 A0A1S2ZUU4 A0A2I2V1R9 S9YL01 L5KWL7 W5PP04 M1ESH1 A0A212CB56 M3WK78 A0A212D7R3 B0LPM4 A5D9F0 L8IUW5 D2H4T8 M1ET54 S7MQD4 L5KX82 M3VUW7                 | 20 |
| 160 | ko05140 | Leishmaniasis                                              | W5NPE8 Q2XTG2 K9K296 L5KWL7 M3WK78 A0A286ZIM1 M3X4B4 A0A2F0B4X1 A0A2F0BIM6 F6ZBH0 I3LTB8 F7BLE3 F7E454 G1QDJ7 G1PZ23 G1PZY6 S7QHA4 L5L7S9 L7N1L3 M3W1X6                         | 20 |
| 161 | ko05226 | Gastric cancer                                             | Q2A135 K9K3J6 Q9MZS6 A0A0E3MY68 M3YHH7 K9K4J3 L5LGV5 F6YQC6 F7DYP5 L5KWL7 F6Y0D9 A0A1S3WT45 U6D317 A0A212CKB0 M3WK78 A0A286ZT61 G1QBY3 A0A2F0B0W0 L5JS44 M3Z3M9                 | 20 |
| 162 | ko04961 | Endocrine and other factor-regulated calcium reabsorption  | A0A286ZS14 A0A287AGH7 A0A1S2ZBX7 A0A1S2ZT41 G1PYC4 F7DCS5 A0A1S3WT54 A0A212CB56 A0A212D7R3 M1ER65 A5GFU4 F7D301 B3SI03 M1EKI6 D2H4T8 S7MQD4 G1PF04 L5K5B0 M3VUW7 S7P7U1         | 20 |
| 163 | ko04911 | Insulin secretion                                          | A0A286ZS14 A0A287AGH7 A0A212CI59 A0A1S2ZUU4 A0A2I2V1R9 A0A1S3AE16 G9KVB4 A0A212CB56 A0A212D7R3 B0LPM4 A5D9F0 A5GFU4 B3SI03 D2H4T8 M1ET54 S7MQD4 G1PF04 L5K5B0 M3VUW7 S7P7U1     | 20 |
| 164 | ko05120 | Epithelial cell signaling in Helicobacter pylori infection | Q3S2Z6 A0A212CU32 U6DMG0 A0A212C394 U6D6R9 A0A2F0B6Q1 L5L0U4 A0A1S3W7C2 A0A212CV04 A0A212D8Q1 F1S0R1 F6Y4J0 A0A212CD21 M3YYR6 A0A212CET4 M1EFS0 A0A2F0B4X1 W5NUF2 U6DLW6 S7PKS0 | 20 |
| 165 | ko04912 | GnRH signaling pathway                                     | K9K3J6 U6DMG0 A0A287AGH7 F7DYP5 A0A1S3W7C2 A0A1S2ZUU4 A0A2I2V1R9 L5KWL7 W5P5I7 A0A212CB56 M3WK78 A0A212D7R3 A5D9F0 A5GFU4 D2H4T8 M1ET54 S7MQD4 Q3T0E8 L5KJ27 M3VUW7             | 20 |

|     |         |                              |                                                                                                                                                              |    |
|-----|---------|------------------------------|--------------------------------------------------------------------------------------------------------------------------------------------------------------|----|
| 166 | ko04916 | Melanogenesis                | A0A287AGH7 L5LGV5 F7DYP5 S9YL01 L5KWL7 W5P5I7 A0A212CB56 M3WK78 A0A212D7R3 B0LPM4 A0A2F0B0W0 A5D9F0 L8IUW5 A5GFU4 D2H4T8 S7MQD4 Q3T0E8 L5KX82 M3VUW7         | 19 |
| 167 | ko00350 | Tyrosine metabolism          | A0A0B4J194 A0A0B4J195 A0A0B5GZG6 P00503 M3XFH2 A0N0X7 A3RF36 D2HRC4 D2HKQ9 D2HKR0 S7Q0P1 G1P0V8 I3LK50 L5LC88 N0A2M5 P58027 S9WD75 S9WMB0 S9XRP2             | 19 |
| 168 | ko04976 | Bile secretion               | A0A286ZS14 A0A287AGH7 A0A0E3MY68 F7CKV4 U6DB74 A0A212CKB0 M1EB03 A0A2I2V3F9 A5GFU4 B3SI03 F6VW89 F6YS25 G1PF04 K9IKD6 L5JS44 L5K5B0 M3YZW9 M3Z3M9 S7P7U1     | 19 |
| 169 | ko00140 | Steroid hormone biosynthesis | A0A0H5BMM4 A0A1S3AL43 I3LDJ0 A0A287BM41 L8HZ37 D2H837 X5L565 L8HWC3 Q2KIF3 F6YT02 F6ZN64 F7CML9 G1PWU5 Q6RJ34 I1E3A6 H9L6R5 I3L7D6 J9JHZ5 M3WWX5             | 19 |
| 170 | ko04713 | Circadian entrainment        | A7E3V7 A0A287AGH7 A0A2I2V1R9 S9YL01 L5KWL7 W5PP04 W5P5I7 M1ESH1 A0A212CB56 M3WK78 A0A212D7R3 A5D9F0 L8IUW5 A5GFU4 D2H4T8 S7MQD4 Q3T0E8 L5KX82 M3VUW7         | 19 |
| 171 | ko04978 | Mineral absorption           | K0IVJ6 D2HUG1 A0A286ZS14 U6DB74 G9KM89 P09571 B3SI03 F1MWK1 Q6Q2K4 F6V1W9 P27425 G1P4I2 L5KIE0 G1PF04 L5K5B0 L5L4J6 S7P7U1 S9XM15 S9Z0D9                     | 19 |
| 172 | ko04979 | Cholesterol metabolism       | A0A1S2ZBH9 A0A1S2ZIQ2 A0A1S2ZQP1 A0A1S3WDZ0 A0A1S3A1Q0 K9K2M3 K9KEY5 U6D655 A0A2F0BCM3 W5PW62 D2HC77 S7NE46 F1P8Z5 L5KB14 M3W955 P0DM92 M3XYH5 P0DMA9 W5Q5C8 | 19 |
| 173 | ko05160 | Hepatitis C                  | K9K3J6 A0A287BBE2 F7DYP5 K9K296 D2HA56 M1EMG4 G9KI77 L5KA87 L5KWL7 A0A2F0B658 U6D317 M3WK78 W5PMF3 D2HXP5 A0A2F0B4X1 F6ZBH0 Q6R757 U6D6A6 M3XDB7             | 19 |
| 174 | ko05416 | Viral myocarditis            | W5NPE8 Q3S2Z6 G1Q569 M3YYR6 A0A1S6Q3A1 A0A2F0B929 A0A286ZIM1 D2HRX3 M3X4B4 A0A2F0BIM6 F2VYZ3 D2H2A5 Q7YS39 G1QDJ7 G1PZ23 G1PZY6 S7QHA4 S9XSM0                | 18 |

|     |         |                                                        |                                                                                                                                                    |    |
|-----|---------|--------------------------------------------------------|----------------------------------------------------------------------------------------------------------------------------------------------------|----|
| 175 | ko04730 | Long-term depression                                   | F7DYP5 A0A1S2ZUU4 A0A2I2V1R9 S9YL01 G9KI77 L5KWL7 U6D317 A0A212CB56 M3WK78 A0A212D7R3 D2HXP5 L8IUW5 A5GFU4 D2H4T8 M1ET54 S7MQD4 L5KX82 M3VUW7      | 18 |
| 176 | ko05412 | Arrhythmogenic right ventricular cardiomyopathy (ARVC) | Q2XTG2 M3YHH7 L5LGV5 F6YQC6 F1SMF4 A0A1S2ZTH8 A0A1S3AIB3 M3YYW2 L5KNC7 U6DFK3 Q3SIZI F1RW75 L5KUY4 K9IQG3 L5JWR8 M3WCK3 S9XSM0 W5Q7Z7              | 18 |
| 177 | ko04640 | Hematopoietic cell lineage                             | W5NPE8 F1SMF4 A0A1S3A1Q0 A0A286ZIM1 M3X4B4 A0A2F0BIM6 D2GWX2 U6DFK3 L8IHS5 F5C3N2 G1QDJ7 G1PZ23 G1PZY6 S7QHA4 L8IMA9 M1EEE1 S9XHY8 S9XTJ0          | 18 |
| 178 | ko04920 | Adipocytokine signaling pathway                        | A0A287BBE2 A0A2F0BFT8 A0A1S3A1Q0 K4P0T7 A0A212D8Q1 A0A212C888 A0A287AQX2 A0A2F0B4X1 G1MAJ7 D2I296 F1Q0U3 Q68Y62 G9KFI3 K9IMX4 L5JZV3 M3W4B3 M3XZ84 | 17 |
| 179 | ko00760 | Nicotinate and nicotinamide metabolism                 | I3L939 A0A1S3ANF8 A0A1S3WG49 M3XFH2 A0A212CKW4 A0A212CQ65 A0A2F0BMP6 F6YLK4 G1LJ70 M1EKS2 K9KAF7 F6XLG0 G9KCG8 J9P673 L5KJ65 S9WT32 T0MHG4         | 17 |
| 180 | ko05031 | Amphetamine addiction                                  | A0A287AGH7 F6QPD5 A9ZTJ9 G9KI46 G9KI47 W5P5I7 A0A212D7R3 B0LPM4 C6FGL2 A5D9F0 A5GFU4 D2HKQ9 D2HKR0 S7Q0P1 Q3T0E8 P58027 S9XRP2                     | 17 |
| 181 | ko03008 | Ribosome biogenesis in eukaryotes                      | S9WFB3 G1NSY2 U6DUB7 D2HSA3 A0A287AI22 G1PN53 U6E164 U6D0E4 Q3T054 N0E6I4 D2I6U5 L5KT76 K9K9C1 G9KDC1 L5K0V6 L5K785 L5L2X2                         | 17 |
| 182 | ko04214 | Apoptosis - fly                                        | U6DFP5 G1Q569 F7DYP5 K9K296 A0A212D6L2 L5KWL7 K9KAV0 W5PIJ4 D2HAI8 A0A287A6X5 M3WK78 A0A2F0B5C1 L5KM19 F7BFT1 G1PHV0 K9IR86 L5KKR7                 | 17 |
| 183 | ko04924 | Renin secretion                                        | A0A287AGH7 F6QPD5 A9ZTJ9 A0A2I2V1R9 S9YL01 W5P5I7 A0A212CB56 U5L196 B7X6D1 A0A2F0BJ67 L8IUW5 A5GFU4 D2H4T8 S7MQD4 Q3T0E8 M3VUW7 M3WTS2             | 17 |
| 184 | ko00260 | Glycine, serine and threonine metabolism               | A0A1S2ZT56 M3Z028 A0A1S3WU17 A0A212CHA3 M1ENI4 A0A212CZ82 A0A212DF69 F6QTI9 D2HKQ9 D2HKR0 G9KGC8 E2RDY8 E2RN31 F7CZV6 S7Q0P1 P58027 S9XRP2         | 17 |
| 185 | ko05323 | Rheumatoid arthritis                                   | W5NPE8 A0A212C394 U6D6R9 A0A2F0B6Q1 A0A212CV04 F1S0R1 F6Y4J0 A0A212CD21 M1EFS0 A0A286ZIM1 M3X4B4 A0A2F0BIM6 G1QDJ7 G1PZ23 G1PZY6 S7QHA4 S7PKS0     | 17 |
| 186 | ko00670 | One carbon pool by folate                              | A0A1S2ZZD3 A0A1S3AD46 A0A212DF69 A0A2I2V315 E1BMG9 D2GYI7 L8IBZ7 F1P797 F6XNH4 F6YIU8 M3YKZ7 J9NS37 H9H007 L5JYI0 L5LYR4 M3VWP3 Q0VCK0             | 17 |

|     |         |                                         |                                                                                                                                        |    |
|-----|---------|-----------------------------------------|----------------------------------------------------------------------------------------------------------------------------------------|----|
| 187 | ko04140 | Autophagy - animal                      | D2H018 A0A287AGH7 F7DYP5 K9J1H5 K9K296 M1EMG4 A0A2F0B503 G9KJV2 G9KI77 L5KWL7 A0A212C888 M3WK78 B7X6D1 L5KQK6 D2H7V0 D2HLC6 U6DS89     | 17 |
| 188 | ko04111 | Cell cycle - yeast                      | L7MRQ5 A0A212CVT7 M3X2J2 A0A212C000 G1PW70 L5JXN5 G9KI77 L5K1J6 L5KA87 K9KC79 U6DQD0 D2HXP5 U6CWI2 A0A2F0B4D5 A0A2I2UZP4 S9XHT1 T0M662 | 17 |
| 189 | ko01040 | Biosynthesis of unsaturated fatty acids | M1EBQ4 K9KAF6 Q3ZCD7 A0A2I2UME7 L8HZ37 F1SJK6 Q29554 D2GXN9 G1MHF7 F1PIP0 G1LTX1 K9IM30 L5MDE3 M1ECB8 M3WMB8 S7N9Y3 T0MFV8             | 17 |
| 190 | ko04657 | IL-17 signaling pathway                 | Q9GKX7 Q3S2Z6 K9K296 L5KWL7 A0A287A9T4 U6D9S5 U6DJ93 M3WK78 A0A2F0B4X1 A0A2F0BD37 C3S7K6 K9J3P9 G1L555 M3XDB7 L5KIH3 L8IEQ9 S7Q8R8     | 17 |
| 191 | ko05215 | Prostate cancer                         | Q9GKX7 K9K3J6 L5LGV5 F7DYP5 L5KWL7 A0A287A9T4 U6D317 M3WK78 B0LPM4 A0A2F0B4X1 D2GWX2 K9J3P9 L8I2L7 L5KIH3 L8IEQ9 S7Q8R8                | 16 |
| 192 | ko05144 | Malaria                                 | P04237 P14392 S9WA55 A0A1S3A1Q0 Q28194 A0A220IG95 P24660 G3MZ21 S7NE46 F1RII5 Q9XSN3 P01962 S9X3Z7 P02058 Q28743 Q95MA1                | 16 |
| 193 | ko04011 | MAPK signaling pathway - yeast          | A7E3V7 P62262 A0A1S2ZMZ9 A0A1S3W7C2 L5L3W4 P61585 L5KWL7 K9KC79 K9KE00 M3WK78 A0A212D7R3 M3VXR8 C6KGS5 G1L318 K9IXE2 O97492            | 16 |
| 194 | ko04662 | B cell receptor signaling pathway       | K9K3J6 F7DYP5 F6QPD5 A9ZTJ9 L5KWL7 W5QDG3 M3YYR6 M3WK78 A0A286ZIM1 M3X4B4 A0A2F0B4X1 G1QDJ7 G1PZ23 G1PZY6 S7QHA4 M3W1X6                | 16 |
| 195 | ko00590 | Arachidonic acid metabolism             | A0A1S3AL43 U6DM40 K9ITA7 I3LDJ0 A0A2F0B9R0 M3W9X2 U6DK75 Q2KIF3 F6UYM8 F7E352 L8IG93 S7NJS2 I3L7D6 L7N0B9 M3XC10 S9W5L9                | 16 |
| 196 | ko05211 | Renal cell carcinoma                    | K9K3J6 A0A2F0AZI2 G1NYU0 F7DYP5 A0A1S3W7C2 D2H942 A0A212D8Q1 L5KWL7 L5LNB4 M3YYR6 U6D317 A0A1S3WVF1 M3WK78 C5I WV1 D2H9H6 W5Q1C8       | 16 |
| 197 | ko04138 | Autophagy - yeast                       | P61157 A0A287AGH7 F7DYP5 S7QAL8 M1EMG4 S9XFB8 G9KJV2 G9KI77 W5PNM6 M3Y473 A0A1S3ASL0 D2HLC6 G9KCH5 S7PHJ7 L5LM48 U6DS89                | 16 |
| 198 | ko04070 | Phosphatidylinositol signaling system   | U6DQF4 A0A2I2V1R9 L5LMN0 A0A2F0BDQ9 W5QDG3 W5P5I7 A0A212CB56 G9K6E9 A0A212D7R3 D2H4T8 W5NUF2 S7MQD4 Q3T0E8 S7PHJ7 M3VUW7 M3W205        | 16 |
| 199 | ko04113 | Meiosis - yeast                         | A0A287AGH7 A0A212C000 G9KI46 G1PW70 G9KI47 U6DAZ5 L5JXN5 G9KI77 A0A212CQB7 C6FGL2 D2HXP5 U6CWI2 A0A2F0B4D5 A0A2I2UZP4 S9XHT1 T0M662    | 16 |

|     |         |                                                  |                                                                                                                                  |    |
|-----|---------|--------------------------------------------------|----------------------------------------------------------------------------------------------------------------------------------|----|
| 200 | ko03060 | Protein export                                   | K9J2T4 F1SUP2 Q32PD3 L8HQD7 U6CX86 S7MDX7 A0A2F0BDA5 G1NUT2 G9KMW0 G9KR72 F1MNI2 A0A2F0AZX0 A0A2I2U915 S9XP01 F2Z5S3 F6YG82      | 16 |
| 201 | ko00562 | Inositol phosphate metabolism                    | U6DQF4 L5LMN0 A0A2F0BDQ9 A0A1S3AM12 W5QDG3 A0A212CB56 G9K6E9 D0G7F6 D2H4T8 W5NUF2 F1PBE6 S7MQD4 S7PHJ7 M3VUW7 M3W205             | 15 |
| 202 | ko00220 | Arginine biosynthesis                            | A0A0B4J194 A0A0B4J195 L8HNN2 P00503 J9P7J1 F1Q2N5 A0A1S3WP72 Q8HZM5 A0A1W2JPN4 G9K3A6 U6D6A9 D2GWW2 E2RJ62 G1P0V8 M1EBT9         | 15 |
| 203 | ko00510 | N-Glycan biosynthesis                            | G9KRR7 G9KRR6 S9X7P1 A0A212C9D9 A0A2F0AX35 A0A2I2UR06 M3Y7C5 E2RQ08 F6WQI9 K9K284 F7C4D4 G1QGG2 M3XE28 M3YQN2 S9YH06             | 15 |
| 204 | ko04137 | Mitophagy - animal                               | A0A2F0B1P7 A0A2F0AUB7 F7DYP5 G1NSY2 K9J1H5 D2HSA3 A0A212D6L2 G9KJV2 N0E6I4 M1ERK4 U6DEL0 A0A2F0B4X1 D2H7V0 M3XDB7 U6DS89         | 15 |
| 205 | ko04750 | Inflammatory mediator regulation of TRP channels | A0A287AGH7 G9KI46 A0A2I2V1R9 G9KI47 W5P5I7 A0A212CB56 A0A212D7R3 C6FGL2 A5D9F0 A5GFU4 D2H4T8 W5NUF2 S7MQD4 Q3T0E8 M3VUW7         | 15 |
| 206 | ko04962 | Vasopressin-regulated water reabsorption         | A0A287AGH7 S9XFB8 K9KD93 A0A1S3WR90 S7NPB1 U6CP53 B0LPM4 A0A287AWV1 Q29180 A5GFU4 F7D301 E1BDX8 E2RAL0 L5KN56 M3XUR8             | 15 |
| 207 | ko04625 | C-type lectin receptor signaling pathway         | F7DYP5 F6QPD5 K9J1H5 A9ZTJ9 A0A2I2V1R9 A0A212D8Q1 P61585 L5KWL7 W5P5I7 M3WK78 A0A2F0B4X1 A0A2F0BGN3 D2H7V0 F6ZBH0 Q3T0E8         | 15 |
| 208 | ko04211 | Longevity regulating pathway - mammal            | Q2A135 A0A212CM85 A0A287AGH7 F7DYP5 A0A1S2ZMZ9 K4P0T7 A0A212C888 B0LPM4 A0A287A8A8 A0A2F0B4X1 M3VXR8 C6KGS5 G1PK52 L5KEH1 O97492 | 15 |
| 209 | ko04727 | GABAergic synapse                                | A7E3V7 A0A287AGH7 A0A1S2ZWY5 S9YL01 S9XFB8 W5PP04 A0A1S3WN71 A0A1S3WP72 M1ESH1 Q8HZM5 A0A212D7R3 A0A286ZMM3 L8IUW5 D2HCQ9 L5KX82 | 15 |
| 210 | ko04664 | Fc epsilon RI signaling pathway                  | K9K3J6 U6DMG0 F7DYP5 L5KWL7 W5QDG3 M3YYR6 M3WK78 A0A212D7R3 A0A286ZIM1 M3X4B4 W5NUF2 G1QDJ7 G1PZ23 G1PZY6 S7QHA4                 | 15 |
| 211 | ko04964 | Proximal tubule bicarbonate reclamation          | A0A286ZS14 L8HNN2 F7CKV4 F1Q2N5 A0A1S3WP72 B3SI03 F6YS25 G1PF04 G9KFI3 L5K5B0 L5KT65 W5QFQ0 M3W4B3 S7P7U1                        | 14 |
| 212 | ko05014 | Amyotrophic lateral sclerosis (ALS)              | Q2A135 Q3S2Z6 A0A212CEB3 G1Q569 F6QPD5 A9ZTJ9 A0A1S2ZMZ9 G9KUM4 M3YYR6 G1Q0B8 Q712P4 M3VXR8 C6KGS5 O97492                        | 14 |

|     |         |                                |                                                                                                                      |    |
|-----|---------|--------------------------------|----------------------------------------------------------------------------------------------------------------------|----|
| 213 | ko04659 | Th17 cell differentiation      | Q9GKX7 W5NPE8 A0A287BBE2 U6DM87 F6QPD5 A9ZTJ9 L5KWL7 A0A287A9T4 M3WK78<br>A0A2F0B4X1 A0A2F0BIM6 F6ZBH0 W5NUF2 S7Q8R8 | 14 |
| 214 | ko00930 | Caprolactam degradation        | D2HXD8 W5NUN8 M1EJZ4 K9KAF6 A0A2C9F3C3 Q29554 D2GXN9 U6DPX0 F1PAZ6 F1PIP0<br>M3YNR9 M3W762 S7N9Y3                    | 13 |
| 215 | ko05224 | Breast cancer                  | Q2A135 K9K3J6 Q9MZS6 K9K4J3 L5LGV5 F7DYP5 M1EMM3 L5KWL7 U6D317 M3WK78<br>A0A2F0B0W0 D6MZW9 B5SRK4                    | 13 |
| 216 | ko05214 | Glioma                         | Q2A135 K9K3J6 Q9MZS6 F7DYP5 M1EMM3 L5KWL7 W5P5I7 U6D317 M3WK78<br>A0A212D7R3 A5D9F0 W5NUF2 Q3T0E8                    | 13 |
| 217 | ko04064 | NF-kappa B signaling pathway   | G1NSY2 K9K296 D2HSA3 N0E6I4 A0A286ZIM1 M3X4B4 A0A2F0B4X1 W5NUF2 G1PHV0<br>G1QDJ7 G1PZ23 G1PZY6 S7QHA4                | 13 |
| 218 | ko05210 | Colorectal cancer              | Q2A135 K9K3J6 Q9MZS6 Q3S2Z6 G1Q569 L5LGV5 F7DYP5 P61585 Q1JPH2 L5KWL7<br>M3YYR6 U6D317 M3WK78                        | 13 |
| 219 | ko05220 | Chronic myeloid leukemia       | Q2A135 K9K3J6 Q9MZS6 A0A2F0AZI2 F7DYP5 M1EMM3 A0A212D8Q1 U6E0K5 L5KWL7<br>J9NTH6 U6D317 M3WK78 A0A2F0B4X1            | 13 |
| 220 | ko05212 | Pancreatic cancer              | Q2A135 Q9MZS6 A0A287BBE2 F7DYP5 M1EMM3 A0A1S3W7C2 Q1JPH2 L5KWL7 M3YYR6<br>U6D317 M3WK78 A0A2F0B4X1 F6ZBH0            | 13 |
| 221 | ko02010 | ABC transporters ABC           | U6CZF8 A0A0E3MY68 A0A1S3AFE9 A0A1S3WH34 A0A212CKB0 M1EB03 K9IMZ3 H8ZYZ4<br>F6VW89 S7NIK8 L5JS44 M3YZW9 M3Z3M9        | 13 |
| 222 | ko05223 | Non-small cell lung cancer     | Q2A135 K9K3J6 Q9MZS6 A0A287BBE2 F7DYP5 M1EMM3 L5KWL7 U6D317 M3WK78<br>A0A212D7R3 U6D7Z2 F1S4U9 W5NUF2                | 13 |
| 223 | ko04391 | Hippo signaling pathway -fly   | D2GY30 F1PKW7 A0A0R4QSR6 A0A212CVT7 P62262 G9KI77 L5KA87 F6YBH2 A0A212CI42<br>D2HXP5 D2HLL8 S9XSM0                   | 12 |
| 224 | ko00564 | Glycerophospholipid metabolism | L5L3W4 A0A1S2ZTL7 M1EDJ8 U6E0B4 A0A1S3WVY8 U6DM40 M1ESK5 G9K922 D2HIZ8<br>G1L318 K9IXE2 L5K7F9                       | 12 |
| 225 | ko00360 | Phenylalanine metabolism       | A0A0B4J194 A0A0B4J195 P00503 A3RF36 D2HRC4 D2HKQ9 D2HKR0 S7Q0P1 G1P0V8<br>I3LK50 P58027 S9XRP2                       | 12 |

|     |         |                                           |                                                                                                     |    |
|-----|---------|-------------------------------------------|-----------------------------------------------------------------------------------------------------|----|
| 226 | ko04977 | Vitamin digestion and absorption          | A0A1S2ZBH9 A0A1S2ZG86 A0A1S2ZQP1 A0A2F0BCM3 D2HC77 P00591 F1P8Z5 G9KKJ8 M3W955 P0DM92 M3XYH5 P0DMA9 | 12 |
| 227 | ko05216 | Thyroid cancer                            | Q2A135 Q9MZS6 Q6QA25 L5LGV5 F7DYP5 L5KWL7 F6Y0D9 A0A212C3U9 M3WK78 S9WYG5 K9J6G7 S9X7J7             | 12 |
| 228 | ko04660 | T cell receptor signaling pathway         | K9K3J6 G1NYU0 F7DYP5 F6QPD5 A9ZTJ9 A0A1S3W7C2 P61585 L5KWL7 M3WK78 A0A2F0B4X1 W5NUF2 M3W1X6         | 12 |
| 229 | ko05020 | Prion diseases                            | Q2A135 A0A287AGH7 L5KWL7 M3WK78 A0A287AWP8 Q712P4 Q3ZBZ8 T0NNF3 D2H306 F1S663 F6YG82 S9WE42         | 12 |
| 230 | ko04370 | VEGF signaling pathway                    | F7DYP5 F6QPD5 A9ZTJ9 A0A1S3W7C2 L5KWL7 M3YYR6 M3WK78 A0A212D7R3 F7D2Z3 D2HM81 A0A2F0B1P3 W5NUF2     | 12 |
| 231 | ko04630 | Jak-STAT signaling pathway                | K9K3J6 A0A287BBE2 U6DM87 S7MXD2 A0A212D8Q1 M3XFH2 A0A1S3WQJ7 W5PP64 F6ZBH0 G1PRD4 M3W1X6            | 11 |
| 232 | ko04914 | Progesterone-mediated oocyte maturation   | Q9GKX7 A0A287AGH7 F7DYP5 S9YL01 L5KWL7 A0A287A9T4 A0A2F0BMA1 U6D317 M3WK78 L8IUW5 S7Q8R8            | 11 |
| 233 | ko00513 | Various types of N-glycan biosynthesis    | G9KRR7 G9KRR6 S9X7P1 A0A212C9D9 A0A2F0AX35 A0A2I2UR06 M3Y7C5 E2RQ08 F6WQI9 K9K284 G9K475            | 11 |
| 234 | ko04960 | Aldosterone-regulated sodium reabsorption | A0A286ZS14 F7DYP5 L5KWL7 M3WK78 A0A212D7R3 B3SI03 G1PF04 S7NAC1 Q6RJ34 L5K5B0 S7P7U1                | 11 |
| 235 | ko05030 | Cocaine addiction                         | A0A287AGH7 S9YL01 B0LPM4 A0A2F0B4X1 L8IUW5 A5GFU4 D2HKQ9 D2HKR0 S7Q0P1 P58027 S9XRP2                | 11 |
| 236 | ko00790 | Folate biosynthesis                       | A0A212D327 A0A1S2ZS78 A0A1S2ZWY5 A0A212DHX7 D2H0C8 F1PNB8 J9NS37 U6D6F6 I3L7D6 L5KQY1 M3XC10        | 11 |
| 237 | ko04930 | Type II diabetes mellitus                 | A0A212CI59 L5KWL7 A0A1S3AMF1 M3WK78 A0A287A1G6 B3IVM1 F1PHR2 F6PXA5 G1LHU6 L5KDF2 M3WYA9            | 11 |
| 238 | ko00920 | Sulfur metabolism                         | G1Q569 A0A1S2ZCQ6 A0A212CDD0 A0A286ZTN2 A0A2I2UBM3 G1L1E2 D2HNF2 F6ULU1 E2R864 F6RYZ0 G1NYN6        | 11 |

|     |         |                                           |                                                                                              |    |
|-----|---------|-------------------------------------------|----------------------------------------------------------------------------------------------|----|
| 239 | ko05213 | Endometrial cancer                        | Q2A135 K9K3J6 Q9MZS6 L5LGV5 F6YQC6 F7DYP5 U6DXA9 L5KWL7 F6Y0D9 U6D317 M3WK78                 | 11 |
| 240 | ko04012 | ErbB signaling pathway                    | K9K3J6 A0A2F0AZI2 U6DMG0 G1NYU0 F7DYP5 L5KWL7 U6D317 M3WK78 A0A212D7R3 A5D9F0 W5NUF2         | 11 |
| 241 | ko04514 | Cell adhesion molecules (CAMs)            | W5NPE8 W5P6V4 Q2XTG2 F6Y0D9 A0A212C3I9 A0A1S6Q3A1 A0A212CET4 W5PMF3 A0A2F0BIM6 F2VYZ3 U6DFK3 | 11 |
| 242 | ko01521 | EGFR tyrosine kinase inhibitor resistance | Q2A135 A0A212CM85 K9K3J6 A0A287BBE2 F7DYP5 W5QF03 L5KWL7 U6D317 M3WK78 A0A212D7R3 W5NUF2     | 11 |
| 243 | ko02020 | Two-component system                      | G1Q569 A0A212D327 Q8HZM5 U6D0R5 L5KJ87 U6CRD9 M3W4G8 M3WGX6 S9XZR9 S9YMJ8                    | 10 |
| 244 | ko04658 | Th1 and Th2 cell differentiation          | W5NPE8 U6DM87 F6QPD5 A9ZTJ9 L5KWL7 M3WK78 A0A2F0B4X1 A0A2F0BIM6 F6ZBH0 W5NUF2                | 10 |
| 245 | ko05330 | Allograft rejection                       | W5NPE8 A0A1S6Q3A1 A0A286ZIM1 M3X4B4 A0A2F0BIM6 F2VYZ3 G1QDJ7 G1PZ23 G1PZY6 S7QHA4            | 10 |
| 246 | ko04927 | Cortisol synthesis and secretion          | A0A287AGH7 A0A1S2ZUU4 A0A212V1R9 A0A212CB56 B0LPM4 A5GFU4 D2H4T8 M1ET54 S7MQD4 M3VUW7        | 10 |
| 247 | ko05221 | Acute myeloid leukemia                    | K9K3J6 A0A287BBE2 M3YHH7 F7DYP5 L5KWL7 U6D317 M3WK78 A0A2F0B4X1 F1RRP1 L8IMA9                | 10 |
| 248 | ko04380 | Osteoclast differentiation                | K9K3J6 F6QPD5 A9ZTJ9 K9K296 L5KWL7 M3YYR6 M3WK78 A0A2F0B4X1 F6ZBH0 L8IMA9                    | 10 |
| 249 | ko03030 | DNA replication                           | L7MSN1 K9K201 G1PW70 D7PVJ0 U6CW12 A0A2F0B4D5 U6DVT5 L5KWC7 S9XHT1 T0M662                    | 10 |
| 250 | ko05320 | Autoimmune thyroid disease                | W5NPE8 A0A1S6Q3A1 A0A286ZIM1 M3X4B4 A0A2F0BIM6 F2VYZ3 G1QDJ7 G1PZ23 G1PZY6 S7QHA4            | 10 |
| 251 | ko04626 | Plant-pathogen interaction                | Q9GKX7 A0A287A9T4 W5P5I7 K7GLW0 G1LPV1 K9J3P9 Q3T0E8 L5KIH3 L8IEQ9 S7Q8R8                    | 10 |
| 252 | ko04966 | Collecting duct acid secretion            | A0A212C394 U6D6R9 A0A2F0B6Q1 A0A212CV04 F1S0R1 F6Y4J0 A0A212CD21 M1EFS0                      | 10 |



|     |         |                                                          |                                                                                   |    |
|-----|---------|----------------------------------------------------------|-----------------------------------------------------------------------------------|----|
|     |         |                                                          | F6YS25 S7PKS0                                                                     |    |
| 253 | ko00625 | Chloroalkane and chloroalkene degradation                | A0A0B5GZG6 A0A0B5H3N2 M3Z4A6 A0A1S3WFI0 D2HFN2 K9IKY8 L5KTT6 L5LC88 M1ED65 S9WD75 | 10 |
| 254 | ko04350 | TGF-beta signaling pathway                               | M3X2J2 G9KI77 L5K1J6 P61585 L5KWL7 D7NPV5 Q28194 M3WK78 D2HXP5                    | 9  |
| 255 | ko04139 | Mitophagy - yeast                                        | G1NSY2 D2HSA3 A0A2F0BAA5 N0E6I4 G9K838 D2HRD5 K9KAV0 A0A212D7R3 M1ERK4            | 9  |
| 256 | ko01523 | Antifolate resistance                                    | A0A212DF69 M1EB03 A0A2F0B4X1 F1P797 F6VW89 J9NS37 L5JYI0 M3YZW9 Q0VCK0            | 9  |
| 257 | ko04115 | p53 signaling pathway                                    | Q2A135 Q3S2Z6 G1Q569 M1EMM3 A4FV69 Q28194 D2IIG7 S7NAC1 G1PHV0                    | 9  |
| 258 | ko03440 | Homologous recombination                                 | S9X2K9 L7MSN1 K9K201 L5LIY6 M1EK55 U6DVT5 D6MZW9 B5SRK4 G1PHV0                    | 9  |
| 259 | ko00592 | alpha-Linolenic acid metabolism $\alpha$                 | U6DM40 A0A2I2UME7 G1MHF7 G1LTX1 K9IM30 L5MDE3 M1ECB8 M3WMB8 T0MFV8                | 9  |
| 260 | ko04917 | Prolactin signaling pathway                              | K9K3J6 A0A287BBE2 A0A212CI59 F7DYP5 L5KWL7 M3WK78 A0A2F0B4X1 F6ZBH0 L5KEY5        | 9  |
| 261 | ko05032 | Morphine addiction                                       | A7E3V7 A0A287AGH7 S9YL01 W5PP04 M1ESH1 A0A212D7R3 L8IUW5 A5GFU4 L5KX82            | 9  |
| 262 | ko00627 | Aminobenzoate degradation                                | M1EJZ4 K9KAF6 Q29554 D2GXN9 U6DPX0 F1PAZ6 F1PIP0 M3W762 S7N9Y3                    | 9  |
| 263 | ko05310 | Asthma                                                   | W5NPE8 A0A286ZIM1 M3X4B4 A0A2F0BIM6 G1QDJ7 G1PZ23 G1PZY6 S7QHA4 L5JS01            | 9  |
| 264 | ko05340 | Primary immunodeficiency                                 | A0A1S3WH34 A0A286ZIM1 M3X4B4 H8ZYZ4 G1QDJ7 G1PZ23 G1PZY6 S7QHA4 L5JXN2            | 9  |
| 265 | ko04620 | Toll-like receptor signaling pathway                     | U6DMG0 K9K296 L5KWL7 M3YYR6 M3WK78 D2HDR7 A0A2F0B4X1 F6ZBH0 M3XDB7                | 9  |
| 266 | ko04614 | Renin-angiotensin system                                 | E2DHI6 U5L196 L8I7H3 D2HMF7 L8IHS5 F5C3N2 F1PHW5 M1EEE1 S9XTJ0                    | 9  |
| 267 | ko04745 | Phototransduction - fly                                  | W5P5I7 A0A212CB56 A0A212D7R3 A5D9F0 D2H4T8 S7MQD4 Q3T0E8 M3VUW7 S9XSM0            | 9  |
| 268 | ko00950 | Isoquinoline alkaloid biosynthesis                       | A0A0B4J194 A0A0B4J195 P00503 D2HKQ9 D2HKR0 S7Q0P1 G1P0V8 P58027 S9XRP2            | 9  |
| 269 | ko04550 | Signaling pathways regulating pluripotency of stem cells | K9K3J6 A0A287BBE2 L5LGV5 F7DYP5 L5KWL7 M3WK78 A0A2F0B0W0 E2RIZ5 G1PRD4            | 9  |
| 270 | ko04672 | Intestinal immune network for IgA production             | W5NPE8 A0A286ZIM1 M3X4B4 A0A2F0BIM6 G1QDJ7 G1PZ23 G1PZY6 S7QHA4                   | 8  |

|     |         |                                            |                                                                             |   |
|-----|---------|--------------------------------------------|-----------------------------------------------------------------------------|---|
| 271 | ko04215 | Apoptosis - multiple species               | Q2A135 Q9MZS6 Q3S2Z6 G1Q569 W5PIJ4 A0A287A6X5 A0A2F0B5C1 M3YV15             | 8 |
| 272 | ko05231 | Choline metabolism in cancer               | K9K3J6 F7DYP5 A0A1S3ABM4 L5KWL7 M3YYR6 M3WK78 A0A212D7R3 W5NUF2             | 8 |
| 273 | ko00120 | Primary bile acid biosynthesis             | D2H2E7 F6R7L1 M3XP30 M3VY35 L8IU61 M3YZN5 Q6RFZ6 U6CSC4                     | 8 |
| 274 | ko04622 | RIG-I-like receptor signaling pathway      | A0A0K0QRG9 K9K296 A0A1S3WBU4 A0A2F0BJT6 A0A287AE46 A0A2F0B4X1 U6D888 M3XDB7 | 8 |
| 275 | ko03420 | Nucleotide excision repair                 | A0A1S3A715 U6DL70 L7MSN1 K9K201 D7PVJ0 A0A2F0BKC4 U6DVT5 Q3B7N6             | 8 |
| 276 | ko05218 | Melanoma                                   | Q2A135 Q9MZS6 F7DYP5 M1EMM3 L5KWL7 F6Y0D9 U6D317 M3WK78                     | 8 |
| 277 | ko00072 | Synthesis and degradation of ketone bodies | D2I0N2 A0A212CJ6 A0A212CLI9 U6D0R5 F6Q4C8 M3WGX6 S9XZR9 S9YMJ8              | 8 |
| 278 | ko04668 | TNF signaling pathway                      | Q3S2Z6 U6DMG0 L5KWL7 K9KAV0 W5PIJ4 M3WK78 B0LPM4 A0A2F0B4X1                 | 8 |
| 279 | ko01522 | Endocrine resistance                       | Q2A135 K9K3J6 A0A287AGH7 F7DYP5 L5KWL7 U6D317 M3WK78 A5GFU4                 | 8 |
| 280 | ko00061 | Fatty acid biosynthesis                    | A0A2F0BFT8 A0A287AQX2 G1MAJ7 F1Q0U3 K9IMX4 L5JZV3 U6D3C6                    | 7 |
| 281 | ko00900 | Terpenoid backbone biosynthesis            | A0A212BZM9 G1NXQ4 U6D0R5 U6DKJ3 M3WGX6 S9XZR9 S9YMJ8                        | 7 |
| 282 | ko02024 | Quorum sensing                             | K9J2T4 A0A2F0BFT8 A0A287AQX2 G1MAJ7 F1Q0U3 K9IMX4 L5JZV3                    | 7 |
| 283 | ko00910 | Nitrogen metabolism                        | L8HNN2 A0A1S3AI23 F1Q2N5 Q8HZM5 A0A1W2JPN4 L8I2Y5 F6YS25                    | 7 |
| 284 | ko00450 | Selenocompound metabolism                  | A0A212CHA3 G1L1E2 E2RDY8 W5P929 M3YKX1 F6RYZ0 G1NYN6                        | 7 |
| 285 | ko00770 | Pantothenate and CoA biosynthesis          | A0A1S3AHY6 M4WXC2 M1EKS2 U6DUM4 F1S3Q7 K9IKX5 T0MHU2                        | 7 |
| 286 | ko04623 | Cytosolic DNA-sensing pathway              | G9KHR5 S9WVD5 M3W7I2 A0A2F0B4X1 A0A2F0BGN3 M3XDB7 S9WKD7                    | 7 |
| 287 | ko04130 | SNARE interactions in vesicular transport  | A0A287A4A5 S7QAL8 W5Q6G5 F7BYV5 L8ITP8 U6DZ87 L5LWP7                        | 7 |
| 288 | ko00903 | Limonene and pinene degradation            | A0A0B5H3N2 M3Z4A6 A0A1S3WFI0 D2HFN2 K9IKY8 L5KTT6 M1ED65                    | 7 |
| 289 | ko00981 | Insect hormone biosynthesis                | A0A0B5H3N2 M3Z4A6 A0A1S3WFI0 D2HFN2 K9IKY8 L5KTT6 M1ED65                    | 7 |

|     |         |                                         |                                                          |   |
|-----|---------|-----------------------------------------|----------------------------------------------------------|---|
| 290 | ko04016 | MAPK signaling pathway - plant          | A0A1S2ZMZ9 W5P5I7 A0A212D6Z1 M3VXR8 C6KGS5 Q3T0E8 O97492 | 7 |
| 291 | ko00521 | Streptomycin biosynthesis               | U6DQF4 A0A287A1G6 A6QPB5 D2H7H6 F6PXA5 K9IUE2 L5KDF2     | 7 |
| 292 | ko00565 | Ether lipid metabolism                  | A0A212D3G5 L5LNE7 A0A1S2ZQN2 U6E0B4 U6DM40 M3W0M0        | 6 |
| 293 | ko05219 | Bladder cancer                          | F7DYP5 L5KWL7 F6Y0D9 U6D317 Q28194 M3WK78                | 6 |
| 294 | ko04740 | Olfactory transduction                  | A7E3V7 A0A287AGH7 D2GY27 W5P5I7 A5D9F0 Q3T0E8            | 6 |
| 295 | ko03460 | Fanconi anemia pathway                  | L7MSN1 K9K201 L5LIY6 U6DVT5 D6MZW9 B5SRK4                | 6 |
| 296 | ko03020 | RNA polymerase                          | U6D8A3 G9KHR5 F1PT38 S9WVD5 M3W7I2 S9WKD7                | 6 |
| 297 | ko00740 | Riboflavin metabolism                   | U6D1P2 W5P583 M1EKS2 F7D2D9 M3VWV0 P52556                | 6 |
| 298 | ko04940 | Type I diabetes mellitus                | W5NPE8 A0A1S3AFV5 A0A1S6Q3A1 A0A2F0BIM6 F2VYZ3 L5LQG7    | 6 |
| 299 | ko00600 | Sphingolipid metabolism                 | U6DEQ4 A0A1S3ASL0 A0A287BEZ7 M3XST3 L5LCL6 M3XG91        | 6 |
| 300 | ko05321 | Inflammatory bowel disease (IBD)        | W5NPE8 A0A287BBE2 U6DM87 A0A2F0B4X1 A0A2F0BIM6 F6ZBH0    | 6 |
| 301 | ko00362 | Benzoate degradation                    | A0A286ZXI1 U6D0R5 M3WGX6 S9XZR9 S9YMJ8                   | 5 |
| 302 | ko04080 | Neuroactive ligand-receptor interaction | P00761 F1SLN5 F1Q421 L5LNG8 M3WP64                       | 5 |
| 303 | ko00531 | Glycosaminoglycan degradation           | A0A212CYP4 A6QM01 D2HIT7 G9K475 S9XCV8                   | 5 |
| 304 | ko05332 | Graft-versus-host disease               | W5NPE8 A0A1S6Q3A1 A0A2F0BIM6 F2VYZ3 G1PPY6               | 5 |
| 305 | ko00940 | Phenylpropanoid biosynthesis            | A0A1S2ZSM7 O77834 F6ZR94 F7AXI9 S7MVX3                   | 5 |
| 306 | ko03410 | Base excision repair                    | D2H018 U6DFP5 D7PVJ0 A0A2F0B0W6 D9IWD7                   | 5 |
| 307 | ko04341 | Hedgehog signaling pathway - fly        | A0A287AGH7 K9K4J3 M3X2J2 W5QGT1 L5K1J6                   | 5 |
| 308 | ko00100 | Steroid biosynthesis                    | U6D655 D2I4G4 G9L0D3 M1EM44 W5Q5C8                       | 5 |
| 309 | ko03450 | Non-homologous end-joining              | S9X2K9 D2GXF1 D2I285 W5PI72 G1PNC7                       | 5 |
| 310 | ko04624 | Toll and Imd signaling                  | A0A212CLX0 F7DFC6 Q9N1C3 S9XDR3 L5KE51                   | 5 |

|     |         | pathway                                                |                                     |   |
|-----|---------|--------------------------------------------------------|-------------------------------------|---|
| 311 | ko01051 | Biosynthesis of ansamycins                             | A0A1S2ZXM8 A0A2F0AWA7 F7D9J2 K9IZ11 | 4 |
| 312 | ko03430 | Mismatch repair                                        | L7MSN1 K9K201 D7PVJ0 U6DVT5         | 4 |
| 313 | ko00232 | Caffeine metabolism                                    | W5PMT0 R4HZ39 F6TPL7 G1LCL2         | 4 |
| 314 | ko04122 | Sulfur relay system                                    | G1P8W4 A0A212CDD0 A0A286ZTN2 F6ULU1 | 4 |
| 315 | ko00960 | Tropane, piperidine and pyridine alkaloid biosynthesis | A0A0B4J194 A0A0B4J195 P00503 G1P0V8 | 4 |
| 316 | ko04923 | Regulation of lipolysis in adipocyte                   | A0A287AGH7 S9YL01 L8IUW5 A5GFU4     | 4 |
| 317 | ko00511 | Other glycan degradation                               | U6DEQ4 A0A212D105 G9K475 L5LCL6     | 4 |
| 318 | ko04340 | Hedgehog signaling pathway                             | A0A287AGH7 K9K4J3 W5QGT1 L5K1J6     | 4 |
| 319 | ko00400 | Phenylalanine, tyrosine and tryptophan biosynthesis    | A0A0B4J194 A0A0B4J195 P00503 G1P0V8 | 4 |
| 320 | ko04320 | Dorso-ventral axis formation                           | K9K3J6 F7DYP5 L5KWL7 M3WK78         | 4 |
| 321 | ko00730 | Thiamine metabolism                                    | A0A212D327 W5P583 U6DX68 L5JRN4     | 4 |
| 322 | ko05217 | Basal cell carcinoma                                   | Q2A135 Q9MZS6 L5LGV5 A0A2F0B0W0     | 4 |
| 323 | ko04710 | Circadian rhythm                                       | M3X2J2 K4P0T7 L5K1J6 A0A212C888     | 4 |
| 324 | ko00750 | Vitamin B6 metabolism                                  | J9P5E0 M3XFH2 O46560                | 3 |
| 325 | ko00130 | Ubiquinone and other terpenoid-quinone biosynthesis    | S7N2T9 F7AVJ5 K9J536                | 3 |
| 326 | ko04742 | Taste transduction                                     | A0A287AGH7 A0A2I2V1R9 G1Q5E2        | 3 |
| 327 | ko00261 | Monobactam biosynthesis                                | G1L1E2 F6RYZ0 G1NYN6                | 3 |
| 328 | ko04060 | Cytokine-cytokine receptor interaction                 | D2GWX2 G1PRD4 L8IMA9                | 3 |
| 329 | ko00460 | Cyanoamino acid metabolism                             | A0A1S2ZSM7 A0A212DF69 F6ZR94        | 3 |
| 330 | ko00471 | D-Glutamine and D-glutamate                            | L8HNN2 F1Q2N5 A0A1S3WP72            | 3 |

|     |         |                                                            |                          |   |
|-----|---------|------------------------------------------------------------|--------------------------|---|
|     |         | metabolism D                                               |                          |   |
| 331 | ko04913 | Ovarian Steroidogenesis                                    | A0A287AGH7 A5GFU4 I3L7D6 | 3 |
| 332 | ko00626 | Naphthalene degradation                                    | A0A0B5GZG6 L5LC88 S9WD75 | 3 |
| 333 | ko00524 | Neomycin, kanamycin and gentamicin biosynthesis            | A0A287A1G6 F6PXA5 L5KDF2 | 3 |
| 334 | ko04712 | Circadian rhythm - plant                                   | G1NSY2 D2HSA3 N0E6I4     | 3 |
| 335 | ko00512 | Mucin type O-glycan biosynthesis                           | D2HT91 M1ENC1 W5PDL7     | 3 |
| 336 | ko04744 | Phototransduction                                          | A7E3V7 W5P5I7 Q3T0E8     | 3 |
| 337 | ko02026 | Biofilm formation - Escherichia coli                       | A0A2I2UFQ4 F1RQQ7 F6ZD04 | 3 |
| 338 | ko00643 | Styrene degradation                                        | A0N0X7 N0A2M5 S9WMB0     | 3 |
| 339 | ko00591 | Linoleic acid metabolism                                   | U6DM40 X5L565            | 2 |
| 340 | ko03022 | Basal transcription factors                                | A0A2I2UQ03 D2HDN5        | 2 |
| 341 | ko04112 | Cell cycle - Caulobacter                                   | U6DSC4 U6D5X0            | 2 |
| 342 | ko00281 | Geraniol degradation                                       | A0A2C9F3C3 F6Q4C8        | 2 |
| 343 | ko04136 | Autophagy - other eukaryotes                               | G9KI77 D2HLC6            | 2 |
| 344 | ko00440 | Phosphonate and phosphinate metabolism                     | U6E0B4 A0A1S3WVY8        | 2 |
| 345 | ko04330 | Notch signaling pathway                                    | U6E0K5 J9NTH6            | 2 |
| 346 | ko01503 | Cationic antimicrobial peptide (CAMP) resistance           | A0A171R279 S9YK31        | 2 |
| 347 | ko00603 | Glycosphingolipid biosynthesis - globo and isoglobo series | M3XST3 G9K475            | 2 |
| 348 | ko04392 | Hippo signaling pathway - multiple species                 | A0A212CVT7               | 1 |

|     |         |                                                               |            |   |
|-----|---------|---------------------------------------------------------------|------------|---|
| 349 | ko00908 | Zeatin biosynthesis                                           | A0A2I2U6Z7 | 1 |
| 350 | ko00633 | Nitrotoluene degradation                                      | F6TPL7     | 1 |
| 351 | ko00601 | Glycosphingolipid biosynthesis<br>- lacto and neolacto series | K9J2F1     | 1 |
| 352 | ko00430 | Taurine and hypotaurine<br>metabolism                         | M1EJD5     | 1 |
| 353 | ko00604 | Glycosphingolipid biosynthesis<br>- ganglio series            | G9K475     | 1 |
| 354 | ko03070 | Bacterial secretion system                                    | K9J2T4     | 1 |
| 355 | ko04950 | Maturity onset diabetes of the<br>young                       | A0A212CI59 | 1 |
| 356 | ko00944 | Flavone and flavonol<br>biosynthesis                          | A0A212CYP4 | 1 |
